# Supplementary material for: An optimized CRISPR/Cas9 approach for precise genome editing in neurons
Source: eLife. 2021 Mar 10;10:e65202. doi: 10.7554/eLife.65202 (PMC7946428; doi:10.7554/eLife.65202)
Supplement: Figure 2—figure supplement 1—source data 1. [file elife-65202-fig2-figsupp1-data1.xlsx]

## Sheet: Fig2_supplement1
Panel B
	SEP-GluA2 KI	untransfectd
cell01	13.2038	14.7616
cell02	18.5213	15.3576
cell03	13.628	14.352
cell04	13.4914	12.1913
cell05	10.9116	12.2327
cell06	15.4029	10.4904
cell07	13.723	15.2865
cell08	12.4952	11.7011
cell09	9.15195	12.1413
cell10	11.9163	11.6038
cell11	12.8644	9.98275
cell12	13.4482	12.096
cell13	11.949	18.9221
cell14	13.5183	12.5865
cell15	14.7886	12.4615
cell16	10.8049	14.5596
cell17	11.9192	17.2231
cell18	19.1452	13.1279
cell19	19.6327	11.2587
cell20	13.8664	21.2058
cell21	10.6384	17.0933
cell22	11.2	21.7789
cell23	18.8779	19.7307
cell24	19.4182	19.622
cell25	14.3106	17.0981
cell26	17.2961	17.7856
cell27	17.1701
Ave.	14.1961	14.8712
