# Supplementary material for: An optimized CRISPR/Cas9 approach for precise genome editing in neurons
Source: eLife. 2021 Mar 10;10:e65202. doi: 10.7554/eLife.65202 (PMC7946428; doi:10.7554/eLife.65202)
Supplement: Figure 2—figure supplement 1—source data 2. [file elife-65202-fig2-figsupp1-data2.xlsx]

## Sheet: Fig2_supplement1
Panel C	SEP + /mCherry + cells
%	SEP-GluA2	GluA2 donor
Exp.#1	40.00 (34/85)	0 (0/62)
Exp.#2	37.35 (31/83)	0 (0/18)
Exp.#3	34.52 (29/84)
Exp.#4	43.75 (35/80)
Ave.	38.91	0
