# Supplementary material for: An optimized CRISPR/Cas9 approach for precise genome editing in neurons
Source: eLife. 2021 Mar 10;10:e65202. doi: 10.7554/eLife.65202 (PMC7946428; doi:10.7554/eLife.65202)
Supplement: Figure 2—figure supplement 3—source data 1. [file elife-65202-fig2-figsupp3-data1.xlsx]

## Sheet: Fig2_supplement3
SEP + /mCherry + cells
%	SEP-beta2
Exp.#1	28.57 (24/84)
Exp.#2	21.05 (20/95)
Exp.#3	32.05 (25/78)
Ave.	27.23
