# Supplementary material for: An optimized CRISPR/Cas9 approach for precise genome editing in neurons
Source: eLife. 2021 Mar 10;10:e65202. doi: 10.7554/eLife.65202 (PMC7946428; doi:10.7554/eLife.65202)
Supplement: Figure 2—figure supplement 4—source data 1. [file elife-65202-fig2-figsupp4-data1.xlsx]

## Sheet: Fig2_supplement4
immunofluorescence signal
GFP-Gephyrin	anti-Gephyrin
0.393534	0.406194
0.977013	1.27254
0.466065	0.565261
0.645597	2.39084
1.0289	1.03266
1.01507	1.27254
0.890837	0.631433
0.697481	0.927425
0.393534	0.680298
0.559242	0.57506
0.393534	1.08649
0.997838	1.43402
0.673245	1.62248
0.807894	1.31657
1.75726	2.29298
1.25672	1.59309
0.890837	1.47563
0.780246	0.927425
0.44883	1.23334
0.65601	1.08407
0.580068	0.619089
0.466065	1.01065
0.607715	0.812515
0.697481	0.898157
0.635184	1.00823
0.766422	0.87856
0.662832	1.31657
0.497124	0.230075
0.673245	0.293702
1.29119	1.22851
0.811305	0.57506
0.562832	0.455187
0.417771	0.384179
0.514359	0.25209
1.5192	1.2579
0.576657	0.690097
0.873423	1.59805
0.597303	0.917754
0.918306	1.97981
0.611127	1.15266
0.538596	0.988634
0.517949	0.7905
0.545418	0.783119
0.787247	0.998433
0.580068	1.26274
1.03913	1.23334
0.669833	1.77417
0.801071	2.53769
0.704304	1.24556
1.00807	2.17311
0.918306	1.38516
1.0806	1.89417
0.93572	1.12327
0.559242	0.604455
0.707715	0.641104
0.82854	2.1609
0.911484	1.90881
0.545418	1.25294
1.07378	2.48145
0.966779	3.0149
1.03572	1.9186
1.52261	3.11034
0.838953	1.10367
0.69048	1.32637
0.89766	1.65672
1.17737	3.67572
1.74361	2.35903
1.26714	3.98648
0.776834	1.41201
0.918306	2.10452
0.769833	1.54664
0.490302	1.39979
0.514359	2.95381
0.82854	2.29057
0.535185	0.724328
0.807894	1.97243
1.15313	2.39822
0.804482	1.66893
1.32584	1.9676
1.1289	2.02384
1.83338	2.64535
1.27396	2.04344
0.538596	0.633851
0.649008	1.02541
0.687069	1.84276
0.583479	1.09884
0.728541	1.98961
0.631773	2.74575
0.597303	3.70257
0.69048	0.934806
0.842364	1.95284
0.680067	2.28573
0.617949	1.16488
0.538596	1.35576
0.549009	1.53188
0.766422	4.28743
0.666422	1.22609
0.704304	2.39084
0.880425	1.30193
1.0289	1.84276
0.776834	2.06787
1.13931	1.50261
0.607715	0.86138
1.30502	1.87699
0.714716	2.67233
0.742364	2.70414
0.787247	2.16815
1.36372	2.46923
1.21866	2.315
1.0289	1.6641
1.14631	2.1511
1.25331	1.95284
0.769833	1.01319
0.911484	1.51966
0.818306	1.07682
1.06678	1.79619
0.69048	2.80442
0.945954	1.95042
1.04272	1.57604
1.14972	1.97243
0.773423	1.28475
0.756188	2.76293
0.870012	1.29951
0.911484	1.6347
0.559242	1.12085
0.790659	1.23093
0.617949	1.17951
0.583479	0.829567
0.687069	1.42677
0.945954	1.41697
0.883836	2.26613
0.801071	1.65188
0.859599	2.76293
0.838953	2.01888
1.05996	1.98961
1.04272	2.76777
2.13715	2.3346
3.27305	3.9791
1.25331	2.69676
1.33608	1.18931
1.85403	1.9284
1.87126	0.805134
0.890837	1.02045
0.44883	0.687679
0.790659	0.917754
0.93572	1.02783
0.859599	0.477201
0.987425	1.09387
1.11525	2.14372
1.2499	0.371963
0.870012	0.367127
0.617949	1.11347
0.735363	0.558008
0.804482	0.457604
0.835542	0.80997
2.41686	1.01803
0.842364	2.65515
1.95061	2.3444
1.04954	1.38261
0.617949	0.961784
1.06337	1.08407
0.8666	2.42762
0.838953	0.778157
1.01848	1.02045
1.4639	1.1869
1.11166	1.00581
0.801071	1.47322
1.36714	2.28319
0.966779	2.2954
1.06678	0.76594
1.29119	1.47322
0.614538	1.92599
0.704304	1.13548
0.780246	1.39496
0.773423	1.27012
0.921896	1.68128
1.21525	2.13392
0.852777	1.45362
0.662832	0.188463
0.742364	1.4316
0.742364	0.288739
0.535185	1.57846
1.01848	0.521231
0.752598	0.313299
1.04613	0.484582
0.714716	1.13548
0.604125	1.29213
0.442007	1.63966
0.600714	1.36556
0.58689	0.824731
0.604125	1.45858
0.521361	0.430754
0.593892	1.08166
0.752598	0.425791
0.880425	3.07127
1.13931	0.824731
1.48796	1.36556
0.849365	1.16246
1.03913	1.49281
1.00466	1.54664
1.6192	1.21133
0.55242	0.276522
0.638775	0.300955
1.00466	0.780702
2.03015	1.07924
1.33267	0.927425
1.42943	0.876142
1.38455	0.802717
0.939131	0.494381
1.31543	1.3508
1.37073	0.922589
0.738774	0.71453
1.22566	0.849164
1.02549	0.413575
1.56408	0.836948
1.70896	0.775739
1.01166	0.39156
1.8955	0.447806
1.90232	0.342567
1.52602	0.22753
1.20843	1.6641
1.60896	1.15266
1.47773	0.332769
2.07844	1.23334
1.82638	0.506597
2.14756	0.53103
1.38796	0.296119
3.58723	1.71309
2.1612	1.06944
2.33391	1.43402
1.3499	0.7905
1.98526	1.25052
0.645597	0.315717
1.0289	1.05964
2.23374	1.46584
1.30161	1.3606
1.31884	1.16246
1.61579	1.54906
1.0219	0.839365
0.959778	0.6705
0.911484	0.611836
0.631773	0.430754
2.26839	1.70075
2.23374	1.37281
1.41202	0.707276
1.21525	0.895612
1.10825	1.03763
0.966779	1.10609
1.47432	1.19669
1.86444	0.925007
1.92656	1.15266
1.39478	0.785537
0.814716	0.6705
0.8666	0.873597
2.68957	1.948
1.06678	3.63653
3.71487	1.83538
1.07719	1.41201
2.2718	1.52704
2.72063	1.58825
1.52943	0.702313
2.30286	1.09629
1.43626	0.428209
0.814716	0.259343
1.50879	0.836948
1.25672	0.73909
0.790659	0.367127
0.83213	0.787955
1.7262	0.858963
1.0806	0.641104
0.980603	0.717075
0.990837	0.376926
0.580068	0.369545
1.50537	0.910373
1.82297	0.685261
1.71938	0.893194
0.745776	0.381761
1.47073	0.658284
1.23949	0.433172
1.14272	0.384179
1.28437	0.655866
0.624951	0.389142
0.835542	0.609291
1.16355	0.846746
0.825129	0.553045
1.01166	0.697478
0.963189	1.4316
0.41436	0.393977
0.604125	0.23491
1.82979	1.14045
0.804482	1.23831
2.01632	3.03207
1.01507	0.692515
0.576657	0.72191
1.17037	1.29213
1.47773	0.895612
1.36372	0.871179
1.17737	1.22113
0.821717	0.401358
1.74702	0.768358
0.914895	0.308336
1.22225	0.555462
0.863189	0.69506
2.29944	1.18193
0.673245	0.330351
0.8666	0.286321
1.01507	0.359746
1.36031	0.873597
0.883836	0.384179
0.863189	0.352365
1.50879	1.10609
1.04954	1.26032
0.904482	2.02626
0.928719	1.06206
0.952955	0.660701
2.13715	1.70075
1.1876	1.4316
0.818306	0.883395
1.65726	1.1673
0.631773	0.658284
2.12332	1.32395
0.921896	0.479619
0.597303	0.37438
2.00932	1.28972
0.549009	0.460022
0.756188	0.915209
1.28096	0.72191
0.766422	0.925007
1.18419	1.57349
0.687069	0.342567
1.17037	1.2579
1.32225	0.72191
1.19802	1.19428
1.48455	0.839365
1.71938	1.70571
1.17037	1.0034
0.797481	0.43559
0.58689	0.276522
1.2429	1.36556
1.71238	2.3444
0.921896	0.917754
1.09784	0.939769
0.673245	1.00085
0.624951	0.330351
1.59155	1.26274
1.19119	0.712112
1.09784	1.14528
1.74002	1.63712
0.756188	0.951985
0.752598	1.09629
0.659421	0.584858
3.04863	2.54507
3.36622	2.47661
0.980603	1.47805
1.25331	0.680298
1.88508	1.72772
1.75726	1.73014
1.4569	1.60047
2.28562	1.88437
1.52602	1.98223
0.769833	0.560425
1.51561	1.58087
0.928719	1.25536
0.79407	2.73596
0.963189	0.748888
0.818306	1.21375
1.47073	1.63228
0.952955	1.32878
0.997838	0.702313
0.700893	0.751306
0.966779	0.844328
0.528183	1.20649
0.780246	0.802717
0.763011	0.858963
0.611127	1.97485
1.39137	1.93578
1.0876	0.611836
0.645597	0.357328
0.707715	0.768358
0.573066	1.15508
0.600714	0.472366
0.728541	0.812515
1.67449	2.04586
0.714716	1.06448
2.22691	1.67631
1.63643	2.58172
0.873423	1.15012
1.10484	1.00823
1.30161	0.778157
0.517949	0.332769
1.1876	0.677881
0.752598	0.313299
2.30968	1.36556
0.666422	0.39156
0.517949	0.337731
0.752598	0.425791
0.535185	0.440552
1.0806	0.636269
0.731952	0.342567
0.583479	0.379343
0.783657	0.62647
0.669833	1.39979
1.06337	0.697478
0.504126	0.775739
0.693891	0.584858
0.697481	0.43559
0.649008	0.741507
0.535185	0.927425
0.673245	0.215313
0.773423	0.565261
0.766422	0.445388
0.542007	0.41841
0.659421	0.888358
1.59855	0.763522
0.997838	0.839365
0.83213	0.680298
0.531774	0.27894
0.704304	0.491836
0.918306	0.43559
1.31202	0.51385
4.57465	3.67572
0.521361	0.283903
0.707715	0.863798
0.911484	0.379343
0.645597	1.04501
0.925307	2.12666
1.0876	1.00581
1.67108	0.998433
0.894248	1.03763
1.81255	0.998433
1.75726	1.32637
1.17037	0.778157
0.763011	0.305918
1.34308	0.812515
0.711305	2.06304
0.55242	0.318134
0.673245	0.408739
0.711305	0.876142
1.0876	1.17226
0.397125	0.276522
1.47773	1.2481
1.22225	2.5279
0.617949	0.920172
1.5122	2.00908
0.669833	1.49281
0.956366	0.665664
0.687069	0.433172
0.607715	2.28077
0.611127	0.34753
0.669833	0.707276
0.687069	0.92997
1.32925	0.849164
1.0219	1.32878
0.718128	0.675463
0.814716	1.37536
0.673245	0.457604
0.683658	0.751306
1.21866	1.33858
0.669833	0.39894
0.852777	0.447806
0.442007	0.320552
0.638775	0.408739
1.01166	0.756142
0.984014	1.57604
3.10734	2.09485
1.04954	0.976418
0.977013	0.39156
1.23608	0.856545
1.29119	0.668082
0.410769	0.232492
0.763011	0.761104
1.26714	0.550627
1.1289	1.27254
1.00125	1.26516
2.67574	2.27097
2.24074	1.24314
1.56408	1.09146
1.14631	0.898157
1.93338	1.19173
0.642186	0.335314
0.555831	0.237328
1.71597	2.62588
0.593892	0.731709
1.39819	0.668082
3.12457	2.09231
3.58023	4.04272
0.807894	0.247127
1.16696	0.53103
3.54917	2.35903
0.894248	0.584858
1.20843	1.13307
0.939131	0.658284
0.918306	0.736545
0.752598	0.337731
1.94038	1.10609
3.18328	2.33956
0.745776	0.87856
1.41202	1.58087
0.687069	0.663246
0.845954	0.51385
0.973602	0.922589
1.67108	1.00581
0.838953	1.14528
1.09784	1.87216
0.763011	0.318134
0.431595	0.20806
0.597303	1.04984
0.600714	0.621634
0.745776	0.562843
0.877013	0.572642
0.863189	0.856545
0.55242	0.6705
1.54667	1.80115
0.925307	1.38261
0.883836	1.51966
0.804482	1.20649
1.02549	0.484582
0.856188	1.2481
0.908072	0.658284
0.901071	0.942187
0.956366	0.469821
0.766422	1.07428
0.714716	0.41841
0.766422	0.761104
1.16696	1.10863
0.645597	0.438007
0.497124	0.494381
0.642186	0.567806
0.479889	0.386597
0.825129	0.501634
1.17378	0.584858
0.669833	0.643649
0.428184	0.173701
0.576657	0.296119
0.821717	0.440552
0.583479	1.15508
0.714716	0.411157
0.421182	0.281485
0.562832	0.487
0.569655	1.60047
1.0219	0.34753
1.18078	0.6705
0.863189	1.35818
1.25331	0.499216
0.759599	0.313299
0.700893	0.254507
1.04613	0.313299
0.635184	0.587276
1.12549	0.687679
0.749187	0.39894
0.939131	0.222694
0.666422	0.797754
0.697481	0.538411
0.928719	0.604455
0.783657	0.354783
1.05295	1.03521
0.825129	0.753724
0.507537	1.06206
0.662832	0.362164
0.749187	0.389142
0.597303	0.452769
0.69048	0.415992
0.452241	0.403776
0.621539	0.805134
0.669833	0.430754
0.728541	0.447806
0.531774	0.719492
0.462654	0.430754
0.97019	0.792918
1.01848	0.959238
0.939131	0.619089
0.476478	0.34753
0.597303	0.570224
0.493713	0.217858
0.804482	0.787955
1.2982	0.841783
0.852777	1.42919
0.856188	1.21629
0.873423	1.99941
0.718128	0.23491
0.645597	0.944604
0.735363	0.628888
0.604125	0.386597
0.631773	0.636269
0.721539	0.359746
0.849365	0.638686
0.593892	0.396395
0.821717	1.90143
0.583479	0.462567
0.977013	0.467403
1.03913	0.937224
0.559242	0.166448
0.611127	0.291156
0.576657	0.406194
0.624951	0.533448
0.821717	0.951985
0.959778	0.474784
0.676656	0.325515
1.0806	0.516396
0.545418	0.521231
0.500535	0.249672
0.566244	0.925007
0.773423	0.425791
0.845954	0.423373
0.728541	0.428209
0.65601	0.264306
1.83679	1.78639
0.583479	0.675463
0.673245	0.310754
1.01848	0.499216
0.673245	1.34354
1.03231	0.812515
1.0876	0.898157
0.859599	0.993597
0.576657	0.256925
0.666422	0.685261
1.04272	0.787955
1.17037	1.09146
0.825129	2.5279
1.11866	0.849164
1.38455	1.77417
1.59155	1.10367
1.19802	0.920172
1.37414	1.38999
0.928719	0.489418
0.659421	0.501634
1.39137	0.428209
1.86085	1.16972
1.53985	1.57107
0.714716	0.675463
2.35115	1.26516
3.15222	1.81095
1.76426	1.80115
0.493713	0.300955
1.29478	0.756142
1.00807	0.846746
0.956366	0.907955
1.40861	0.951985
0.904482	0.88594
0.718128	0.734127
0.942542	0.614254
0.97019	0.462567
1.26355	0.543246
1.32925	0.71453
1.50537	0.44297
1.48455	0.961784
3.2454	1.81095
0.65601	1.11589
0.82854	0.780702
0.676656	0.983799
0.593892	1.24072
0.966779	0.482037
0.738774	0.479619
1.04954	0.604455
0.593892	0.535993
0.542007	0.707276
0.769833	0.352365
1.25331	0.628888
0.804482	0.171284
0.493713	0.127254
0.545418	0.249672
0.8666	0.572642
0.973602	0.668082
0.818306	0.178664
0.607715	0.491836
0.769833	0.83453
0.894248	0.401358
0.980603	0.638686
1.76085	0.511433
0.590301	0.521231
2.11291	0.193298
0.645597	0.628888
0.984014	0.741507
1.37414	0.283903
3.36281	0.785537
0.838953	1.13307
2.23733	1.28972
0.966779	0.269142
0.807894	1.07186
2.14756	1.4904
1.46049	0.58244
1.6262	0.956821
2.07503	1.31415
2.50662	1.40463
3.82888	2.04828
2.17503	1.40221
2.06462	1.13307
2.21309	1.828
2.64127	1.34838
2.4305	2.01888
1.10825	0.611836
1.92997	1.30435
0.990837	0.550627
1.47073	0.743925
2.44092	1.17226
0.700893	0.340149
1.2982	0.954403
0.804482	0.836948
0.763011	0.736545
0.759599	0.988634
0.93572	0.851582
2.57556	1.05964
1.28096	0.724328
0.787247	0.846746
0.742364	0.298537
0.731952	0.499216
0.624951	0.396395
0.745776	0.381761
1.46731	0.939769
1.28778	0.800171
1.21866	0.729291
0.870012	0.457604
1.33608	0.663246
0.825129	0.606873
1.05996	0.62647
1.07378	0.57506
1.95762	1.03025
1.84361	1.16488
1.07037	0.624052
0.752598	0.53103
3.73211	2.03848
1.98867	1.40463
2.03356	1.08166
0.752598	0.709694
1.29478	2.01646
1.20502	0.805134
0.918306	0.69506
0.752598	0.787955
0.801071	1.01803
0.621539	0.269142
1.26714	1.03763
0.569655	0.340149
1.95061	1.11105
1.65385	0.959238
0.894248	0.971582
1.06678	0.450224
0.838953	0.489418
1.1359	0.802717
0.963189	0.428209
0.700893	0.641104
1.68832	0.680298
0.821717	0.457604
1.20143	0.352365
1.47432	0.768358
0.535185	0.266724
3.12116	1.8574
2.43409	1.10609
1.37073	0.73909
0.811305	0.396395
1.11866	1.59309
0.908072	0.467403
0.82854	0.308336
1.59514	0.802717
0.801071	0.501634
0.735363	0.487
0.642186	0.247127
0.93213	0.533448
1.52261	1.77417
1.00125	0.726873
0.69048	0.386597
1.19119	0.690097
0.55242	0.225112
0.745776	1.72276
0.842364	0.934806
1.09443	0.41841
1.67791	1.11589
1.32584	0.650903
0.535185	0.668082
0.987425	0.6705
0.497124	0.472366
0.455652	0.25209
0.604125	0.371963
0.569655	0.464985
0.435006	0.0856418
0.645597	0.408739
0.473067	0.215313
0.604125	0.222694
0.383301	0.188463
0.517949	0.283903
0.324594	0.102821
0.959778	0.472366
0.649008	0.281485
0.69048	0.41841
1.13931	0.780702
1.17037	0.602037
1.18419	0.672918
1.13249	1.21375
0.911484	1.24556
0.997838	0.844328
1.24631	1.05964
0.790659	0.690097
0.901071	0.753724
0.811305	0.548209
0.894248	0.619089
0.549009	0.484582
1.09784	0.969037
1.38455	1.23334
0.497124	1.38999
1.16014	0.787955
0.790659	0.51385
1.51561	1.19669
1.11866	0.616672
0.676656	0.937224
0.718128	1.14045
0.721539	1.91619
0.8666	1.38999
0.711305	0.797754
1.26013	1.64208
1.38796	0.966619
0.735363	0.912791
1.0876	0.751306
0.759599	0.743925
0.69048	0.44297
0.742364	0.856545
1.42243	1.28972
0.835542	0.704731
0.576657	0.812515
0.914895	1.20407
1.1359	0.883395
0.742364	0.555462
0.93213	0.602037
1.64343	1.82316
0.459243	0.692515
0.524772	0.643649
1.53284	1.77175
1.50879	1.41201
0.769833	0.812515
0.845954	1.20153
0.863189	1.38019
0.542007	0.751306
0.756188	2.14868
0.856188	1.4904
0.355653	0.528612
0.559242	0.719492
0.804482	0.895612
0.966779	0.614254
0.580068	0.34753
1.0876	0.856545
0.517949	0.376926
0.428184	0.631433
0.69048	0.469821
0.338418	0.452769
0.514359	0.560425
0.538596	0.991052
0.638775	0.41841
0.576657	1.1771
0.569655	0.406194
0.642186	0.753724
0.307359	0.141888
0.58689	0.342567
0.386712	0.345112
0.390123	0.237328
0.397125	0.0856418
0.521361	0.325515
0.372888	0.589821
0.466065	0.831985
0.562832	0.310754
0.435006	0.621634
0.445419	0.425791
0.783657	0.516396
1.55708	1.1379
0.807894	0.22753
0.756188	0.369545
0.680067	0.320552
0.459243	0.428209
0.666422	0.342567
0.421182	0.690097
0.652598	0.34753
0.952955	0.702313
0.576657	1.22851
1.13931	1.00085
0.904482	0.785537
1.03572	1.48301
0.728541	0.401358
0.593892	0.425791
0.452241	0.807552
1.01507	0.836948
0.549009	0.181082
0.652598	0.7905
0.638775	0.469821
0.759599	0.854127
0.559242	1.6445
0.759599	1.01065
0.490302	0.479619
1.04954	1.19173
0.776834	1.72772
1.03572	1.19173
0.911484	0.712112
1.00466	1.30435
0.949365	0.655866
0.863189	0.736545
0.507537	1.96022
0.756188	0.954403
0.79407	0.215313
0.714716	0.675463
0.769833	0.511433
0.994248	2.00425
0.842364	1.01561
0.918306	0.658284
0.83213	0.846746
1.31543	1.22609
0.669833	0.829567
0.607715	0.511433
0.549009	0.558008
0.348651	0.558008
0.756188	0.665664
0.69048	1.03266
0.500535	0.325515
0.652598	0.978836
0.4833	1.97485
0.289944	0.141888
0.542007	0.516396
1.02549	0.856545
0.704304	1.05964
0.945954	0.920172
0.517949	1.15012
0.462654	0.3035
0.569655	0.981381
0.569655	0.580022
0.490302	0.920172
0.417771	0.880977
0.442007	0.69506
0.514359	0.690097
0.559242	0.447806
0.362475	0.550627
0.531774	0.151686
0.555831	0.927425
1.23608	0.986216
0.645597	0.254507
0.645597	1.46825
0.738774	0.44297
0.79407	0.868761
0.614538	0.560425
0.984014	0.858963
1.28437	1.15992
1.34649	1.67631
0.383301	0.655866
0.583479	0.558008
1.04272	0.792918
0.801071	1.341
0.883836	0.831985
1.16014	1.75216
1.62961	1.49281
0.72495	0.580022
1.12549	0.925007
0.783657	0.521231
0.718128	0.758687
0.662832	1.20649
0.714716	1.30193
0.918306	0.846746
1.1289	0.619089
1.33608	0.846746
0.787247	0.58244
0.597303	0.7905
0.576657	0.555462
1.17037	0.87856
0.631773	1.39241
0.44883	0.680298
0.590301	0.474784
0.890837	0.704731
1.37755	2.42266
0.659421	0.518813
1.37755	2.56709
1.60537	1.50007
0.614538	0.567806
0.838953	2.32238
1.09102	0.73909
0.607715	1.90397
0.977013	0.927425
0.845954	1.02783
0.749187	0.883395
0.72495	1.71793
1.05996	2.16815
1.1359	2.46185
0.742364	1.52221
0.528183	0.87856
0.528183	0.535993
0.797481	0.893194
1.84702	2.08009
0.728541	1.37536
0.459243	0.27894
1.53985	1.27992
0.600714	0.22753
0.469476	0.389142
0.731952	0.768358
0.887247	1.50261
0.497124	0.893194
0.442007	1.02045
0.680067	2.00666
0.590301	0.535993
0.593892	0.445388
0.559242	1.10609
0.479889	0.770903
0.607715	1.4904
0.338418	0.186045
0.497124	0.371963
0.355653	0.758687
0.583479	0.668082
0.649008	0.469821
0.580068	0.494381
0.421182	0.53103
0.79407	1.12569
0.386712	1.58329
0.321003	0.702313
0.265887	0.274104
0.555831	1.11347
0.607715	0.949567
