# Supplementary material for: An optimized CRISPR/Cas9 approach for precise genome editing in neurons
Source: eLife. 2021 Mar 10;10:e65202. doi: 10.7554/eLife.65202 (PMC7946428; doi:10.7554/eLife.65202)
Supplement: Figure 2—figure supplement 6—source data 1. [file elife-65202-fig2-figsupp6-data1.xlsx]

## Sheet: Fig2_supplement6
immunofluorescence signal
SEP-GluA1	Anti-GluA1		SEP-GluA2	Anti-GluA2		SEP-GluA3	Anti-GluA3
1.98889	1.16758		0.448409	0.349741		2.56077	0.961001
2.09103	1.06584		1.83223	1.45373		2.09844	1.71342
1.96301	1.387		2.35995	1.55945		0.722855	1.30577
1.24986	1.13697		0.470774	0.401924		1.15676	1.16026
1.05085	3.0098		0.451423	0.322327		1.63749	1.84782
1.0495	0.543846		1.12961	1.16662		2.55457	1.85015
1.11187	1.23325		0.564305	0.514162		1.30684	0.645087
1.95239	0.992523		0.768656	0.441079		0.89988	0.781811
1.79715	0.991953		0.5633	0.678582		0.827397	0.739163
2.10697	1.09045		0.372115	0.60421		1.10031	0.909395
1.13043	1.67863		0.40775	0.491972		1.58458	1.08858
1.49665	1.32298		1.69191	1.59596		0.645356	0.927314
1.71753	1.06966		1.5353	1.34936		1.06097	1.47832
1.79184	1.37443		0.69141	0.626399		1.23672	2.59146
1.25051	0.600209		0.701561	0.578084		3.34017	2.94321
0.972537	0.859569		0.984216	0.908283		1.21459	1.23642
1.03094	2.79261		0.748353	0.896543		1.58212	2.55132
1.10259	1.63376		2.24099	1.85043		1.51701	2.84466
1.55436	1.58724		0.886614	0.957819		0.928203	1.15363
0.827271	1.88106		1.22521	1.17313		1.33261	1.37977
1.20939	0.716745		0.607026	0.72554		1.35601	1.22746
1.42034	0.953658		1.04222	0.863903		2.12922	0.752603
0.688628	0.672446		2.49314	1.61686		1.60552	1.10417
0.920792	0.366594		2.4189	1.35323		1.85385	0.737013
2.03998	1.96041		2.03759	1.21229		1.43587	0.642938
1.1948	1.2524		2.85917	1.87655		0.849428	0.512844
1.41969	2.26407		1.43976	1.00484		1.64122	0.929643
1.24389	1.41545		1.24858	0.786884		1.14821	0.981071
0.971226	1.47289		2.26029	1.61557		1.37441	0.636128
0.984473	1.10576		2.26129	1.69123		1.37077	1.11331
1.21733	1.22013		0.999496	0.869128		1.25885	1.74263
1.89336	2.01128		0.471779	0.473718		1.49124	1.98454
1.71688	1.80666		1.8353	1.23583		1.04612	2.59612
1.32813	1.44883		0.97306	0.575506		1.1605	0.895955
1.33344	1.19823		0.850026	0.829974		0.642897	0.860117
2.05522	1.32517		2.57244	1.7787		1.12726	1.56577
1.6021	1.06911		3.28009	2.34504		0.910895	1.53208
1.42431	1.4521		2.52465	1.91442		1.1544	1.37762
0.985163	0.837662		1.17641	1.17578		1.62647	1.73152
0.888296	0.802098		0.844951	1.19145		0.982295	1.46937
1.12846	0.701978		1.54144	1.03613		1.71616	1.10417
1.92917	0.817974		1.33909	1.08444		1.53914	1.15363
1.28832	1.02809		1.13268	1.22145		2.13414	2.2019
2.03663	1.39795		0.777856	0.524612		1.86732	1.86807
1.23989	1.0702		0.755438	0.771209		1.05478	2.67442
1.41703	1.05378		1.12153	1.22538		1.97187	1.05938
3.21815	1.66713		3.00764	2.55642		1.85631	1.37081
1.51521	1.58835		1.0778	0.886093		1.26504	1.16922
1.05015	0.867764		0.500277	0.518098		1.6904	1.71342
1.43759	2.20935		0.852035	0.552027		1.80586	2.03149
1.66382	1.35198		0.639542	0.441079		2.35296	1.78743
1.68304	1.62992		0.989345	0.983945		2.05428	1.25649
1.78125	1.85972		0.627329	0.732055		0.856803	1.32601
2.56671	2.08297		0.708699	0.656393		1.38542	0.804209
2.4924	2.02004		0.616173	0.639428		1.57238	1.06619
1.11849	1.55936		0.419911	0.655104		1.01298	0.338313
1.15033	1.70981		0.835804	0.897832		1.24783	0.981071
2.0466	2.34504		1.22521	0.925247		2.53491	2.45492
1.53446	1.66986		0.660902	0.976141		1.2736	1.96895
2.1189	1.60804		0.795092	1.21229		1.0892	1.44464
1.06544	1.66659		4.08337	3.37201		1.22816	1.90606
1.69366	2.1891		2.52872	2.47811		0.872834	0.987701
1.24655	0.650538		0.531789	0.651168		0.95397	1.85911
1.05416	0.640694		0.569381	1.57248		2.97629	1.11779
1.69897	0.915903		1.57295	1.05309		1.19246	0.737013
1.43228	1.10303		0.58059	0.495908		2.54848	1.53208
1.52914	1.38754		0.519575	0.908283		1.93499	1.43801
1.37922	1.32956		0.839875	0.400635		1.35838	1.736
1.41703	1.02917		0.616173	0.598985		1.09166	0.844527
1.05547	0.826737		0.297935	0.182674		1.93381	0.537573
1.7985	1.54951		0.461627	0.525901		1.58713	1.28802
1.16162	1.68301		0.438205	0.481522		1.9522	2.0159
1.34007	1.60804		0.640547	0.461979		1.46911	1.662
1.46546	1.33556		0.911041	0.865193		1.28707	1.18266
1.11984	1.15501		0.888676	0.963044		1.0118	1.07515
1.70629	1.7864		1.34417	1.04787		1.2736	1.25434
1.28632	1.41272		0.91305	0.515451		0.947775	0.958671
0.879017	0.848616		1.46213	1.04922		2.24596	1.42905
1.58289	2.30128		0.518571	0.297558		1.73465	1.08858
1.08731	1.8734		0.403679	0.388896		0.812547	0.768192
1.18352	0.584333		0.80831	0.760827		1.20358	0.837719
1.23392	1.00729		0.686334	0.615949		2.35788	0.987701
1.41903	2.18036		0.468712	0.514162		0.983475	0.434538
1.06809	1.12491		1.01372	0.947437		0.741245	1.06619
1.03491	1.40342		3.53837	2.34504		1.34618	1.14234
1.38053	1.79024		0.739206	0.527191		0.576611	0.580041
1.38188	1.4822		0.566367	0.931762		1.72236	1.32601
1.67907	1.48823		0.655827	0.56112		0.97364	0.875706
1.71557	1.53253		0.879529	0.608146		0.609755	0.439019
1.47209	2.79096		0.67613	0.408439		0.736427	0.526463
1.1749	0.630309		0.886614	1.04922		1.15067	0.754932
1.33741	1.22779		0.435191	0.357545		1.5232	2.74162
3.02645	3.17286		1.53937	1.45115		1.61536	2.85362
2.57202	2.16395		0.454489	0.4176		1.00069	1.3081
1.37591	3.10284		0.405688	0.334066		1.18135	1.69551
1.85355	1.06527		1.52208	1.2906		2.1071	1.1289
1.89533	0.935051		0.299944	0.246665		2.2435	1.69335
1.45549	1.59765		0.653765	0.773855		2.04563	0.828758
1.31023	0.9099		0.376186	0.358834		2.85208	1.66863
1.09131	1.48766		0.526713	0.309298		2.27428	1.67776
1.40309	2.36749		0.752424	1.05309		1.58094	1.49624
0.89892	0.573407		1.96341	1.42109		1.81943	1.34178
1.60079	1.73937		0.600893	0.317102		1.43833	1.3373
1.10787	2.04849		0.607026	0.39541		1.79238	1.70016
1.69166	1.71254		0.80831	1.32195		2.13414	1.39984
2.04525	1.53253		0.752424	0.465847		1.23308	1.69551
2.07181	1.3777		0.38639	0.598985		2.23003	1.78976
1.32682	1.50573		1.64411	1.46289		1.56618	2.13918
1.06544	1.19003		0.52058	0.348452		1.18509	1.23409
1.77062	1.37112		0.618182	0.598985		1.92023	1.23194
1.81506	1.94726		1.0483	0.897832		1.66817	2.64988
1.47474	1.75687		0.373172	0.567634		3.27871	1.83886
1.16096	1.85206		0.762576	1.10399		1.40755	1.24538
1.39381	2.08514		1.92883	3.64867		1.29573	2.03615
2.28342	1.78039		0.835804	1.20055		2.63207	2.07181
1.27042	1.02644		1.20998	1.0727		2.29887	1.25219
1.49134	1.78859		1.16419	1.14185		1.00196	1.34178
1.29495	1.04723		0.771723	0.973494		1.78992	2.52659
1.12115	0.667524		1.06352	1.06483		2.41689	1.40665
1.18217	0.967884		1.25878	1.24886		2.04317	2.60042
1.1039	0.95915		1.28316	1.36497		2.1071	1.7808
1.48868	1.11779		0.769713	0.668132		2.27301	2.60042
1.37922	1.40342		0.990349	0.822103		1.40027	1.18051
1.44687	1.34979		1.22214	1.13011		1.5232	2.36532
1.67044	1.41053		1.22928	1.32324		1.84529	1.75607
1.12115	1.41599		1.81695	1.74606		3.13109	2.4594
2.39488	2.82379		0.543949	0.700772		2.41197	1.62383
1.63264	1.42364		1.62989	1.29582		1.1187	1.11779
1.4595	0.995253		1.25772	1.39632		0.665025	1.2185
0.830582	0.822896		0.486001	0.296201		1.0474	1.36185
2.06516	2.04684		0.921192	0.970916		1.23426	0.907065
2.03066	1.52323		0.385333	0.861257		2.1661	1.02372
1.11052	1.6644		1.29436	2.0671		1.06707	1.61272
0.950666	1.97736		0.950695	0.786884		1.23918	1.35737
1.35532	2.66512		0.270441	0.437143		1.63011	1.71575
0.815334	1.00291		0.343669	0.267497		1.13955	1.74926
2.14212	4.25073		0.552091	0.57157		1.29081	0.676446
1.40444	3.39993		0.419911	0.618528		1.15185	1.55233
1.83099	1.46797		0.575514	0.609435		1.56864	1.2409
1.67576	2.89546		0.476854	0.690322		2.1661	1.43568
1.39912	1.54732		0.427049	0.296201		1.50098	1.59032
1.12977	0.651648		0.619239	0.537641		1.94364	2.69467
2.28808	1.72787		0.653765	0.391474		1.70141	1.65967
1.50327	1.17689		0.412826	0.2297		2.30625	2.00909
1.81309	1.03409		0.395537	0.651168		1.71125	2.33629
2.70139	1.6945		1.0483	1.13792		2.82621	2.79986
1.99285	1.78424		0.724984	0.899122		2.48327	1.86359
1.73678	1.11125		1.10424	1.17449		1.2441	1.89047
1.34072	1.20918		0.598883	0.626399		1.15312	1.0282
1.56364	1.60204		0.768656	0.973494		1.93253	1.63727
1.74409	2.72256		0.538873	0.991748		1.23672	0.965301
2.04525	4.50625		0.884605	1.21229		1.06461	1.77399
1.28898	1.20372		0.396541	1.38458		2.79553	2.29149
1.48206	0.901137		0.645675	0.73728		0.741245	2.09206
1.23658	0.828359		0.633462	1.19668		1.06707	1.28337
1.50458	1.36458		0.80831	0.602921		2.02104	2.29149
0.582266	0.872615		0.292806	0.331488		2.08615	2.38772
0.419472	0.880622		0.662912	0.822103		1.04248	2.28917
0.668505	0.883791		1.62989	1.72516		1.41492	1.94655
0.948833	1.20299		1.2923	1.03613		1.18755	1.35504
0.495926	0.659256		0.373172	0.335355		1.34618	1.09754
0.766467	0.375336		0.673116	0.681161		0.904797	0.631649
0.731196	0.461913		0.488063	0.257047		1.3511	0.851157
0.723348	1.31684		0.506357	0.310587		1.27242	0.849008
0.546894	0.516462		0.625319	0.642075		2.25826	1.60376
0.576354	0.333632		0.812381	0.685097		0.957708	0.893805
0.419472	0.389766		0.756495	0.407149		1.78383	0.828758
0.607751	0.660842		0.984216	0.882157		1.65715	2.92296
0.819372	0.360906		0.694476	0.716447		1.3388	2.2467
1.04873	1.08747		1.13067	0.936987		1.63994	0.994511
0.846896	1.11158		0.517513	0.472429		1.13591	0.737013
0.754745	1.27514		0.331456	0.802559		1.14575	0.763712
0.640982	0.564588		0.502286	0.450239		1.42112	1.50968
0.370542	1.46765		0.451423	0.630267		1.64978	1.65967
0.809586	1.10516		0.351812	0.525901		2.78569	1.46489
0.725285	0.295098		0.400613	0.464558		1.58212	1.10417
0.715499	0.753842		0.34774	0.678582		1.00314	1.06619
0.601838	0.824487		0.824595	0.763405		1.76288	1.23642
0.697863	0.638405		0.838817	0.879579		1.41492	2.28469
0.66453	1.50293		0.999496	0.899122		2.82877	2.40564
0.548933	0.925494		0.465698	0.369285		1.25639	0.734684
0.40775	0.723398		0.339598	0.464558		0.683516	0.577892
0.59399	1.39867		0.809368	0.730765		1.40519	1.44912
0.695927	1.32652		0.405688	0.4176		1.98298	1.26097
0.619473	0.867776		0.900836	1.3611		1.74193	1.42242
1.11346	0.75551		1.09202	0.75947		1.17771	0.7974
0.764531	0.777947		0.547016	0.469783		1.78009	0.924984
0.372479	1.10516		0.516508	0.217961		0.976098	1.48944
0.341082	0.615968		0.6314	0.652457		1.6486	1.18051
0.309686	0.399357		0.97914	0.837778		1.34854	1.36185
0.286241	1.21259		1.4377	1.27886		1.38178	1.0549
0.284202	0.280668		0.440267	0.491972		1.00924	0.725724
0.674316	0.393018		0.567372	0.828685		1.11379	0.781811
0.623348	0.683279		0.659898	1.51901		1.4285	2.19957
0.215598	0.455574		0.40976	0.692968		1.76534	1.44912
0.535172	0.522885		0.504295	0.468493		1.83546	1.73367
0.446996	0.437892		0.302006	0.215314		1.88463	1.35056
0.254844	0.23421		0.519575	2.59687		0.871653	0.61373
0.354845	0.171654		1.28622	1.04135		1.45436	2.00031
0.509687	0.694538		0.985273	0.75818		1.04494	0.577892
0.499901	0.256646		0.737144	1.10921		2.51642	1.48514
0.776253	0.814812		0.705632	1.25931		2.24114	1.10417
0.392051	1.06987		1.21807	1.55816		1.87962	2.05174
0.615498	0.736242		0.491077	0.383671		2.21892	1.24538
0.568505	0.683279		0.774789	0.993105		1.58212	1.95551
1.13507	2.10288		0.40976	0.253179		1.44207	1.58817
1.08991	1.07947		0.289793	0.214025		1.34736	1.01243
1.13701	0.885375		0.650751	0.57157		1.27734	1.69551
0.813563	0.426632		1.12047	0.951305		3.40164	1.7627
0.923349	1.02333		0.992358	0.816878		1.68548	2.2691
1.09389	0.862938		1.41634	1.10012		1.12608	2.32052
1.06647	0.724982		0.80831	1.03613		0.669944	1.71575
1.29776	0.824487		0.33246	0.348452		1.32031	2.35188
0.976254	1.12284		0.462632	0.505001		1.68912	2.15925
0.715499	0.911066		1.60245	2.30718		1.85139	3.65998
1.06443	1.06345		0.619239	0.668132		0.70938	1.4045
0.66453	0.433055		1.08081	0.661618		1.69895	1.23642
0.74292	0.580686		0.648689	0.514162		1.09903	0.582371
0.815499	1.118		0.770718	1.07528		0.966264	0.972111
0.956682	1.27039		0.670049	1.13269		1.02154	0.627168
0.368504	0.31278		1.90948	1.95221		1.50717	1.40217
0.697863	0.670433		1.00457	1.10012		1.71125	1.67311
1.09776	1.02175		0.910036	0.777791		1.08792	2.15925
1.0155	1.06662		0.618182	0.460622		1.60916	1.9263
0.835071	0.935169		0.779865	0.947437		1.87352	1.82775
0.80765	0.62873		0.568376	0.580731		1.46784	1.07299
0.54302	0.585441		1.05744	1.11186		1.05114	1.16026
0.396027	0.867776		0.574456	1.45115		1.51829	0.423249
0.850769	1.10674		0.860178	0.690322		0.844511	2.06751
0.501837	0.214943		0.593808	0.481522		1.23426	2.61852
0.550869	0.458744		0.585665	0.628978		1.18755	0.718914
0.695927	1.1773		1.04729	1.02832		1.40755	1.41561
0.499901	1.37782		1.16319	1.14056		0.958889	2.53788
0.754745	0.840501		2.06915	1.80082		1.67564	2.12341
0.946794	0.489188		0.65276	0.717737		1.04612	1.736
0.558719	0.753842		0.554153	0.489394		1.75177	1.44464
0.441083	0.850094		0.574456	0.475008		1.46666	1.89942
0.40775	0.700961		0.504295	0.390185		3.82572	3.92428
0.417536	0.404195		0.672111	0.74773		1.19866	1.64193
0.262692	0.332048		1.1266	1.27886		1.69649	2.0383
1.00561	1.82213		1.63703	1.27757		2.07022	2.1166
0.784103	1.43395		0.961851	0.495908		1.93381	1.20954
0.921309	0.911066		0.514499	0.409728		1.04248	1.29913
0.444957	0.441062		0.84696	0.711222		1.14211	1.7627
0.490115	0.81965		1.12047	1.12095		1.53914	1.10417
0.601838	0.840501		0.430115	0.491972		1.21823	1.96662
0.443019	0.514877		0.873396	0.854742		1.08428	3.20071
0.707649	1.58317		0.622253	1.13011		1.4162	2.33163
0.392051	0.752256		0.730059	0.542866		2.08379	3.01041
0.599901	1.89595		0.753429	0.726898		0.894962	2.34059
0.509687	0.814812		0.804292	0.972205		1.47275	2.03615
0.3999	1.03301		1.3198	1.90261		2.19433	1.73367
0.331296	0.417039		0.73413	0.669422		1.22561	2.38539
0.462591	0.524469		0.542945	0.601563		1.40755	2.98353
0.764531	0.607877		0.553149	0.565056		1.38178	2.72585
0.715499	1.2688		1.50485	1.16662		2.19925	2.89626
1.02722	1.08589		0.554153	0.38496		1.86123	2.18398
0.715499	1.06028		1.19063	1.0309		0.848247	2.10997
0.470441	0.777947		0.688343	0.677293		1.29701	1.47385
0.368504	0.548574		0.464641	0.484169		1.50226	1.59032
0.946794	0.538982		1.34216	1.14314		1.44453	2.68571
0.364631	0.935169		1.49163	1.25931		1.44207	2.30923
0.217637	0.317618		0.717846	0.869128		2.09972	2.92529
0.443019	0.227787		1.04116	1.13405		1.23052	2.55132
0.42936	0.530892		0.670049	1.16275		1.40637	1.85911
0.527322	0.561419		0.686334	0.856032		2.63453	1.45593
0.296027	0.478011		1.21299	0.993105		2.05173	0.994511
0.427322	0.620723		1.14183	1.15488		1.94236	1.20058
0.72141	0.45716		0.84696	0.59247		1.65342	1.39088
0.386139	0.615968		0.596821	0.657682		1.47521	1.75822
1.02722	0.691286		1.89425	1.89481		1.35346	1.4045
0.862595	0.495611		0.760567	0.829974		2.14889	2.51548
1.05658	0.779531		0.307082	0.280594		1.11015	2.07862
0.427322	0.62873		0.904908	0.752955		1.71616	0.99666
1.12519	0.952769		0.561238	1.01916		0.835953	1.19843
0.47829	0.989636		1.52314	1.18229		1.2379	1.0101
0.831197	0.574263		0.424987	0.290976		1.63011	1.25434
0.539045	0.465167		0.93441	0.618528		1.67437	2.16821
0.740982	0.696123		1.25164	0.906925		1.40391	1.06619
0.541083	0.470004		0.8836	0.74773		1.24282	1.63727
0.782165	1.10833		0.854097	0.455465		1.35965	1.54767
0.444957	0.609545		0.716841	0.713801		1.30684	1.18714
0.629259	0.354483		1.08996	0.784306		1.36575	0.961001
0.690014	0.994473		0.492134	0.403214		1.40263	1.4269
0.444957	0.949599		0.892747	1.33369		1.43342	1.27011
0.462591	0.461913		1.82208	1.44457		1.99026	2.72155
0.627323	0.455574		0.871387	0.421535		1.19738	1.45593
0.682164	0.558167		0.616173	0.567634		1.48377	2.31604
0.619473	1.4372		0.746291	0.677293		1.62765	1.48514
1.05077	0.83408		1.12353	0.848228		1.3449	2.16821
0.537108	0.420209		1.25064	0.657682		1.4162	1.94189
0.343019	0.514877		0.681258	0.585956		1.22816	1.65967
0.444957	1.18372		0.719855	0.412375		0.87903	1.0506
0.32936	0.705798		0.834746	0.463268		1.23426	1.78743
0.446996	0.23421		0.766647	0.489394		2.77458	2.16588
0.411623	0.463581		0.54194	0.249243		2.01858	1.64408
0.47829	1.13084		0.635471	0.446304		0.867917	0.822128
0.284202	0.750672		0.827661	1.77605		0.833495	0.737013
0.860555	0.813228		1.46112	1.00613		1.61536	1.76951
0.462591	1.28482		2.14947	1.25144		1.85011	1.28122
1.03314	0.455574		0.797154	0.464558		1.15804	1.46041
0.744959	0.623975		0.331456	0.588535		1.80468	1.87255
0.605712	0.691286		0.429058	0.965691		1.15312	1.73152
0.580227	1.01533		0.378248	0.397989		1.19492	1.63297
0.929159	0.340055		0.526713	0.413664		2.39968	2.10549
0.821411	0.271076		0.67613	0.738637		0.824841	2.13004
1.21346	0.500448		0.809368	0.97872		1.12244	1.17818
0.697863	1.01374		0.877467	1.50069		2.28658	1.56577
0.733134	0.495611		0.607026	1.29582		1.58094	0.965301
0.65087	0.352899		0.542945	0.631625		1.73465	0.79973
0.535172	0.4283		0.895761	0.900411		0.945414	0.530943
0.578291	0.319202		0.492134	1.32846		1.59569	0.472706
0.59399	0.418625		0.658893	1.49288		0.80763	0.880187
0.446996	0.367329		0.655827	0.716447		2.27055	0.750452
0.358718	0.251808		0.602955	0.262272		1.09785	0.624839
0.431297	0.163647		2.02236	1.32452		0.828578	0.705654
0.797864	0.359322		1.12153	0.583309		1.29937	0.961001
0.474417	0.285506		0.575514	0.541577		1.1544	1.1221
0.443019	0.247055		0.508366	0.535062		1.13473	1.21617
0.390114	0.344892		0.829671	1.15617		0.928203	0.741314
0.460655	0.261485		1.0981	0.871707		1.07936	0.963152
0.40775	0.801968		1.14997	1.72645		2.03697	1.00795
1.11152	0.964029		0.534802	0.495908		1.76042	0.5847
1.56433	0.968783		1.34824	2.27325		1.53176	1.3081
0.972279	0.964029		2.83474	2.88269		1.5711	1.0549
0.607751	0.40578		0.529727	0.609435		1.67928	1.16026
0.497964	0.365744		0.566367	0.53893		1.10759	0.741314
0.713562	0.44273		0.595817	0.447593		1.41748	1.02372
0.658719	1.19499		0.852035	0.499776		1.68292	0.830909
0.341082	0.134705		1.44584	1.68994		0.816284	0.949712
0.370542	0.434723		0.789012	0.602921		2.34805	1.43138
0.882165	0.407448		0.559229	0.568991		1.62883	1.28122
0.450869	0.420209		0.462632	0.626399		0.972362	1.10883
0.599901	0.28709		1.26486	1.14443		1.33998	1.0058
1.3311	0.901473		0.855102	0.690322		1.14329	0.772671
0.933135	0.801968		0.881538	0.72554		1.63503	1.89709
1.14486	0.646412		0.80223	0.672068		1.08428	1.32153
1.11937	0.502032		0.644618	0.366706		0.982295	2.02271
1.29776	0.583856		1.35538	1.17056		1.18627	2.21749
0.541083	0.247055		1.36754	0.863903		1.60306	1.71127
1.01346	0.529307		0.782931	0.897832		1.22561	3.04625
0.972279	0.511707		1.10524	1.22667		1.60424	3.18064
1.52906	0.792375		0.592803	0.464558		1.20849	1.14897
1.14486	0.822819		0.75142	0.424114		2.10955	1.25434
1.91724	0.829242		0.884605	1.0231		1.22689	2.18613
0.7998	0.814812		0.834746	1.01265		1.03875	2.13918
0.446996	0.766686		0.767651	0.584599		1.59815	2.07628
0.556782	0.736242		0.508366	0.497197		2.37637	2.10764
0.784103	0.53573		0.810372	0.691611		1.2797	1.29465
1.47024	0.598286		1.00864	0.606788		1.2441	1.57473
0.942921	0.486018		0.410764	0.643364		1.2023	1.40217
0.439146	0.635151		1.7285	1.16533		0.956429	1.48281
0.987977	0.593448		0.664974	1.05438		1.24537	1.79872
0.831197	0.543737		1.02593	0.62511		0.870375	1.9263
0.746895	0.519716		1.16319	1.83088		1.4937	0.842198
0.819372	0.607877		0.669045	2.93358		1.27242	0.891476
0.772379	0.959192		1.37669	1.63905		0.620769	0.826608
0.640982	2.13975		0.911041	2.61777		1.00924	0.891476
0.556782	1.1517		1.47128	2.5721		0.992031	0.7974
0.517536	0.489188		0.66804	0.446304		1.6486	0.862268
0.856682	1.49817		0.741215	0.445014		1.47275	1.18929
0.584204	0.890213		0.721917	0.735991		1.47639	0.624839
1.12916	0.930332		0.710708	1.08831		1.12116	0.972111
0.858618	0.790791		1.18962	0.779081		1.7911	0.772671
0.32151	0.647996		0.661907	0.775145		0.849428	0.412139
0.313661	0.372167		0.385333	0.39541		2.86929	1.45593
0.631196	0.684947		1.3411	1.14443		2.08379	2.21068
0.603776	0.343224		0.813439	0.779081		1.91286	1.34178
0.448932	0.551744		0.969993	1.0153		1.38542	0.716765
0.790014	0.656004		0.82359	0.552027		1.40883	1.00795
0.776253	0.595116		1.58717	0.97743		1.28835	1.3149
1.03314	0.434723		0.536864	0.61466		2.31117	2.47947
0.252906	0.487604		1.08795	2.2915		1.9104	1.08411
0.270542	0.489188		0.86224	0.730765		1.10031	0.837719
0.639045	0.970452		1.25672	1.29188		0.996948	1.43353
0.786141	0.37692		1.0493	1.22274		1.87844	1.29465
1.12722	0.500448		0.782931	0.567634		1.55271	1.39088
0.519473	0.81965		1.33402	1.38329		1.3511	1.91519
0.513561	1.05219		0.635471	0.580731		1.89073	1.4269
0.713562	0.4283		0.964918	1.37155		2.55831	1.41113
0.813563	0.514877		0.760567	0.665554		0.896241	1.86126
0.725285	0.782784		0.720912	0.460622		0.984656	1.19843
0.80765	0.647996		1.20284	0.862614		1.95957	1.03931
0.686141	0.893466		1.0198	0.621174		1.44079	1.41328
0.619473	0.639989		1.11439	0.516741		1.34854	1.34393
0.703776	0.644826		1.26893	0.750377		1.03875	0.974441
0.707649	0.452321		0.66804	0.660329		0.757275	0.517503
0.597863	0.263069		1.21606	0.81172		1.77399	0.920504
0.521409	0.649581		0.637533	0.568991		1.44207	0.546533
0.582266	0.761931		1.56581	0.947437		1.64122	1.66648
0.682164	0.322371		1.17334	0.665554		1.30192	1.03483
0.670442	0.429885		0.66804	1.14185		2.37135	1.60161
1.17422	2.87274		1.42855	1.53461		0.748719	0.59133
1.10174	0.74108		0.49721	0.431918		0.985934	0.956522
1.1154	0.433055		0.755438	0.454107		0.849428	0.609249
0.69399	0.381758		0.743277	0.508937		1.08674	0.631649
0.709688	0.384927		1.41126	0.843003		1.69404	1.71127
0.378392	0.864524		0.75142	0.619885		0.847067	1.39984
0.609687	0.389766		1.5445	0.843003		1.60552	2.4594
0.607751	0.396188		2.34367	1.7865		0.833495	1.18051
0.654744	0.31278		1.11946	1.06748		0.668763	1.88366
0.705713	0.601538		1.4662	2.49637		1.0118	2.13918
0.62141	0.952769		1.1164	1.24757		1.07691	1.33282
1.18798	1.01691		0.927273	1.36497		1.01298	1.33049
0.619473	0.864524		1.38483	0.94608		1.94974	2.325
0.917436	0.437892		1.44077	1.37807		1.18017	2.3698
0.997763	0.352899		1.13876	0.908283		1.15558	2.00694
1.18991	1.12117		1.03	1.08573		1.45554	1.3373
1.57809	0.901473		0.754433	0.721672		0.839691	1.51631
0.731196	0.607877		1.67055	1.16798		1.10267	1.64641
0.66453	1.01215		1.28929	1.84785		1.29327	1.43801
0.435171	0.439476		2.34266	2.47031		2.23613	1.06852
0.970341	1.1597		1.05136	1.72516		1.01662	0.645087
0.458718	0.423462		1.29436	0.950015		1.23544	0.371822
0.613562	0.494025		1.35432	1.72516		1.6547	1.22065
0.533234	0.720228		1.35538	1.00091		1.33261	1.31257
0.54302	1.08747		0.884605	1.04529		0.950331	0.918354
0.668505	0.530892		1.62481	1.16139		1.10641	0.376301
0.644958	0.346476		1.09609	2.68298		1.14329	0.580041
0.674316	0.291929		1.76514	1.15488		0.819923	0.710135
0.592052	1.36497		2.39754	1.66382		1.64978	2.45277
1.0841	1.42753		0.815448	0.970916		1.33015	0.741314
0.897864	0.824487		0.80223	1.80082		0.475805	0.759411
0.756681	1.20141		0.791074	1.43941		0.817464	0.698846
0.90765	0.465167		1.19269	1.3898		0.985934	1.59247
0.546894	0.757094		0.965922	0.909572		1.12982	0.710135
0.401837	0.470004		0.882543	0.72554		2.33821	1.27226
0.701838	0.888629		0.855102	1.10921		1.27114	1.53208
0.356781	0.189252		0.918126	0.912151		1.27478	1.45808
0.470441	0.585441		1.21199	1.00091		1.06097	1.01458
0.6998	1.31367		0.845955	0.777791		1.1667	0.712284
0.609687	0.781116		0.461627	0.708576		0.914631	0.828758
0.856682	0.914318		1.50686	1.16404		1.17161	1.58817
0.72926	1.45647		0.641604	0.63685		1.64358	1.27674
0.803777	0.6897		1.39096	1.27363		1.31658	1.20954
0.723348	0.656004		1.16218	0.674647		1.44207	2.91418
0.744959	0.744249		0.826657	1.81392		1.76534	0.712284
0.3999	0.710552		1.60546	1.41722		1.83044	1.21402
0.790014	0.795545		1.85254	1.65472		0.87903	1.59928
1.15658	0.766686		0.730059	1.03613		1.57602	2.06518
1.6839	1.46606		0.733073	1.18101		1.32651	1.96662
1.77412	0.694538		1.95934	2.05013		1.50472	2.11445
0.929159	0.665679		0.946624	1.60383		1.40637	1.66863
1.07422	0.490856		0.81751	1.93396		0.851984	1.97791
0.701838	1.40993		1.2435	1.18358		1.17161	2.19724
0.690014	0.739412		0.941548	2.37375		1.48013	1.34841
0.872379	0.850094		0.706637	1.24099		1.02773	1.57007
0.531297	1.73872		0.746291	1.2606		1.44689	0.795249
1.32325	0.957606		1.00256	1.20842		1.03147	1.32816
1.25261	1.01691		1.45599	1.08051		1.09658	1.01458
1.13895	1.02659		1.37875	1.06096		1.05478	2.47731
0.891951	0.911066		0.776798	1.37807		1.14447	0.761562
0.895826	0.907896		1.48349	1.73819		0.865458	1.05723
0.582266	0.965613		0.569381	0.508937		1.44945	1.64193
0.937008	0.914318		1.27094	3.09929		0.689613	1.16689
1.30357	1.09715		1.76614	0.996973		1.49124	1.31257
1.39379	1.50935		1.14082	1.15359		2.10837	2.75954
1.19583	1.22226		2.26943	2.06316		1.52439	1.36633
0.47829	0.561419		1.65532	1.40548		1.09658	1.2857
0.544958	0.415455		0.701561	0.75947		0.989573	0.871406
0.448932	0.230957		0.980145	1.98614		1.06707	2.21534
0.840983	0.959192		1.03915	1.98614		0.995768	1.26545
0.784103	0.89505		1.13268	2.63473		1.29199	1.06852
0.839046	1.76758		1.23943	0.81301		1.86732	1.20291
0.788078	0.490856		1.00658	0.98917		2.07759	1.3081
0.676355	0.667263		0.523646	0.407149		1.47639	1.36185
0.80765	1.54463		1.67055	0.891318		1.07445	0.786111
0.809586	0.959192		2.06302	1.24364		1.00196	2.69001
0.56453	0.712137		1.3198	1.21622		2.97747	1.93311
1.05658	0.939924		1.41433	1.95615		1.28963	1.41328
0.809586	0.893466		1.11946	1.03742		1.04248	1.22298
1.05658	0.62556		1.0198	0.968269		1.458	2.32267
1.0155	0.678524		1.03101	1.0818		1.04612	0.654047
0.541083	0.585441		3.54751	2.64518		1.12608	2.69897
0.474417	0.344892		1.21098	1.38193		1.08556	1.49624
1.04873	0.633567		1.37267	0.839067		1.09166	1.25882
0.631196	0.449151		1.57601	0.799913		1.6486	1.0058
0.405813	0.603123		1.77936	1.55158		1.619	1.67776
1.13701	0.790791		1.9512	1.58944		1.76416	0.752603
0.854745	0.351314		0.90697	0.521966		1.39162	1.29251
0.427322	0.336801		1.92677	1.8661		2.72423	1.64641
1.12916	0.941508		2.11795	3.72304		3.19265	1.5948
0.942921	0.460329		2.65175	1.96395		2.13168	1.58584
0.782165	0.627144		0.739206	0.897832		4.50549	3.39119
0.880229	0.72665		1.60652	1.69646		2.68607	1.84782
0.972279	1.26397		1.28823	1.0727		1.0412	1.0997
0.870341	1.82213		0.933406	0.819524		1.58585	1.76503
1.36443	1.50935		0.988287	1.23319		1.24783	1.47832
0.454845	0.827657		0.552091	0.716447		1.22689	1.70912
0.7998	0.893466		1.00864	1.00349		1.45181	1.91734
0.919373	0.659256		1.6899	1.37671		1.7911	1.19377
0.64302	0.683279		1.82716	1.29453		0.898601	1.88151
1.17422	0.994473		1.35432	1.31543		0.746261	2.07414
1.3997	1.27197		0.753429	0.782948		2.30871	1.88831
1.91133	1.34737		1.20591	2.1336		1.50098	1.54104
1.63487	1.56548		0.91305	1.66904		1.04868	1.50287
1.04873	0.840501		0.658893	1.10921		1.58458	1.00347
1.12916	1.19499		0.941548	0.822103		0.767111	1.26097
1.11744	0.769938		1.35538	0.612014		1.88709	1.42457
0.678291	0.935169		0.955771	1.18101		1.13591	2.13685
0.815499	1.06662		1.47228	1.37155		1.14703	1.04379
0.72926	1.15812		1.23742	1.07657		1.57966	2.1123
1.34873	1.0009		1.85967	1.14056		0.710561	0.683076
1.02916	0.782784		0.917121	0.598985		1.24046	0.645087
0.7998	1.40667		0.672111	0.635492		1.12608	0.817469
0.511623	0.383343		0.960846	0.888672		1.17161	1.47618
0.464631	0.941508		1.11846	1.24235		1.13218	1.56577
0.5156	0.757094		1.28115	1.45766		0.787961	1.07515
1.00368	0.279083		1.44077	1.87391
0.392051	0.418625		1.51093	1.31279
1.01346	0.497279		0.819519	0.913508
0.58614	0.92391		0.921192	0.784306
0.364631	0.288758		1.40312	1.16139
0.791951	0.838917		1.15098	1.91177
0.56453	0.676856		1.02794	1.09096
0.974318	0.71856		1.26486	1.22016
0.633234	1.04418		0.632457	0.579374
0.72141	1.35221		1.11946	1.94835
0.417536	1.97293		0.672111	0.815588
1.14292	1.58158		0.599888	0.852164
0.782165	0.858101		1.66241	1.44199
0.488076	0.401025		2.1169	2.03181
0.421511	0.577433		0.69141	1.13792
1.14873	0.944762		0.914055	0.858678
1.18013	1.00248		0.887618	1.22925
0.674316	0.587025		0.671054	1.29582
0.823349	0.962361		1.14897	0.938276
1.01744	1.00248		1.78444	2.35549
0.99389	1.18056		1.10017	0.852164
0.539045	1.10199		1.03	1.4785
1.09389	0.566174		0.536864	1.79302
0.74292	0.838917		0.562296	0.900411
1.01744	1.03459		1.10117	0.733412
1.07228	0.5967		0.895761	0.936987
0.7998	0.429885		1.16826	1.45244
1.15271	1.6569		1.09403	0.743862
0.774317	1.88469		1.60446	1.22403
0.639045	1.59434		1.30859	0.857389
0.946794	1.27039		1.30959	1.02439
0.625386	0.681693		0.574456	0.644653
0.492051	0.947931		1.4479	0.866482
0.909587	1.118		1.1266	0.990459
0.825285	0.768354		1.06151	0.994395
1.60164	1.30567		1.34517	1.78521
1.81326	1.96009		0.428053	0.683808
1.08798	1.8414		0.833742	1.09618
1.07422	0.559835		1.11539	0.613303
0.978191	0.699375		1.03815	0.674647
0.882165	1.44521		0.559229	0.609435
0.813563	0.354483		1.06051	1.26189
0.558719	0.686531		1.57802	1.33104
1.37401	0.375336		1.49565	1.62466
0.656681	0.712137		0.758505	1.59725
0.619473	1.05703		0.918126	1.03613
0.603776	0.522885		1.22727	0.734701
0.505814	0.765101		1.58416	0.875643
0.511623	1.44679		1.03407	0.796045
1.63885	0.734657		0.531789	0.59376
0.835071	0.877368		0.887744	0.659328
1.04486	1.69385		1.00087	1.53816
0.482265	0.715391		0.617691	1.2085
1.9152	1.03776		1.70133	1.27133
0.919373	0.546989		1.17298	0.768672
0.53721	0.613131		0.950232	0.988991
0.380226	1.18798		0.880986	0.564672
0.473907	0.504951		0.491133	0.470832
0.716313	0.489188		1.11058	0.863327
0.785223	0.531977		0.742668	0.768672
0.446282	0.743916		0.597505	0.894335
0.40775	0.597368		1.4684	1.224
0.633642	1.38641		1.42285	1.25501
0.473907	0.550076		0.891167	1.28683
0.677781	0.5771		0.757851	0.423504
0.708057	0.437309		0.918198	0.470832
0.377474	0.635735		1.26926	1.34966
0.619881	0.615384		1.0954	1.33416
0.870647	0.755175		1.10716	0.816
0.473907	0.324624		1.1865	1.11384
0.548219	0.293096		0.865802	0.564672
0.625386	0.430551		0.987357	0.816
0.669525	0.196092		1.34175	0.863327
0.495926	0.387764		0.622781	0.878831
1.13783	0.601872		1.18992	0.988991
0.628139	0.7259		0.823675	0.549168
0.600615	0.329127		1.13928	0.816
0.942207	0.748419		1.06836	1.55366
0.669525	0.520716		1.29287	1.56917
0.322326	0.180329		1.49876	1.632
0.341592	0.376503		0.717304	0.627504
0.333335	0.6515		0.702121	1.0355
0.319574	0.254729		0.989025	1.2395
0.517944	0.369665		0.837103	1.25501
0.231398	0.114936		0.754429	1.31784
0.914684	0.5027		1.11734	1.13016
0.305813	0.139791		1.25908	0.737664
0.564836	0.36516		0.479373	0.690336
0.286547	0.317868		1.0667	1.16117
0.754847	0.95352		1.33333	1.45901
0.286547	0.579351		0.573808	0.376992
0.37197	0.329127		1.14604	0.800496
0.33884	0.509456		0.604263	0.72216
0.479412	0.518463		1.73169	1.2395
0.617129	0.475676		0.379759	0.329664
0.256271	0.313364		0.482708	0.596496
0.652908	0.504951		0.843861	0.957167
0.281042	0.128532		0.813494	0.627504
0.46565	0.435056		1.23714	1.36517
0.404997	0.288509		0.73591	0.768672
0.47666	0.338136		0.769612	1.11384
0.402245	0.299852		0.676844	0.643008
0.796233	0.236712		0.578898	0.643008
0.622634	0.376503		1.43627	0.72216
0.809994	0.432804		0.828678	0.486336
0.322326	0.272744		1.22195	0.50184
0.225893	0.295347		0.784795	0.831504
0.37197	0.263736		0.545197	0.219504
0.460145	0.33138		0.793221	0.831504
0.619881	0.491439		0.683514	0.564672
0.611624	0.423795		0.426977	0.09384
0.473907	0.313364		0.394943	0.753168
0.611624	0.417039		0.675089	0.957167
0.380226	0.243468		0.95699	0.596496
0.402245	0.344892		1.2051	0.988991
0.515192	0.326876		0.835436	0.470832
0.680534	0.419292		0.908017	1.14566
0.531705	0.207353		0.514742	0.455328
0.567587	0.595116		0.931626	0.612
0.639147	0.628979		0.87256	0.282336
0.66402	0.430551		1.08864	0.941663
0.542715	0.349397		0.545197	1.34966
0.443529	0.135288		1.36203	1.08283
0.713562	0.453072		0.661573	0.831504
0.515192	1.03918		0.683514	1.00449
1.01387	1.37056		1.48692	1.17667
0.402245	0.646995		1.55616	1.05101
0.903675	0.619887		1.3249	1.19299
0.553724	0.53648		0.929959	0.831504
0.589605	0.466668		1.35869	1.224
0.460145	0.831828		1.90556	1.88333
0.589605	0.741663		1.24056	1.60099
0.727323	0.369665		0.963748	1.49083
0.628139	0.390015		1.22029	1.56917
0.652908	0.3539		1.34008	2.10283
1.09929	0.39452		1.51228	1.78867
0.556476	0.243468		0.928291	1.11384
1.27279	0.712388		1.07179	1.33416
0.911931	0.626727		1.40091	1.25501
1.65577	0.723647		1.04809	1.224
0.625386	0.243468		1.05151	2.33784
0.666773	0.356153		0.987357	0.957167
0.559229	0.48018		1.17974	1.6165
0.570339	0.545571		0.614355	0.831504
0.520697	1.11808		1.86668	1.11384
0.994602	0.595116		1.06161	1.08283
0.655661	0.220947		0.702121	1.09834
0.539963	0.356153		0.933382	1.14566
0.600615	0.392268		1.09873	0.894335
0.490421	0.2976		2.00508	1.92984
0.680534	0.511707		1.56968	1.25501
0.471155	0.335883		0.99745	1.00449
0.391236	0.381008		1.30129	1.38067
0.484916	0.680775		1.51904	1.38067
0.986346	0.608628		0.801734	0.941663
0.487668	0.430551		0.394943	0.596496
0.416007	0.2976		0.666663	1.06733
0.487668	0.277248		0.641387	0.486336
0.416007	0.340388		1.02281	0.926159
0.6419	0.509456		1.0093	1.05101
0.424263	0.335883
0.410502	0.381008
0.457292	1.44046
0.316821	0.241215
0.567587	0.396771
1.01662	0.784452
0.528953	0.608628
0.66402	1.1542
0.647405	0.518463
0.686039	0.556832
0.708057	0.545571
0.418758	0.324624
0.460145	0.387764
0.743837	0.556832
1.08828	1.45622
0.672276	0.36516
0.404997	0.33138
0.611624	0.640239
0.512439	0.360656
0.655661	0.529724
0.391236	0.207353
0.567587	0.308859
0.559229	0.399024
0.548219	0.371916
0.655661	0.493692
0.727323	0.518463
0.457292	0.3539
0.652908	0.351648
0.617129	0.540984
0.812747	0.822819
0.47666	0.958023
0.46565	0.658256
0.528953	0.642492
0.617129	0.667263
0.46565	0.572595
0.633642	0.874616
0.6419	0.608628
0.553724	0.784452
0.501431	0.694287
0.93395	0.752924
0.878904	1.23085
0.584102	0.608628
0.677781	0.773192
0.639147	0.493692
0.752094	0.985131
0.93395	1.46981
0.793481	0.766436
0.355353	0.306608
0.895418	0.847592
0.509687	0.220947
0.504182	0.444065
0.534458	0.559083
0.6998	0.669516
0.859536	0.482432
0.727323	0.989636
0.542715	0.755175
0.528953	0.529724
0.914684	1.72905
0.84027	1.01215
0.515192	0.876951
0.757599	0.890463
0.947712	1.60277
0.702552	0.595116
0.531705	0.604124
0.548219	0.441812
