# Supplementary material for: An optimized CRISPR/Cas9 approach for precise genome editing in neurons
Source: eLife. 2021 Mar 10;10:e65202. doi: 10.7554/eLife.65202 (PMC7946428; doi:10.7554/eLife.65202)
Supplement: Figure 2—source data 1. [file elife-65202-fig2-data1.xlsx]

## Sheet: Fig2
SEP + /mCherry + cells
%	SEP-GluA1	SEP-GluA2	SEP-GluA3	GFP-Gephyrin
Exp.#1	23.68 (9/38)	40.00 (34/85)	22.45 (11/49)	38.78 (19/49)
Exp.#2	21.67 (13/60)	37.35 (31/83)	12.66 (10/79)	50.00 (53/106)
Exp.#3	20.19 (21/104)	34.52 (29/84)	26.47 (27/102)	36.36 (12/33)
Exp.#4		43.75 (35/80)
Ave.	21.85	38.91	20.53	41.71
