# Supplementary material for: An optimized CRISPR/Cas9 approach for precise genome editing in neurons
Source: eLife. 2021 Mar 10;10:e65202. doi: 10.7554/eLife.65202 (PMC7946428; doi:10.7554/eLife.65202)
Supplement: Figure 3—source data 1. [file elife-65202-fig3-data1.xlsx]

## Sheet: Fig3
SEP + /mCherry + cells
%	SEP-NR1	SEP-NR2A	SEP-NR2B
Exp.#1	14.67 (11/75)	18.46 (12/65)	30.00 (15/50)
Exp.#2	16.30 (15/92)	17.14 (12/70)	31.11 (14/45)
Exp.#3	14.58 (7/48)	14.47 (11/76)	21.43 (12/56)
Ave.	15.18	16.69	27.51
