# Supplementary material for: An optimized CRISPR/Cas9 approach for precise genome editing in neurons
Source: eLife. 2021 Mar 10;10:e65202. doi: 10.7554/eLife.65202 (PMC7946428; doi:10.7554/eLife.65202)
Supplement: Figure 4—figure supplement 2—source data 1. [file elife-65202-fig4-figsupp2-data1.xlsx]

## Sheet: Fig4_supplement2
%	KI	WT	KO
Exp.#1	40.00 (34/85)	58.82 (50/85)	1.18 (1/85)
Exp.#2	37.35 (31/83)	45.78 (38/83)	16.87 (14/83)
Exp.#3	34.52 (29/84)	46.43 (39/84)	19.05 (16/84)
Ave.	37.3	50.3	12.4
