# Supplementary material for: An optimized CRISPR/Cas9 approach for precise genome editing in neurons
Source: eLife. 2021 Mar 10;10:e65202. doi: 10.7554/eLife.65202 (PMC7946428; doi:10.7554/eLife.65202)
Supplement: Figure 4—figure supplement 3—source data 1. [file elife-65202-fig4-figsupp3-data1.xlsx]

## Sheet: Fig4_supplement3
		Collected cell body GluA2																				%
		CS1 R1	CS1 R2	CS1 R3	CS1 R4	CS1 R5	CS2 R1	CS2 R2	CS2 R3	CS2 R4	CS2 R5	CS3 R1	CS3 R2	CS3 R3	CS3 R4	CS3 R5		Pooled		Count less than 1000	3	1.22449
		8192.88	5518.94	6586.07	4223.67	3683.02	3682.71	2508.66	5216.73	4055.39	1816.11	2235.2	4801.1	4728.95	2921.58	1794.99		668.081
		2839.7	14451.2	3505.76	3147.83	4781.19	1268.46	6375.56	2708.18	2517.27	4860.27	1922.31	3957.27	3138.86	5553.15	6454.91		800.422		Considering values of less than 1000 to be "not-detectable"
		6146.35	4915.06	3082.31	5503.08	6891.28	668.081	3520.04	4621.19	1371.37	5354.38	3559.02	6016.98	3867.73	3649.63	5668.98		844.25
		3318.75	8359.09	3660.63	6073.5	2510.93	2246.82	3409.14	2412.85	4349.62	3006.17	5690.17	6850.6	3275.57	8930.51	9178.83		1062.29
		9379.73	9378.33	5624.07	4675.19	3000.16	6733.75	3546.6	4375.29	3831.48	4392.04	3076.64	2513.35	4389.44	8271.55	8314.92		1188.23
		4816.69	5920.36	7278.53	7228.21	1252.8	5012.97	5480.13	1188.23	2439.1	1988.39	2278.11	6696.23	3878.15	4795.5	5491.47		1252.8
		7609.02	12601.2	6769.26	2704.73	5064.14	5339.14	5826.8	1325.33	2752.54	4165.51	2535.84	3795.12	8192.67	2506.16	3273.76		1268.46
		2964.56	2078.42	4071.57	3209.89	2714.12	4082.78	4707.36	1358.49	6444.15		4116.49	6427.75	3592.38	3162.07	6253.08		1325.33
		6203.75	6046.4	7907.18	3042.04	3501.75	6185.15	2390.47	4240.6	3955.86		7642.29	5861.29	5065.58	3960.36	14517.8		1347.22
		3996.26	5750.4	3157.79	3028.82	8657.07	5865.88	2458.14	3602.88	1756.9			3553.14	6843.93	2270.27	8994.21		1358.49
		7553.37	5512.62	4503.85	11608.9	3487.95	1062.29	4996.78	844.25	2258.83			4160.04	5768.72	3186.48	4901.42		1371.37
		4835.31	10376.4	5080.81	4016.37	7983.21	7053.67	4473.79		4129.38			3181.67	13251.2	4552.65	5338.88		1599.12
		9438.3	4751.05	8362.26	7343.01	6999.63	5587.25	2901.86		1599.12					5143.98	6099.72		1641.13
		4540.5	2000.59	3699.33	3135.41	7311.69	800.422	2073.4		2618.72					3973.19	6562.23		1756.9
		3805.28	13316.2	3675.11	3200.79	10133	9609.31	4159.15		8031.99					7212.55			1794.99
		2807.12	5222.87	4985.09	4959.88		4685.36	6686.66		6308.22					3090.51			1816.11
		4692.41	8879.32	4072.73	4499.34		5388.15	6526.6		5779.74					5368.22			1832.89
		10523.9	8672.23	2843.42	14710.3		6697.19	5676.57		4315.52					2273.94			1922.31
		4054.4	1998.55	7456.96	7856.1					2937.89					3280.94			1988.39
			5906.9	5851.99	6584.75					4594.99					4419.63			1998.55
					5571.87					1347.22					3650.74			2000.59
					5486.82					1641.13								2073.4
					2664.45					1832.89								2078.42
					6571.41					3411.16								2235.2
					3867.36													2246.82
																		2258.83
																		2270.27
		cs = coverslip																2273.94
		R = region																2278.11
																		2390.47
																		2412.85
																		2439.1
																		2458.14
																		2506.16
																		2508.66
																		2510.93
																		2513.35
																		2517.27
																		2535.84
																		2618.72
																		2664.45
																		2704.73
																		2708.18
																		2714.12
																		2752.54
																		2807.12
																		2839.7
																		2843.42
																		2901.86
																		2921.58
																		2937.89
																		2964.56
																		3000.16
																		3006.17
																		3028.82
																		3042.04
																		3076.64
																		3082.31
																		3090.51
																		3135.41
																		3138.86
																		3147.83
																		3157.79
																		3162.07
																		3181.67
																		3186.48
																		3200.79
																		3209.89
																		3273.76
																		3275.57
																		3280.94
																		3318.75
																		3409.14
																		3411.16
																		3487.95
																		3501.75
																		3505.76
																		3520.04
																		3546.6
																		3553.14
																		3559.02
																		3592.38
																		3602.88
																		3649.63
																		3650.74
																		3660.63
																		3675.11
																		3682.71
																		3683.02
																		3699.33
																		3795.12
																		3805.28
																		3831.48
																		3867.36
																		3867.73
																		3878.15
																		3955.86
																		3957.27
																		3960.36
																		3973.19
																		3996.26
																		4016.37
																		4054.4
																		4055.39
																		4071.57
																		4072.73
																		4082.78
																		4116.49
																		4129.38
																		4159.15
																		4160.04
																		4165.51
																		4223.67
																		4240.6
																		4315.52
																		4349.62
																		4375.29
																		4389.44
																		4392.04
																		4419.63
																		4473.79
																		4499.34
																		4503.85
																		4540.5
																		4552.65
																		4594.99
																		4621.19
																		4675.19
																		4685.36
																		4692.41
																		4707.36
																		4728.95
																		4751.05
																		4781.19
																		4795.5
																		4801.1
																		4816.69
																		4835.31
																		4860.27
																		4901.42
																		4915.06
																		4959.88
																		4985.09
																		4996.78
																		5012.97
																		5064.14
																		5065.58
																		5080.81
																		5143.98
																		5216.73
																		5222.87
																		5338.88
																		5339.14
																		5354.38
																		5368.22
																		5388.15
																		5480.13
																		5486.82
																		5491.47
																		5503.08
																		5512.62
																		5518.94
																		5553.15
																		5571.87
																		5587.25
																		5624.07
																		5668.98
																		5676.57
																		5690.17
																		5750.4
																		5768.72
																		5779.74
																		5826.8
																		5851.99
																		5861.29
																		5865.88
																		5906.9
																		5920.36
																		6016.98
																		6046.4
																		6073.5
																		6099.72
																		6146.35
																		6185.15
																		6203.75
																		6253.08
																		6308.22
																		6375.56
																		6427.75
																		6444.15
																		6454.91
																		6526.6
																		6562.23
																		6571.41
																		6584.75
																		6586.07
																		6686.66
																		6696.23
																		6697.19
																		6733.75
																		6769.26
																		6843.93
																		6850.6
																		6891.28
																		6999.63
																		7053.67
																		7212.55
																		7228.21
																		7278.53
																		7311.69
																		7343.01
																		7456.96
																		7553.37
																		7609.02
																		7642.29
																		7856.1
																		7907.18
																		7983.21
																		8031.99
																		8192.67
																		8192.88
																		8271.55
																		8314.92
																		8359.09
																		8362.26
																		8657.07
																		8672.23
																		8879.32
																		8930.51
																		8994.21
																		9178.83
																		9378.33
																		9379.73
																		9438.3
																		9609.31
																		10133
																		10376.4
																		10523.9
																		11608.9
																		12601.2
																		13251.2
																		13316.2
																		14451.2
																		14517.8
																		14710.3
