# Supplementary material for: An optimized CRISPR/Cas9 approach for precise genome editing in neurons
Source: eLife. 2021 Mar 10;10:e65202. doi: 10.7554/eLife.65202 (PMC7946428; doi:10.7554/eLife.65202)
Supplement: Figure 4—source data 1. [file elife-65202-fig4-data1.xlsx]

## Sheet: Fig4
immunofluorescence signal
SEP-GluA1	anti-PSD95		SEP-GluA2	anti-PSD95		SEP-GluA3	anti-PSD95
0.318406	0.985415		1.60156	0.776426		0.887427	1.84898
0.606673	0.679334		0.614973	0.945445		0.768099	1.21256
1.37869	1.738		0.768849	0.780979		1.12692	0.837602
0.637151	0.831602		1.28421	0.71861		1.45528	1.25851
0.474975	0.722603		0.684346	0.732144		0.938756	1.60908
0.886553	1.22886		2.30719	1.96598		0.777686	1.92803
1.05049	1.40204		1.44704	1.21756		0.915812	0.975492
0.670432	0.855503		1.09701	0.771935		1.17824	1.49771
0.379361	0.760001		0.915043	1.30887		0.791043	1.11774
0.480582	0.942145		1.6182	1.89363		0.438503	0.925233
1.02492	1.39009		0.915958	1.24107		1.10521	1.19963
0.810904	1.45273		1.37859	0.783661		0.672148	0.91874
2.83165	1.64394		1.68606	1.13349		0.773108	1.28656
0.513501	0.762988		0.944026	1.18681		0.924966	0.833983
0.582866	0.565905		1.42638	0.895737		1.16489	1.33895
1.68344	2.75175		1.13616	0.526079		1.64551	1.27938
0.563942	0.851073		1.6142	1.24469		0.738476	1.16369
0.243796	1.0123		0.948048	1.33687		0.781025	0.906547
0.532063	1.06011		1.43132	0.958105		1.54789	1.19244
0.868354	1.05259		1.23516	0.442006		1.14528	1.03299
0.898807	1.0974		1.02823	0.79813		0.82985	0.868481
0.423833	1.20341		1.66787	1.75262		1.49615	1.91654
0.47744	0.934625		1.29655	1.12176		1.19451	2.66071
0.796185	1.03919		0.841946	0.696906		1.56165	1.67084
0.323312	0.716731		1.30611	0.88582		1.15988	0.972617
0.723677	0.680879		0.990289	0.943636		0.53028	0.785162
0.888318	1.21691		1.31413	1.94696		1.43233	0.999184
0.64312	0.93617		0.931705	0.926485		0.874501	0.696787
0.650468	0.570335		1.33509	1.10997		1.67096	1.34039
0.897768	0.50914		1.02761	0.312716		1.58128	1.21613
0.460618	0.777927		0.811728	0.387745		1.10855	1.15794
1.01301	0.406117		0.60046	0.394107		0.660892	0.933857
0.335566	0.813779		0.687431	0.590256		1.23248	2.73902
0.501609	1.03765		1.12969	0.345272		1.77361	1.66871
0.301947	1.14963		0.56007	0.745741		1.07435	1.31025
1.07817	0.8929		1.41621	0.721292		0.685506	1.03155
1.28762	1.41543		1.73726	1.72823		1.30172	1.09906
1.06555	1.41997		1.0344	0.736697		2.43114	2.31737
0.481645	0.662953		1.44704	0.897546		1.17324	1.74841
0.540474	0.833147		1.35329	1.13529		1.32135	1.35476
0.721574	1.0123		1.22345	1.28535		0.753072	0.834727
0.959061	1.01385		1.25552	1.37573		0.769769	1.15581
0.441355	1.10193		0.847819	0.797257		0.719303	0.816041
2.03617	0.861478		0.546196	0.438388		1.24581	0.812423
0.869393	0.458349		0.616505	0.621877		0.579104	1.71971
0.539072	0.918244		1.17657	1.08739		0.919151	1.02075
0.783931	0.809246		1.02021	0.655306		0.962938	0.599788
0.401428	0.918244		0.986906	0.745741		0.753504	1.45533
0.383567	0.52552		0.358676	0.563999		1.88583	1.64784
0.363579	0.606187		1.01157	0.773744		1.03471	0.818916
0.541174	1.087		0.605716	0.734888		0.947939	1.25851
0.455712	0.528508		0.73678	0.414876		1.39436	1.95098
0.466225	1.5439		0.917809	0.506183		0.546977	0.804542
0.51947	0.909281		0.358378	1.72374		0.893674	1.27938
0.776559	0.745062		1.46309	1.03675		0.47063	0.651534
0.973418	0.754025		1.22622	0.48267		1.21745	1.6134
0.860982	0.782357		1.90471	0.60379		0.556563	0.809548
0.698806	0.837577		2.11228	1.42456		0.606223	0.542342
0.983931	1.28851		1.30487	1.91172		0.743485	1.19531
1.25784	0.879404		1.19754	1.17777		0.542399	0.810985
0.5608	0.742075		1.45845	1.04941		0.619149	0.487771
0.7419	0.710756		1.14851	1.52217		2.51834	2.01854
0.520872	0.536029		1.48035	1.44533		1.44315	1.59972
1.21932	1.19445		1.54019	1.18588		1.3785	1.01643
0.606673	1.51547		1.30302	0.736697		1.38975	0.810291
1.68554	0.957084		1.08096	0.698715		0.528207	0.382147
0.79094	0.982427		1.9593	1.36038		0.824841	0.654409
1.7013	1.13624		0.955135	1.2049		0.93081	1.53295
0.861345	0.910826		1.29717	1.27718		0.972553	1.01787
1.33702	1.19146		1.46924	1.46161		0.652946	0.957549
1.23263	1.50208		1.6731	0.829751		0.980873	0.596913
0.677078	1.15715		1.43532	0.73308		1.51786	1.04017
0.722275	1.63199		1.68759	1.46522		0.907866	1.0653
1.51952	1.33034		1.66972	1.07293		1.21495	0.836164
1.14611	1.07051		1.0896	0.898481		0.900784	0.982679
2.19486	1.10039		1.23271	0.67701		0.661727	0.790168
0.725417	0.946575		2.55638	1.33506		1.02596	0.894304
0.700571	1.20939		1.21235	0.415811		1.25543	0.945307
1.32547	1.78869		1.33879	0.773744		1.187	1.10337
1.08411	0.785344		1.16115	1.08016		0.641258	1.07893
1.26171	1.69617		1.23486	0.676137		1.22413	0.686031
0.913526	1.49754		1.91891	1.33955		0.840703	1.5444
1.53141	1.68721		0.956071	0.467327		0.483556	0.867043
1.30968	0.743517		0.915958	0.910206		1.37308	1.96466
0.446262	0.806258		1.05568	0.991597		0.503161	0.721223
0.474975	0.649457		1.20403	1.38926		0.642525	2.03936
0.901973	1.01828		1.01312	1.23652		0.908701	2.55657
0.409839	0.3374		1.11397	1.32602		0.815657	1.46039
0.670794	1.02879		1.14204	1.02047		0.918719	0.948925
0.945043	1.21536		1.04704	0.842412		0.854061	1.42663
0.472872	0.845098		0.482653	1.6189		0.642093	1.30594
0.920874	0.501722		1.60032	1.68938		0.762255	0.994872
0.916693	1.2915		1.77889	0.937337		1.23956	1.06456
0.526818	1.01529		1.65276	1.13349		1.28378	1.36844
0.375494	1.23185		0.905169	1.02684		1.04723	0.882111
0.651169	1.58563		1.02359	1.05665		0.737238	1.68165
0.956258	0.689842		0.619591	1.48331		1.08103	0.928802
1.79203	1.55132		0.889145	0.92742		0.657121	0.699662
0.933853	0.888367		1.02976	0.625494		1.70475	1.52001
1.04452	0.79884		0.832689	0.590256		0.860308	1.49627
0.859943	0.946575		1.31104	0.451922		1.3468	1.44745
0.429802	0.746505		0.779042	0.481797		1.38768	1.41439
1.16363	1.51846		0.913809	0.364295		0.816492	1.23625
0.559736	0.582286		1.11644	1.24195		1.29173	1.96466
1.29042	1.07649		1.06862	0.353443		1.23415	2.12124
0.847327	1.20795		0.660597	0.49084		1.57377	0.996309
1.57451	1.13624		0.977032	0.821643		1.46195	0.999928
1.34333	1.01684		1.18954	0.761956		0.590361	0.876362
0.476739	1.00035		0.823752	0.290138		0.454365	1.06962
1.20426	1.3871		1.24627	0.555018		0.875738	1.07824
1.79447	1.05856		1.13678	0.411258		1.42856	0.941044
0.801429	1.17055		1.22128	0.568552		1.16779	1.11269
0.887617	0.870441		1.54883	0.773744		1.86456	2.61476
0.847665	0.80327		0.840712	0.348016		1.66721	1.44671
0.839617	0.683867		0.858608	0.743932		0.985882	0.882855
0.627362	1.17951		0.665236	0.470945		0.929573	1.28656
0.537331	1.5677		0.606333	0.475435		0.849455	0.680976
0.855375	0.843552		0.962221	0.598364		0.717633	1.16587
0.705115	1.28109		1.24782	0.741188		0.753504	1.32319
1.41373	1.24823		1.58058	1.21301		0.758513	1.15938
1.21758	0.830159		0.381509	0.411258		1.27921	1.51065
1.07466	0.609175		0.587521	0.5514		0.934985	1.65359
0.67848	1.21093		0.645808	0.941827		1.39393	1.14862
0.947847	0.943588		0.350355	0.248601		1.22287	1.05162
0.763967	0.37624		0.844734	0.67701		1.04847	1.56452
0.447663	0.931637		0.90302	0.621877		0.832355	0.961862
0.787435	0.851073		0.46231	0.414002		0.832786	1.26788
0.685852	0.464325		1.69685	0.841539		0.655883	1.25781
2.45091	0.876417		1.81127	1.6252		1.30255	1.34326
1.04803	1.51403		0.649191	0.632729		1.83326	1.33539
0.720172	0.391178		1.60588	0.912015		1.19324	0.872049
1.14751	1.33786		1.43594	0.526079		0.815254	1.10263
1.10304	0.948121		1.36131	1.72555		0.894105	0.706849
1.96963	1.49157		2.06817	1.13529		0.476877	0.467647
1.73284	0.800283		0.895912	1.68214		1.58085	1.08181
0.542576	0.52109		1.19015	0.717675		1.15945	1.11918
1.5717	0.939158		1.46833	1.06656		0.72388	0.956806
0.664486	1.21691		0.620825	0.567616		0.98381	1.03368
0.489331	1.10935		0.91998	0.828878		1.63926	1.16875
0.78323	0.745062		0.925215	1.34679		1.43524	2.26637
1.15031	0.88095		1.40972	2.23261		0.756411	0.726972
1.05784	0.937612		1.68915	1.94877		1.2062	0.548092
0.688994	0.571881		0.641786	0.211492		0.446016	0.550966
0.505452	0.583831		1.0347	0.69148		1.30172	0.908678
1.08237	1.22433		2.00062	1.12625		0.882849	0.647222
0.947508	0.703235		0.689283	0.819834		0.77354	0.820353
0.804934	0.921232		0.707179	0.707758		0.808144	0.389334
0.420328	1.7857		0.574562	0.701397		0.887023	0.594088
1.91218	1.22288		0.44935	0.90029		0.962103	0.459023
0.443458	0.428473		0.382126	0.757466		0.402632	0.524399
0.678142	0.453919		1.36995	0.96534		0.879078	0.655103
0.635749	1.02281		1.99571	0.988853		0.519858	1.06099
2.15911	1.33188		1.10748	1.31155		0.946673	0.57109
0.687954	0.888367		1.2145	0.636346		0.830282	0.844739
1.38396	0.788332		1.64597	1.35583		0.962103	0.626405
1.5458	1.39905		1.05692	0.865925		1.32633	1.5674
1.42495	0.680879		1.24688	1.45886		0.989222	1.52358
0.971678	1.00489		1.20032	1.12893		0.786869	1.27576
0.917732	1.24967		0.756209	1.10548		0.746422	1.27432
0.553452	0.836135		0.6899	0.98798		1.12648	1.45176
1.38396	1.40647		0.384573	0.526079		2.03939	1.59684
1.59868	1.95445		0.473396	0.680628		0.851556	0.692475
1.42495	0.860036		0.73678	0.456475		0.363826	1.05812
2.29014	2.10826		0.831774	0.354316		0.911206	1.42807
1.20322	0.982427		0.900232	1.22386		0.385503	0.543085
0.760801	0.558385		1.07326	0.472754		0.558233	0.767913
1.40602	1.45572		1.71011	1.75355		0.574527	0.739909
1.51215	1.75881		1.36501	1.68395		1.17992	0.466904
1.39868	1.00334		1.60618	1.74002		0.493575	0.498526
1.67713	1.60953		1.39214	1.78517		1.09228	0.498526
0.95662	1.44531		1.64103	0.865925		0.410549	0.439643
1.24979	1.08246		0.993694	1.14521		0.57493	0.962555
0.935255	1.4722		0.548345	2.1214		0.549884	0.280886
1.78012	1.33034		1.42976	1.59807		0.503161	0.229883
0.843484	0.834589		0.810494	0.846965		1.48907	0.796611
0.731387	0.827172		1.5078	0.821643		0.721779	0.539467
1.04873	1.43789		1.03347	0.674329		0.606626	0.375704
1.03788	0.886925		0.528299	0.843347		0.478547	0.387897
0.857139	0.876417		0.948963	1.13617		1.31467	0.739909
0.867653	0.474833		0.725055	0.982554		0.681734	0.810985
0.925442	0.943588		0.50487	0.511609		0.611232	0.742784
0.524715	0.955538		1.2617	0.902099		0.955856	0.793043
0.718432	0.662953		1.32275	0.773744		2.04563	1.17231
0.823496	0.874974		1.15066	1.29621		1.64093	1.49845
1.71568	0.937612		1.25367	1.03588		1.36931	0.904366
0.586709	0.701793		1.18275	1.31966		0.951682	1.03586
0.700909	0.870441		1.18768	0.909333		0.675487	0.40802
1.80184	1.57821		0.742036	0.444688		0.605791	0.346262
1.78118	2.09034		1.47109	1.39562		0.432659	0.531586
1.76997	1.24823		1.01744	1.83763		0.676725	1.20176
0.994445	0.906293		1.32954	0.935528		1.04139	1.13643
1.80395	1.27955		0.937238	0.940019		0.868225	0.813166
1.16607	1.02879		0.875249	0.957232		0.861978	0.560285
1.14891	1.14819		0.811409	1.03588		0.584517	0.937426
1.91428	1.07649		0.909808	0.433898		1.24207	0.74779
0.73419	0.837577		0.343865	0.416684		1.48864	0.303834
1.19621	0.845098		0.693922	0.874968		1.58376	1.94667
1.79413	1.19301		0.488824	0.622812		0.704679	0.698918
1.6155	0.867454		0.992141	0.874968		0.974223	1.19601
1.59902	1.08102		1.14451	1.0458		1.36597	1.20538
1.52757	1.17209		0.714585	1.2528		1.00592	0.71691
1.20672	0.900318		1.05104	0.542357		1.17908	0.709724
2.43725	1.74243		1.04025	0.924676		1.14318	0.735597
1.53282	1.01684		1.01683	0.448305		1.2041	1.52646
1.41617	1.02127		1.06309	0.957232		0.734302	0.889298
1.17414	0.52109		0.677877	0.908398		0.38844	0.839039
1.80465	1.00489		0.664002	1.00962		0.698835	1.14719
1.41828	1.30046		0.956688	0.73757		0.289552	0.799486
0.79094	0.659965		2.57674	1.89819		0.836932	0.806673
1.25436	0.350896		0.424367	1.19224		0.680497	0.953931
1.02562	1.16313		0.361144	0.661668		0.666304	0.966868
1.14226	0.55993		1.61852	0.811664		0.822336	0.808854
1.67609	0.425485		0.433305	0.411258		0.879078	0.696044
2.47017	1.08401		1.56147	1.83763		0.945435	0.931676
1.86314	0.900318		1.15468	0.725845		1.31174	1.6184
0.578323	0.591249		0.970244	0.435707		1.67012	1.16082
0.663084	0.661408		1.02483	1.08827		0.783962	1.88779
0.637151	0.867454		0.709329	0.827069		0.747257	1.12706
1.16153	0.651002		0.71982	0.629985		1.25793	0.805979
0.633308	0.443411		0.730311	0.595682		0.770201	0.471216
1.46908	0.949563		0.446881	0.533313		0.757246	1.00637
1.58886	0.736099		0.961604	0.840603		0.979203	0.621349
1.22072	0.84654		0.867865	0.808109		0.576168	0.440337
1.17729	0.588261		0.509487	0.357933		1.6622	1.52576
1.30444	0.760001		1.72739	0.921059		2.13617	0.726972
1.25576	1.09143		0.450882	0.492649		1.32593	0.686725
0.689356	0.816766		0.90702	0.475435		1.63218	1.19963
0.914227	0.857048		0.96686	1.20939		1.17992	1.2772
0.37866	0.925765		1.05536	1.02322		0.900352	0.937426
0.560437	0.685309		1.0899	0.857817		1.15945	0.985554
0.893563	0.877962		1.1371	0.890311		1.24164	1.10838
0.985696	0.522533		0.46631	0.989789		1.10898	1.191
0.800728	1.34074		0.452733	0.725845		1.48657	1.39789
0.78323	0.597224		0.388276	0.843347		1.23165	1.38282
0.89146	0.380773		0.257212	1.03769		1.33428	1.35333
0.881309	0.760001		0.255361	0.770127		1.11857	0.840476
1.29079	1.2676		0.910723	0.38051		0.632938	0.8663
0.607737	0.762988		0.424686	0.714057		1.72105	1.24057
0.629102	0.546434		0.559134	0.773744		1.6935	0.906547
0.569912	0.534483		1.10627	0.700523		1.24708	2.00561
1.10968	1.61252		0.7451	0.427536		1.12732	1.17088
1.35909	1.32137		0.940324	0.813473		1.1874	0.946744
0.38915	0.722603		0.980735	0.704141		0.632104	0.350525
0.694601	0.583831		0.735248	0.345272		0.695092	1.12062
0.572353	0.648015		0.855821	0.362486		0.5937	1.39214
0.880946	0.819754		0.857672	1.17958		1.15904	0.993435
0.867291	0.830159		1.02268	0.75653		2.48247	1.2765
1.62355	1.78869		0.656299	0.518844		1.18406	0.837602
1.61233	0.88538		0.320733	0.49084		0.658387	1.24845
1.08411	0.876417		1.21543	0.56219		0.617479	0.76717
0.708619	1.56925		0.934472	0.729462		1.44983	1.10406
0.361137	0.491214		0.767317	0.658924		0.669643	0.540211
1.11529	0.612163		0.72382	0.310034		0.798154	0.672351
0.652232	1.63941		0.62174	0.774617		1.15778	1.10912
1.17555	1.08246		0.511339	0.473627		0.932077	0.892173
1.73809	1.24823		1.14327	0.489032		0.818162	0.645041
0.82526	0.464325		0.693603	0.923803		1.17447	1.3677
0.41228	1.72749		0.603545	0.925611		1.18533	1.15938
0.398962	0.482251		1.03317	1.35676		0.341717	0.525837
0.698468	0.942145		0.754676	0.799939		0.53739	1.03586
1.11633	0.583831		0.80494	0.617386		0.607893	1.75272
0.436449	1.15118		1.27866	1.56826		0.750164	1.57602
0.600728	1.05856		0.796002	0.808109		0.786869	2.24337
0.920173	0.703235		0.514105	0.567616		1.77402	1.22907
0.893563	1.49754		0.766083	0.558635		0.995066	1.04949
0.691096	0.552409		1.12044	1.00962		0.830282	1.14287
0.631906	0.441969		1.10471	0.711376		0.673818	1.27794
0.45257	0.539016		0.827156	0.922867		1.18573	0.823922
0.97482	0.412092		0.472779	0.432089		0.878675	0.924489
2.09221	0.806258		0.896231	1.06388		0.808576	1.46108
0.491797	0.476275		0.554516	1.43716		0.435998	0.469085
0.559398	0.561372		0.316733	0.526952		0.89661	0.868481
0.947508	0.6032		0.812026	0.874968		1.08103	0.795917
1.21791	0.976452		0.468779	1.54387		0.91371	0.93242
1.13105	0.652445		0.445966	2.32841		0.757678	0.56534
1.12334	0.688297		0.464161	0.651689		0.882849	0.890736
1.17414	1.30499		1.1667	0.771		0.659222	0.873487
1.09393	0.851073		0.895295	0.92742		0.441842	0.545911
0.968874	1.2676		1.02915	1.98313		0.432227	1.28582
1.302	1.14222		0.611568	0.264817		0.448924	0.379273
0.584268	0.491214		0.625145	0.814408		0.465189	0.984116
0.436449	0.382215		0.896231	1.1371		0.543637	0.71473
0.922638	1.68865		0.848734	0.57036		0.535721	0.771482
0.382503	0.416522		0.486973	0.640837		0.466859	0.618474
0.848729	1.11986		0.566241	0.898481		1.12692	1.43526
0.597924	0.677891		1.24227	0.639964		0.982975	1.01643
0.903714	0.992936		0.692985	0.530569		1.02469	1.07175
0.644522	0.613708		1.33232	1.06114		1.02178	1.35982
1.10197	1.39009		0.95422	1.61435		1.82702	1.53796
0.974119	0.782357		1.12384	1.40554		0.613737	1.09544
1.77731	0.99139		0.89006	0.539613		0.669643	0.829671
1.42565	1.17055		0.742036	0.395915		1.14528	1.20032
1.17484	1.0019		1.1371	0.8126		2.00893	2.60182
0.391615	0.651002		1.06771	0.814408		0.790209	1.24701
0.74364	0.392724		0.659682	0.252156		0.713459	2.17368
0.838215	1.00932		0.777808	0.692353		0.48773	1.27219
0.902312	1.0496		1.03161	1.00781		0.459777	0.489902
0.609477	1.17652		0.401853	0.545974		0.546574	0.810985
0.715628	0.948121		1.00787	0.689671		0.459777	0.949619
0.586709	0.262812		0.967477	0.471818		0.899949	0.637904
0.833309	1.50053		0.455819	0.636346		1.30923	0.672351
0.325754	0.739087		0.858289	0.728527		0.906628	1.14501
0.960826	0.745062		1.17379	0.719483		1.15444	1.24632
1.006	1.06309		0.891912	0.850582		0.888693	0.974798
1.3251	1.61705		0.823134	0.959914		0.509005	0.420957
0.595821	1.0019		1.05322	0.604725		0.932912	0.841914
0.561839	1.30942		0.552665	0.365168		0.685909	0.772919
1.07991	1.57666		0.420367	0.872286		0.727623	0.929545
0.573755	0.779369		0.609419	0.872286		0.563242	0.720479
1.24348	0.937612		0.334927	0.978001		0.770604	0.782287
0.50405	0.843552		0.266767	0.626367		0.817759	0.895048
0.51947	0.961514		1.09731	1.23022		0.839868	0.686031
0.753453	0.757013		1.46092	0.96085		0.680065	0.634285
1.69535	1.08102		0.841946	0.700523		0.831117	0.777975
1.22562	0.864466		0.951751	0.85869		1.19742	0.920921
1.62389	1.81712		0.594927	0.451049		0.85907	0.731978
1.59027	1.30046		0.569625	0.446496		0.895343	0.568909
1.37731	1.16457		0.417579	0.449241		0.908298	0.599788
2.12129	1.60211		1.45445	2.04731		0.543234	0.497783
0.812305	1.30798		1.92878	2.14585		2.3089	1.00855
0.838215	0.831602		2.13139	1.30525		0.995901	1.32676
1.26906	1.01684		0.822836	1.15787		0.987984	1.05737
0.960463	2.28289		1.35329	0.682437		0.672551	0.896485
0.917732	0.725591		1.60556	1.26995		0.793548	1.29226
1.69956	1.14067		0.498379	0.644454		0.883684	0.830415
0.838916	0.907839		0.634699	0.555891		0.590361	0.601225
0.623858	0.588261		0.606333	0.316333		0.752237	0.961862
0.904076	0.828614		0.894997	1.12082		0.572426	0.971923
0.307892	0.683867		1.23486	0.935528		0.493575	0.509282
0.788475	0.69726		0.400321	1.08559		1.11105	1.3562
0.573054	1.11986		0.741419	0.568552		1.3956	1.49845
0.675701	0.989948		1.04396	0.650816		0.647102	1.38426
0.596184	1.52742		0.787363	0.347081		0.94627	0.606975
1.27783	0.780914		1.1704	0.848773		0.529042	1.26282
1.69886	0.767418		1.23209	0.99877		1.65052	1.82816
1.11599	0.61958		0.357143	0.302799		0.666304	1.23843
1.04452	1.00334		1.3465	0.916568		0.652111	0.568909
0.368847	0.679334		0.487909	0.552273		1.07308	1.35982
1.62495	1.28707		0.670471	0.781852		0.857803	1.04949
0.664124	0.813779		0.853054	0.923803		1.20994	0.8663
1.04278	0.640494		0.950517	1.7689		0.874501	0.793043
0.829804	0.588261		0.222355	0.859626		1.02719	1.015
0.601791	0.731566		0.977968	1.13255		0.763522	0.626405
1.04733	0.964501		0.811111	0.826134		0.89828	1.30232
1.33141	1.58563		1.59139	0.978001		0.803163	0.612725
1.20252	0.97501		1.37612	0.826134		0.891601	1.03799
0.957659	0.346363		0.614654	1.78249		0.900352	0.780106
0.62874	0.324007		0.965626	0.997897		1.35305	1.4022
0.899871	0.857048		1.07511	1.42637		0.902022	1.06099
0.34782	0.795853		0.695454	1.0042		0.957526	1.12563
0.664124	0.459895		1.31875	1.59445		0.517354	0.67597
0.728921	0.409104		0.457053	1.30344		0.327092	0.436768
2.32796	1.00932		0.877718	0.606534		0.605791	0.750664
1.50724	1.69617		1.35546	1.08827		0.527775	0.770044
0.514564	1.70812		0.513488	1.10006		0.798557	0.907984
0.837514	0.604745		0.668003	0.791831		0.903289	0.865606
1.67923	1.5573		1.18551	1.32689		1.36223	1.10624
1.31425	0.934625		1.27095	1.85752		1.05014	1.15437
1.77311	0.904851		0.945261	0.890311		0.418898	1.34688
1.0533	0.677891		0.753123	1.92712		1.50657	1.16012
1.21371	0.904851		0.609717	1.34049		1.71604	1.21831
1.1251	0.75248		0.850905	0.438388		0.630434	0.826103
1.34403	0.733112		0.369465	0.874968		1.03972	0.844739
0.868354	0.80327		1.30579	1.41552		1.37893	1.18813
0.814747	1.10791		0.759613	0.542357		1.53453	0.863425
0.611241	0.762988		0.453968	1.00781		0.804833	0.522962
0.775157	0.467312		0.687751	1.96324		1.17073	0.652971
0.988499	1.05557		0.71982	1.09189		1.81991	1.08255
1.5013	1.31993		0.284046	0.864116		0.947508	0.635029
1.16153	1.45128		1.75761	1.10367		0.646699	0.614905
0.647664	0.882392		1.11397	0.58483		0.495244	0.999184
1.27643	0.637506		0.632231	0.420302		0.927068	0.854801
0.610879	0.845098		1.20679	1.06569		0.473135	0.764295
0.494238	0.70478		0.593693	1.18862		1.25333	1.63634
1.03263	1.10338		1.95315	1.86744		0.634176	1.11056
1.37451	1.14963		0.986906	1.16062		0.902022	0.575402
1.31425	1.16014		1.45104	1.62788		1.08353	1.02149
0.767109	0.352339		0.730311	1.17509		0.69633	0.870612
0.463059	0.561372		1.07418	0.977128		0.505263	0.742784
0.846263	1.44088		1.36716	1.83582		1.47655	0.727666
0.468328	1.61252		1.69594	1.35221		1.39269	0.789474
2.33811	1.79919		1.05692	0.65805		1.40187	1.17519
0.879206	0.52552		0.839797	0.820708		0.937921	1.02868
1.82391	1.27512		1.41342	1.03675		1.51993	0.906547
1.35314	1.49157		0.789831	1.56732		1.3447	0.79448
1.61444	1.83051		0.57918	0.944572		0.957526	0.709724
1.17869	0.995923		0.889762	1.07112		0.580342	0.415207
0.738734	0.749492		1.30734	1.56826		1.4486	0.961862
1.08588	1.11831		1.02421	2.32391		1.2408	0.784418
1.0715	1.44531		0.424367	0.884885		0.705945	0.589776
1.33315	1.19445		0.842563	0.721292		0.837364	0.677407
1.88417	2.03058		0.753442	1.90449		0.594535	0.646478
1.83546	2.32626		1.08437	0.771		0.551151	0.650097
0.783931	0.612163		0.575179	0.845156		0.695927	0.800923
1.08622	0.701793		2.16472	1.54474		0.824006	0.890736
0.781127	0.731566		0.843797	0.955424		1.04473	0.823228
1.05049	0.937612		1.25182	0.975319		1.08854	0.595476
0.89146	0.656978		1.14542	1.34772		0.770201	0.6896
0.647326	1.26914		0.977351	1.03856		0.809813	0.788036
2.11745	2.77266		0.791065	1.185		0.749329	1.07968
1.41057	0.579298		0.993992	0.976192		0.795218	1.38282
2.00919	1.39905		0.86878	1.36943		1.38474	1.02075
0.488993	0.6032		0.875249	0.735762		0.81108	0.704668
0.993043	0.573323		1.41127	1.04399		0.77187	1.29301
1.10654	1.47519		0.792597	0.923803		0.749329	0.506407
0.62874	1.0496		0.793832	1.05665		1.34179	1.25707
0.449404	0.879404		1.10656	0.639964		1.63759	1.26931
1.98923	1.98577		1.1337	1.21481		1.23081	1.32607
1.08481	1.52896		0.545259	0.475435		0.623755	0.642216
1.80428	0.80327		1.03408	1.01505		0.738908	0.973361
1.07396	0.88538		0.804323	0.565807		0.577435	0.661596
0.660982	0.788332		0.942792	0.992471		0.323753	0.688163
0.714927	0.776381		1.43964	1.70565		0.954186	1.03368
0.922638	1.00633		0.680345	1.19405		1.41186	1.58965
0.78323	1.39905		0.350653	0.496266		1.98014	0.657284
1.23894	0.577856		1.6065	1.48693		1.06851	0.892173
0.875339	1.43037		0.739568	0.926485		0.810648	0.726229
0.512099	0.858491		0.876186	0.922867		0.95125	1.18813
1.22669	1.29448		2.15822	2.64748		1.2233	0.75567
0.736293	1.29902		0.902083	0.822516		0.922059	0.583283
1.29393	1.35722		1.12261	2.50198		0.511941	1.88923
1.13175	1.11389		1.25367	1.65501		1.00468	0.902235
0.618589	0.694272		1.16423	1.18681		0.900784	0.871356
0.820354	1.13768		1.26787	2.14492		0.847382	1.35764
0.483047	0.486784		1.19877	0.862307		0.630434	0.624224
0.956258	0.812233		1.17102	1.36219		1.24915	1.09257
0.917031	0.645027		0.475567	1.04941		1.30255	0.86055
2.34756	2.85477		0.925832	1.56283		1.14151	0.645041
0.442757	0.52109		1.06956	1.41009		0.680497	1.46182
0.623157	1.08844		0.871249	1.26184		0.758081	0.707543
1.4379	1.26615		1.55036	1.8584		1.04763	0.798792
1.34997	1.53195		1.49825	1.71832		0.561572	0.982679
1.25576	1.00035		1.70087	1.66406		0.387605	0.515032
0.534528	1.35722		1.15004	0.949998		0.617076	0.574658
0.924741	1.61107		0.9539	0.758339		0.489803	0.684594
0.549247	0.860036		0.63687	1.00781		0.527372	0.356274
1.00039	0.464325		0.922448	0.500757		1.67139	0.530149
0.891822	1.21835		1.10871	1.07561		0.635414	0.655103
0.563604	0.671916		0.789831	1.27537		0.723449	0.349831
1.72723	1.18404		1.12755	1.25099		0.402632	0.29526
1.36924	0.888367		1.28821	1.30251		0.79398	0.594782
1.20042	0.661408		1.30611	0.615577		0.676322	0.589032
1.12791	0.412092		1.46956	1.27176		0.393852	0.283761
1.98609	1.37361		1.04396	1.93972		0.611232	0.451093
0.631205	0.606187		1.08128	1.15606		0.514849	0.976929
1.04208	1.04517		1.10348	1.20215		1.19952	0.690344
0.406672	0.544992		2.00156	2.39352		1.2404	0.883549
0.503349	0.500177		1.11303	1.27631		0.919151	0.91299
0.561138	0.770406		1.27834	2.14311		0.574527	0.545217
1.73565	1.03167		1.13061	0.818026		0.822768	0.401527
0.612643	0.863024		1.54295	1.75717		0.399293	0.617037
1.63687	1.05557		0.419749	0.948189		0.619984	0.505713
1.00145	0.988403		1.32645	1.60443		0.351706	0.494958
1.84211	0.764431		0.878654	1.04399		0.569086	0.595476
0.958022	0.858491		1.15715	1.16785		0.678827	0.482715
0.959424	0.646469		1.11582	1.26727		0.723449	0.997747
1.57839	1.37857		1.35546	0.830687		0.616644	0.403708
1.49091	1.35527		0.914745	0.848773		0.592865	0.87998
1.01211	1.25094		0.822836	0.857817		1.62216	1.09257
1.05848	1.37857		1.23024	0.712249		0.849052	0.65654
0.533977	0.938743		0.771019	0.540548		1.34386	0.477709
0.784106	1.44279		0.577648	0.800874		0.703441	0.719785
2.56134	1.51934		0.430836	0.704141		0.563242	0.749921
1.1333	0.951879		0.354058	0.897546		0.273287	0.562465
1.63461	1.76445		0.509807	0.558635		1.56332	0.958987
1.19019	1.12768		0.587819	0.628176		1.64677	0.72841
0.659732	1.32094		0.450265	0.299182		1.59628	1.06743
1.15895	1.28889		0.366081	1.43535		1.28338	0.78085
0.951312	1.77029		1.24318	0.512482		1.46028	1.03299
1.16877	1.86219		0.815431	0.348016		1.10731	0.72841
1.35321	1.31732		1.2401	1.2528		1.11105	0.674532
0.574021	0.542702		1.35946	0.863243		1.53536	0.525093
1.26924	1.63898		1.23148	1.90904		0.871564	0.489208
1.18741	1.55875		0.895912	0.841539		1.11399	0.38071
1.53062	1.56237		1.37797	0.976192		0.821933	0.407277
2.08706	2.23709		0.450584	0.808109		0.852794	0.597657
1.22357	2.674		1.19139	0.79813		0.826942	0.727666
1.60227	1.68347		0.767934	1.0955		0.9446	0.933857
1.30087	1.32094		1.0273	0.905716		0.949177	0.966868
2.45243	1.85927		0.58135	1.03494		1.31718	0.906547
1.96938	1.77466		1.07573	1.0458		1.0489	0.449655
1.91668	1.4435		0.919661	1.28261		1.30131	0.548785
1.2552	1.57551		1.16547	1.36668		0.959196	0.553841
1.09045	1.10433		0.542493	0.324504		0.919986	0.539467
0.7588	1.10579		1.08067	1.07199		2.08027	0.959681
0.822744	0.647739		1.34064	0.550465		1.56499	1.20894
0.648509	0.721371		1.13463	0.686927		0.975893	0.451093
0.943604	0.714828		0.358378	0.43658		0.969214	0.608412
0.40856	0.795053		0.878952	1.01418		0.864482	0.599788
1.08306	1.70098		0.917192	0.790895		1.5558	1.03943
0.845942	1.22175		0.285898	0.854199		0.432659	0.378579
0.459149	0.662284		0.26183	0.792704		0.846115	0.925927
1.37851	1.49966		0.473396	0.605599		1.37976	1.25638
0.837506	0.667418		0.238699	0.518844		0.657121	0.582589
0.476359	0.534649		0.415727	0.525143		0.772274	0.923052
0.829071	1.32608		0.643339	1.37392		0.526105	0.767913
0.72438	0.781917		0.614356	1.39107		1.34303	0.833289
0.615834	0.784836		0.448116	1.52666		1.84121	1.04156
0.563137	1.08243		0.91566	0.505248		1.45778	1.05812
1.47266	1.37495		0.542791	0.399533		2.31432	1.50633
0.535383	0.216618		0.62391	0.671584		0.737641	0.453273
0.897912	1.06638		0.386425	0.359742		1.23122	1.32032
1.10344	1.64703		1.34928	0.56219		1.30382	1.44026
1.35146	2.22104		0.57486	0.695097		1.57711	0.598351
1.5942	2.41143		0.810175	0.440197		1.07475	1.05812
1.07884	1.77975		0.309646	1.03494		0.940829	1.29732
0.997683	0.760024		1.12599	0.909333		1.19535	1.12924
1.42241	1.28889		0.233464	0.742996		1.99848	1.78003
1.56644	2.12913		0.808643	1.12712		1.99931	1.29876
1.06795	1.41944		1.14204	0.809918		1.14528	0.945307
0.959747	1.13936		0.71118	0.865052		1.6768	1.68021
1.57066	1.12476		0.861992	0.700523		1.7277	1.29588
0.447562	0.846842		0.611568	0.465519		0.840271	1.18238
0.743359	1.08903		0.412344	1.04941		1.45568	1.02436
1.18564	1.59232		0.744505	0.517035		0.804401	1.13787
0.808685	0.557247		0.307178	1.22386		1.14027	1.77072
0.604248	0.805974		0.243018	0.539613		1.37308	0.997747
0.627081	1.57481		0.43239	0.897546		1.41771	0.738471
0.618282	0.496751		0.806791	0.712249		1.42482	0.606281
0.77601	0.768076		0.887294	0.606534		0.697597	0.684594
1.12591	1.02556		0.808026	0.990662		0.675056	0.941044
0.796057	1.18601		0.989055	1.5294		1.57878	0.754233
2.44821	1.78196		1.1963	1.98588		1.48029	0.953931
0.65343	0.514215		0.903637	1.53483		0.966278	0.803798
1.0265	0.632388		0.849054	0.851455		2.28219	1.60765
0.715944	0.845382		0.925534	0.438388		1.93716	0.877799
1.66798	1.85564		1.0862	1.26995		1.3443	0.957549
2.1113	1.12476		1.72183	0.970766		1.10815	1.0035
0.706103	0.96572		1.28821	0.999705		1.42899	1.15581
0.492163	0.380742		1.59077	1.36668		0.897013	0.914428
0.890907	0.7564		1.50163	1.0196		1.68348	0.790168
0.898615	1.32678		1.73571	1.82677		1.24164	0.720479
1.4435	1.5967		1.46894	0.720419		0.72555	0.691037
0.601775	0.792134		1.65923	1.5556		0.793145	0.813166
0.551551	0.714828		0.83486	1.00962		1.16779	0.724791
1.31035	1.02556		1.2105	1.37841		0.599141	0.727666
1.16036	1.15612		0.710563	1.82041		1.28879	2.36406
0.821702	1.24218		1.43162	2.09253		1.32176	1.38064
1.8668	1.2305		1.35329	0.728527		0.808979	1.02793
1.70662	1.38954		1.23609	1.69748		2.56506	1.63421
1.06092	0.911767		1.34341	0.925611		1.16779	0.431713
0.580347	0.792889		2.36485	2.22812		1.76694	1.09331
0.691365	0.648444		1.93957	2.10244		0.991323	1.43238
0.929884	1.16704		1.82885	1.77251		1.38725	0.974055
1.44491	1.43403		1.32151	1.42456		0.52861	0.566034
1.06655	1.62368		0.928918	1.15245		0.536555	0.851926
1.29595	1.81694		1.84766	1.34591		1.11857	1.02506
1.71928	1.37419		1.10133	0.75204		0.568683	0.534461
1.58436	0.897926		1.39955	1.43629		0.852794	1.39214
2.1106	1.49674		0.762997	0.458284		0.613305	1.81235
2.35688	1.78996		1.01374	1.00875		0.567416	1.52358
0.947458	0.970098		1.62622	1.48237		1.10564	0.987735
1.80533	1.88624		1.70302	1.44714		1.07559	1.24126
1.21165	1.44642		0.882038	1.18768		1.35973	1.9431
1.29067	0.808189		1.14883	1.56464		0.606626	0.963299
1.64515	1.05183		0.720756	2.06084		1.19241	1.00424
1.41187	0.871654		0.850288	0.944572		0.606223	1.22332
0.670277	1.32824		0.523064	0.683372		0.964608	1.45608
0.555065	0.682718		0.486973	0.421237		0.656286	0.768607
1.05671	0.792889		0.730928	1.07923		0.478144	0.681719
0.732815	0.987613		0.982884	0.687863		0.607058	0.699662
1.45087	1.6966		0.805876	0.990662		0.347532	0.558153
0.855056	1.61346		0.870951	1.04399		0.904527	1.19169
0.609508	0.663039		1.43749	1.26633		1.33969	1.18238
2.08076	2.08318		1.12969	0.588447		1.22079	0.818172
0.903899	0.956258		1.5593	1.01056		2.7428	1.5394
1.58613	1.06713		1.38659	1.3441		0.829447	1.3052
0.573681	1.60616		0.998014	0.803556		0.655883	0.9518
0.659732	1.54345		1.63425	1.68395		0.572426	0.331888
0.856462	1.86073		1.42885	0.968958		1.61839	0.941738
1.06129	0.768781		1.27033	1.73821		1.20178	1.15938
0.856123	0.793593		1.05845	1.06207		0.369124	0.933777
1.37851	1.0613		0.849969	0.883076		0.36272	0.290956
1.76354	1.42598		1.43717	1.80058		1.06788	1.13164
1.15543	1.2152		1.51859	1.67129		0.80332	1.5417
1.58295	1.27062		0.875866	0.878586		0.772919	1.39752
0.994168	1.39609		0.807728	1.14702		1.00921	0.894365
1.17861	0.96426		0.748505	0.580277		0.727059	1.04658
2.24024	1.65503		0.493442	1.01598		0.669421	0.743945
1.22675	1.57335		0.57486	1.19673		0.537694	1.1755
0.755649	0.940958		1.02976	0.96534		0.610238	1.68402
1.24607	1.44058		1.23454	1.51855		0.602766	1.41636
0.95027	0.674715		0.68558	0.503439		0.949476	1.04571
0.933399	0.676175		1.299	1.01237		1.01083	2.4271
0.73633	0.824244		0.707796	0.66435		0.860406	2.01977
1.24677	1.0387		0.985352	0.690544		1.55489	1.06628
1.45016	1.60254		0.717351	0.616451		0.683297	1.6545
1.78741	2.75498		1.3502	0.861434		1.77146	1.31245
1.06163	1.27137		0.890379	0.848773		1.05349	1.20237
0.982945	0.706071		1.66076	1.32508		0.562206	0.798615
1.42171	1.66157		0.882974	0.469136		1.41676	2.52736
0.820296	0.755645		1.1846	1.47427		1.30472	0.852297
0.802359	0.719207		1.23609	1.08559		0.544098	0.861254
0.692771	1.05984		1.31104	1.45437		0.766515	0.851432
0.754946	1.46977		0.502082	0.651689		1.29247	1.55776
0.708212	0.604657		0.569625	0.628176		0.624629	0.819186
1.47581	1.53615		0.479887	0.627303		0.597429	0.811094
0.919364	0.622172		0.46231	0.375084		0.681162	0.855015
0.742656	1.10654		0.93694	0.748422		0.81024	0.839757
1.0553	0.957717		0.67726	0.989789		0.956432	1.29367
1.10836	0.913226		1.78753	1.57456		0.720103	1.29812
0.7827	1.13714		0.520276	0.769191		0.580904	0.807511
0.668871	1.04086		0.867546	1.33774		0.743033	1.33574
0.594043	1.10508		0.471545	0.305543		0.390471	0.438658
0.680118	1.14082		0.710265	0.807174		0.584106	1.18267
0.822744	2.90088		0.755911	1.30163		0.901996	1.05102
0.57087	1.94755		1.20988	1.29527		0.692903	1.12355
0.82941	1.38808		1.03811	0.687863		1.44127	1.3796
1.04686	1.09486		0.349738	0.908398		1.68187	2.02421
1.22428	0.96572		0.391064	0.469136		0.885986	0.64906
1.47862	1.69077		0.844734	0.940954		0.691836	0.814676
0.898615	0.667418		0.725055	0.531505		0.990551	1.14597
0.996277	1.11017		1.45722	1.26633		0.794266	1.32234
1.23763	1.11963		1.1334	0.498075		0.650761	1.30263
0.682227	1.25461		1.88561	1.42637		0.373909	0.529095
0.888798	1.30418		0.35127	0.248601		1.1879	0.752038
1.04546	1.12914		0.911957	2.55624		1.18897	0.934642
1.30824	0.730128		0.718905	0.620068		0.887605	0.926611
1.16106	1.24585		1.04919	1.20309		1.02202	1.44588
1.33811	1.49166		0.531087	1.00694		0.887053	1.1907
1.03176	0.767321		1.59386	1.60711		0.431546	0.563997
0.805171	0.732343		1.85598	2.49561		1.38209	2.17729
0.733154	1.00659		0.652596	1.32421		0.777188	1.44854
0.874036	0.862897		0.581648	1.34591		0.730776	0.815603
0.722634	1.03724		0.823134	0.912015		0.501956	2.39844
1.93462	1.69222		0.709031	0.902099		0.321645	0.499567
0.691705	0.839544		0.601077	1.62788		0.697725	0.884543
1.03072	1.10433		0.368847	0.359742		0.962284	1.29639
0.927436	0.425233		0.639636	0.559508		0.944691	1.04034
0.954487	0.69223		0.601396	1.18681		1.23965	1.21398
1.59316	1.72796		0.391979	0.637219		0.791579	0.701877
0.894421	0.895007		1.25276	0.985236		1.11271	0.829935
1.26117	1.50842		1.51706	1.52304		1.08389	1.25068
0.987502	1.03724		1.44734	1.8042		0.666771	0.852297
0.946755	0.846842		1.44828	1.38296		0.80067	1.16475
0.740548	0.746938		0.7963	1.05397		1.11322	2.2597
0.604587	1.00588		1.61575	1.0955		0.840126	2.23103
0.747916	1.03794		1.46647	1.49772		0.679028	1.36978
1.54994	1.26332		1.51459	1.55834		2.05847	1.43693
1.3908	1.63314		0.87742	0.902972		0.603282	0.888126
0.93798	0.730128		0.537854	0.921994		1.75762	1.43958
0.811158	0.895007		1.32769	1.23203		1.47594	0.675932
0.812903	0.633143		1.95098	2.08616		2.75936	1.84247
2.05545	1.30786		1.07511	0.906589		0.801186	0.765443
0.741953	0.690016		0.912894	0.903907		0.76173	0.576537
1.43295	0.904469		0.76638	0.732144		0.774502	1.00896
1.53975	1.19477		0.821602	0.804492		1.23432	2.20058
1.10344	1.2225		1.10503	1.51942		1.62637	1.59272
1.07639	0.708235		1.47911	1.10548		1.02949	1.99289
0.472505	0.566759		1.08713	0.763765		1.02522	1.23814
0.455998	0.593735		0.963157	1.18138		1.24499	1.06807
0.683972	0.809648		1.13957	0.597491		0.53394	0.8371
0.944646	0.744724		1.1667	1.24195		0.982564	1.1603
0.791136	0.563085		0.882974	0.635411		0.668906	0.881825
1.61352	0.967934		0.540024	0.887629		0.815577	1.23906
1.10695	1.27791		1.15621	0.86686		1.01455	1.15758
1.98451	1.02043		0.9283	0.582086		0.837991	0.716209
0.972037	0.846137		1.38229	1.28261		0.775569	0.908697
1.07498	1.15395		0.693922	0.803556		0.824668	1.02242
1.10906	0.958422		1.00293	0.991597		0.781458	1.16296
1.73789	1.03794		1.14942	0.820708		2.15873	1.89443
0.518172	0.379282		0.585351	0.437453		1.14046	0.917654
0.661841	0.684177		0.953603	1.1091		1.32022	1.14239
0.978363	0.787051		0.507955	0.619195		0.760111	1.51569
0.491121	0.830787		1.0936	1.64235		1.11322	1.48616
1.56574	1.29981		1.71443	2.0672		0.363272	1.63121
0.985054	0.765862		0.751889	1.07018		0.681714	0.767234
0.73633	0.469724		0.989991	1.34859		0.386202	0.39035
0.81397	1.2072		0.704094	1.0476		1.04017	0.345564
1.49794	1.63973		1.38567	1.38115		0.761178	0.896156
0.988568	0.490158		1.51489	1.19492		0.692388	0.954348
0.672046	0.759319		0.830221	0.827069		0.540344	0.850505
0.654133	0.867276		1.08437	0.978937		0.6321	0.290091
0.554362	0.579895		1.02885	0.986171		1.52077	1.32499
0.867709	1.01972		1.16579	0.795448		0.697725	1.07882
0.856123	0.776834		0.577946	0.756831		0.713699	1.01526
1.19441	1.37933		0.898964	1.17221		1.05456	1.14684
0.72404	0.78851		0.95183	1.10529		0.936152	0.999999
0.857165	0.583519		0.874963	1.07303		0.603834	1.11731
1.58894	1.30856		2.43744	2.3702		1.39114	1.26859
1.0943	0.997125		0.677034	0.533862		1.25831	1.30263
1.34547	0.984694		0.744966	0.624216		1.15378	0.917654
0.537128	0.520053		0.684964	0.699915		1.45515	1.48437
0.517809	0.815487		1.42226	1.21852		0.441153	0.999134
0.749686	1.30494		1.54562	1.43562		1.06788	1.40202
0.33795	0.496751		1.13649	1.68437		1.00387	1.32592
1.2833	1.09995		0.861183	0.89645		1.20605	1.351
1.49583	1.27721		0.598634	0.998543		0.959597	1.0779
0.894058	0.760024		0.46506	1.30478		1.03107	0.861254
1.65041	1.20499		0.61141	0.624823		0.956432	0.588213
1.1909	1.37495		0.437993	0.784399		1.11002	0.452989
0.708915	0.772455		0.849676	0.811966		0.700375	0.199654
0.931993	1.00296		0.896162	0.944541		1.27005	0.803063
1.2675	0.652118		1.08847	1.17569		0.975608	0.938225
1.94129	0.85414		0.602722	0.658827		1.18577	0.878242
0.662908	0.761483		0.905361	0.99324		1.90911	1.36348
1.02262	1.40122		0.847385	0.798486		0.364339	1.23369
1.51622	1.37641		1.0259	1.19273		0.432062	0.350074
0.87229	1.33192		0.881853	0.696393		0.437398	0.441376
0.7293	0.825704		0.479105	0.579039		1.32235	1.57209
0.597218	0.704611		0.517168	0.48986		0.742517	1.04929
0.853311	0.620007		0.767452	1.03433		0.870012	0.569372
1.14593	0.836625		0.986827	0.935757		0.877484	1.29639
0.894058	0.654986		0.675765	1.30183		1.09243	1.4987
0.595109	0.888414		0.823631	1.0085		1.29994	1.32771
0.965371	1.41798		0.987849	1.19038		1.03855	1.01526
1.09149	0.566759		0.659676	0.764442		0.953745	0.711761
1.47089	0.759319		1.35764	1.16221		1.63012	0.812885
0.753879	0.881871		0.560588	0.70283		0.8508	0.565789
0.665017	1.06638		0.335327	0.876493		0.736629	0.35273
0.622864	0.436205		1.78799	1.15342		0.990035	1.04392
0.679051	0.676175		1.36557	1.60515		1.07057	0.651778
1.15296	1.17509		0.859897	0.969194		0.864123	0.477205
1.10414	0.679094		0.925027	0.625997		0.914289	0.775326
1.21094	1.31511		0.806009	0.843663		1.06309	0.96244
0.902832	0.921229		1.19804	1.02081		1.01028	0.479861
0.777077	0.590816		1.13496	1.09533		1.04443	0.8935
0.787621	0.790674		0.978404	0.749788		1.2946	1.22566
0.970995	1.76082		0.801163	0.732178		0.969203	1.16475
0.917594	0.622172		0.787629	0.933976		0.736629	0.49061
0.435273	1.17801		1.20314	0.759746		1.3458	0.691128
1.24607	1.34797		0.692101	0.67174		0.668906	0.560414
0.76583	1.00075		1.37578	0.93515		0.737696	0.328576
0.776374	0.760779		1.48075	1.45788		1.05191	0.581047
0.557174	1.21445		0.693387	0.86358		0.714251	0.455707
0.529056	0.823489		0.93116	1.04194		0.972958	0.683098
0.947094	1.12184		0.989629	1.08946		0.911603	0.32765
0.59334	0.520053		0.386413	0.394244		1.12603	0.91858
1.20181	0.738885		0.702586	0.640084		0.471554	0.535396
0.705061	0.721371		0.784052	0.593734		0.552085	0.430627
0.880702	0.522972		1.66795	1.2913		0.890255	0.770817
0.862788	0.621467		0.954896	0.9158		0.847045	0.463738
0.781634	0.807434		1.11325	0.865361		1.50263	0.934642
1.47722	1.25607		0.832565	1.13755		1.15912	0.78694
0.919364	1.01534		0.831543	1.00441		0.871595	1.58376
1.0704	0.959177		0.478083	0.553253		0.900414	0.951691
1.48388	1.15249		0.874963	0.807878		0.773986	0.98752
1.43085	1.55659		1.88019	1.16456		0.496067	0.29633
0.559962	0.978151		1.16969	0.79379		0.708362	0.775326
0.562071	1.0387		1.01849	0.929321		1.16659	0.741289
0.847348	0.629469		0.473501	1.21795		0.578769	0.590869
0.69488	0.591571		1.25907	1.00028		0.839611	0.715344
0.832586	0.892793		1.83472	1.76825		1.05297	1.0063
1.30368	0.927822		0.686233	0.776748		0.815577	0.726957
1.02931	1.27499		0.997806	1.26604		1.01668	0.816468
0.943943	1.20644		1.69784	1.12994		1.21138	0.675932
1.03036	0.924903		1.02692	0.344371		1.15857	0.829935
1.25273	0.947501		0.703854	0.991499		1.18739	0.921237
1.15999	1.03065		0.422168	0.547383		0.740383	0.52823
0.681524	0.710449		1.23022	1.50014		0.708362	0.325858
1.31949	1.23926		1.45342	1.23791		1.51702	1.02063
1.23097	1.07443		0.68292	0.803182		1.58106	0.701012
1.02931	1.00442		1.4948	0.912885		0.565961	0.427044
0.616174	0.53173		0.362906	0.481682		1.29405	0.556832
0.900724	0.796512		0.372104	0.96802		1.261	0.568507
0.92077	0.620712		0.626477	0.63126		0.865191	0.532678
0.839615	0.830082		1.61535	1.80755		1.98324	0.925746
1.40098	0.702447		0.751363	1.10825		0.993753	0.389424
0.546969	0.35301		0.596079	0.587864		1.20711	0.608784
0.986799	0.620007		0.821586	1.05659		0.896144	0.454781
0.759164	0.759319		0.954139	0.611302		1.59865	0.683098
1.57032	1.12401		0.710745	0.614258		0.768649	0.876451
0.921449	0.734507		0.892074	1.01729		0.882821	0.676859
0.95519	0.504753		0.53479	0.440594		1.67547	0.79948
0.950973	0.681258		0.600414	0.827794		1.21194	0.444959
0.751431	0.836625		1.00981	0.711047		0.993238	0.70546
0.952718	0.887709		0.753918	0.677043		1.45301	0.872868
0.839252	0.726504		1.00521	0.643606		1.27274	0.819186
0.854014	0.733802		0.555478	0.610736		0.979877	0.677723
0.881768	0.665203		1.22818	1.47784		1.2914	1.19965
0.825896	0.716287		1.55073	0.876493		1.23218	0.461082
1.46738	0.603952		1.31347	0.651217		0.828385	0.632072
0.885622	0.657201		1.78313	1.44675		1.11805	1.03045
1.10729	0.684932		1.76143	0.787921		0.801186	0.736841
0.942901	0.767321		2.47116	2.15075		1.19166	1.01526
0.566652	0.711154		1.05425	0.809618		0.870527	0.940943
0.549078	0.741804		1.77113	1.25608		1.74959	0.890782
0.674155	0.563085		1.24478	1.34174		0.860406	1.17636
1.05566	0.444207		0.616767	0.427114		0.972958	1.36885
1.39817	0.73964		0.631076	0.7357		0.645424	0.789658
0.787258	0.439124		1.31884	1.88734		0.859339	0.875586
0.727531	0.598869		1.23353	0.98563		1.261	1.19786
1.48248	1.04524		0.570034	1.22499		0.864123	0.992833
0.773926	1.08097		0.995761	0.811359		1.57411	0.928403
0.587013	0.587897		1.58086	1.10003		1.09243	1.74401
0.941495	0.870195		1.14416	1.09242		1.18312	1.1343
0.608805	0.939498		1.63195	1.70137		1.98486	1.49512
0.940428	0.843923		0.759786	1.41448		0.651828	0.629354
0.781634	0.681258		0.650478	0.552646		0.522751	0.952556
0.909523	0.747643		1.35535	0.775007		1.06788	1.02421
0.842766	1.46463		0.51308	0.732178		1.36129	0.97498
0.587716	1.09632		0.903828	0.972109		1.04123	0.894365
0.611956	0.726504		0.480391	0.917581		0.84918	0.913206
0.773562	0.952634		0.534526	0.830142		0.688634	0.641894
0.798505	0.799432		0.45128	1.2983		0.755326	0.934642
0.783403	0.768076		0.650989	1.48079		1.63226	0.928403
0.887392	0.61271		1.10763	1.19743		0.754774	0.758277
0.460215	0.62655		1.13905	1.36109		1.42902	0.523721
0.557853	0.67688		2.0227	1.63098		1.74319	1.38769
0.663247	0.458048		1.8807	1.91082		1.19111	0.745737
0.396271	0.553623		0.99807	0.690524		2.35078	1.60699
1.73367	0.7411		1.92308	2.19184		1.44716	1.46466
0.512185	0.493832		1.60742	0.894669		1.75762	1.86576
0.518512	0.194775		1.17735	1.09355		0.897212	0.853224
0.916892	0.593735		1.12142	1.05777		1.79015	1.13967
0.383981	0.571842		0.64001	0.485204		1.60933	1.12355
1.69853	0.949715		0.722745	0.438246		1.03696	1.01526
0.681524	0.618548		1.00292	0.990325		1.61945	1.18804
1.68308	0.824949		1.33262	1.37518		0.939869	0.740424
0.859637	0.570383		0.570545	0.840708		0.567543	0.781566
0.721229	0.552918		0.763875	1.06542
0.552956	0.328248		1.54282	1.81286
0.934465	0.648444		0.768474	1.32413
0.7293	0.569678		0.972271	0.881796
1.8763	1.00296		1.12678	0.748006
1.10555	0.814027		1.00087	0.960977
0.572978	0.584978		1.34411	0.704611
0.614065	0.767321		0.93345	0.575517
0.587716	0.374199		0.788387	0.90406
0.706806	0.779753		1.75044	1.18743
1.36268	0.845382		0.736807	0.934583
1.03213	0.528106		0.901784	1.17982
0.777416	0.557247		1.05502	1.58167
0.875442	0.66012		1.34182	1.43209
0.646037	0.760024		0.986069	1.14521
0.723337	0.957717		0.671413	1.08477
0.762678	0.59741		0.637191	0.804356
0.751092	0.578435		0.597612	1.47375
1.54046	0.637522		0.916093	0.752702
0.648849	0.422314		1.02974	0.659434
0.530826	0.471183		0.858363	0.85184
0.589825	0.635308		0.939318	0.723961
0.550145	0.411392		1.01236	0.508643
0.356227	0.257485		0.719943	0.840708
0.43983	0.806729		0.423684	0.792009
0.393095	0.444962		1.91619	1.35874
0.478468	0.197694		0.842786	1.24199
0.472505	0.576221		1.07621	1.16634
0.466178	0.792134		1.21464	1.56467
0.529056	0.676175		1.0494	0.994414
0.570506	0.688556		1.11554	0.504554
0.651321	0.72429		0.579743	0.58669
0.300354	0.444207		0.695678	0.765049
0.551551	0.568923		1.0522	1.02433
1.92197	1.55291		1.15922	1.2326
0.77252	0.780457		1.18143	1.33761
0.522729	0.735966		1.48049	1.36226
0.593	0.587897		0.763875	0.766223
0.566761	0.733715		0.820053	1.03785
1.62128	1.68523		0.430327	0.635389
0.948567	1.1135		0.540411	0.78614
0.778433	0.744091		1.18322	1.17864
1.48974	1.588		2.13583	1.912
1.16338	1.00849		2.47524	1.69198
0.426024	1.22369		1.54282	1.46258
1.26844	1.26645		0.405815	0.849533
0.564516	0.388906		1.68455	1.68789
0.570587	1.03443		1.4164	1.02141
0.589436	0.898293		1.55149	1.15282
0.747675	1.13684		1.40951	1.07598
0.776188	1.10312		1.04429	1.63215
0.595724	1.6567		1.55328	1.29013
1.12231	1.15115		1.38729	1.41857
0.876518	1.0643		1.11274	0.841882
0.621975	0.587205		0.696453	1.49075
0.638145	0.943731		2.32814	1.7172
0.556663	1.4609		0.732719	1.0402
1.33217	1.81609		0.940341	1.02376
1.08975	0.75706		0.623657	1.05777
1.11938	1.07074		2.54573	1.7489
0.31829	0.49776		1.83115	1.07833
0.438816	0.729779		1.35764	1.09533
0.353974	0.622267		1.29764	1.48314
0.909972	0.545702		1.43095	0.897624
1.3351	1.25223		2.01477	1.60398
1.07899	0.834788		1.56017	1.49192
0.754195	0.611891		0.826961	0.931061
0.882357	1.2872		0.96154	0.860665
0.502564	0.598922		1.37731	0.795531
0.420417	0.714306		1.6889	1.46962
0.378894	1.02799		1.49582	1.31591
0.786967	1.44409		0.717899	0.529167
1.3223	2.18424		0.767452	1.15634
1.15778	2.41241		1.25269	0.916974
0.805584	1.09668		0.598898	0.763268
1.07944	1.71886		0.445147	0.479335
0.906595	1.65017		1.18884	1.01789
0.749022	1.04096		0.378483	0.635955
0.777984	0.955359		1.30836	1.08772
0.409188	1.09409		0.615234	0.72809
1.24688	1.92628		1.12167	1.27956
0.682812	1.02405		0.46328	0.914059
0.399989	0.698742		1.32471	1.25726
1.30637	1.05777		0.423684	0.659434
1.19055	1.21072		0.759275	1.01085
1.11782	1.12262		0.486012	0.359633
0.666193	0.679243		1.04812	0.56147
1.41343	0.952765		1.58802	1.11177
1.18516	1.42333		1.47615	1.21208
1.74991	1.44274		1.21871	1.02316
0.775955	1.06815		1.58546	1.67733
0.715584	0.635147		1.10942	1.07011
1.04509	0.613144		1.43606	1.76299
1.17774	0.859474		0.640768	0.755657
1.01007	1.35205		1.57397	1.00324
0.707948	1.13944		1.62097	1.57819
1.26326	1.55169		0.858363	0.764442
1.26057	1.23022		1.00216	0.824273
0.562951	0.674055		0.594546	0.553253
0.762713	1.77852		1.04225	1.1229
1.47965	1.3948		1.11478	0.753309
0.993916	1.13944		0.567478	0.542687
0.531077	0.723339		0.714075	0.856536
0.883023	0.951513		1.60486	1.26547
0.757339	1.18872		0.750341	0.732178
0.898294	0.525041		1.41153	0.982674
1.21006	1.01502		2.10339	1.99587
1.32949	1.55553		0.940341	1.11351
0.324578	0.745343		1.02054	0.939279
0.473618	0.541856		1.01287	1.12877
0.615703	0.558672		0.778677	0.875926
0.315146	0.311089		1.13878	0.72809
0.296731	0.712964		1.08285	1.14521
0.43702	0.344809		1.50093	1.34348
0.670236	1.35071		0.770518	1.27426
1.45675	1.00071		1.40515	1.23321
0.872476	0.817972		1.161	1.13638
0.910421	1.05912		0.568747	0.55382
1.12994	1.02665		0.949292	1.15694
0.555765	1.31707		0.655077	0.486945
1.08393	1.09793		0.361126	0.123791
0.712223	0.77647		0.577699	0.407724
1.2525	1.17056		1.338	0.995588
1.50232	0.87629		0.642812	0.731571
0.888645	0.517259		1.84059	1.35992
0.415925	0.576829		1.86435	1.23378
0.514908	1.10831		0.644856	0.596648
0.550375	0.617079		1.06754	1.374
0.689549	0.670209		0.644099	1.27369
0.441295	1.14981		0.514102	0.81901
0.469343	1.20035		1.36736	1.02259
0.59594	0.758312		0.833076	0.933976
0.580003	0.745343		1.31347	1.20151
1.27494	0.843911		1.32393	0.803749
0.711774	0.881478		1.17327	1.88499
0.744081	0.536668		1.21182	1.36287
0.505259	0.880225		1.88401	1.38339
1.50726	0.897041		1.38166	0.949844
0.433442	0.422626		1.08438	1.21852
0.490453	0.514665		0.786343	0.807878
1.42332	1.04999		1.12729	1.19273
0.60291	0.733715		1.06447	2.04752
0.877416	1.10831		0.95183	0.703437
0.827143	1.73836		0.618811	0.858884
0.900307	0.601516		0.950315	1.3517
1.04509	0.59114		0.918119	1.40335
0.34544	0.609297		1.13853	0.767397
1.35732	1.05259		1.63552	1.93252
1.25922	1.03702		0.549857	0.718698
1.14206	1.33908		0.821586	1.24143
0.469575	0.864662		0.650742	0.753309
1.21905	1.03443		0.729142	0.746833
1.58739	1.44274		0.429816	0.775007
1.15934	1.21466		1.52622	0.955714
1.87201	1.66832		1.81301	1.58871
1.18381	0.843911		0.78992	0.408331
1.04958	0.886666		0.659412	0.476379
0.645099	0.483538		0.743698	0.480509
0.893585	1.09149		0.362659	0.715743
1.40535	1.15894		1.38702	0.827794
1.17416	0.773876		1.88732	0.878841
1.30637	1.38058		0.570791	0.647695
0.305265	0.548296		0.560077	0.478161
0.620411	0.526293		0.354993	0.537991
0.527701	0.470569		0.782008	0.955714
0.848469	0.96967		1.92488	1.77942
1.0644	1.26001		0.550879	0.584909
0.834097	0.910011		0.476303	0.429462
1.37953	1.16019		0.303661	0.627738
1.63677	0.811442		1.25831	1.34057
1.9077	0.875038		1.71086	1.32239
0.589885	0.514665		1.05885	0.508643
1.03567	1.29498		1.39469	0.891754
1.20311	0.469227		0.738341	0.672348
0.834995	0.598922		0.926049	0.936931
0.495394	0.741497		1.61995	1.1933
0.610313	1.11224		1.20953	0.729831
0.423561	1.1135		1.85746	1.77003
1.02938	0.990332		1.03791	0.816662
0.768552	0.455005		0.489079	0.878841
1.07022	0.583358		0.59481	0.502773
1.47718	1.14337		1.73793	1.71898
1.20065	0.653304		1.29125	1.269
1.18942	0.720746		0.486259	0.707526
1.07046	0.553484		0.62008	0.860058
1.31961	0.562607		0.800652	0.892928
0.739822	0.500354		0.786343	0.71635
1.4123	0.464039		1.50935	1.27661
0.638362	0.851693		2.18614	1.66793
1.44957	2.00016		0.528146	0.816055
0.823549	0.709118		0.532235	0.952192
1.29537	0.947577		0.842275	0.795531
1.2186	0.569047		0.375682	0.815488
1.04823	0.780405		0.808317	1.50132
1.23813	0.86332		0.896427	0.89645
0.695837	0.413503		0.602211	0.543254
0.580453	0.422626		1.38906	1.14577
0.609864	0.672803		0.555478	1.08007
0.776188	0.895699		1.19267	0.89058
0.627148	0.470569		0.624433	0.701089
1.06821	1.00464		0.7087	0.892321
1.40603	0.738903		0.484726	0.5943
0.711092	0.42522		0.808564	0.583735
0.446235	0.872444		1.92308	1.85099
0.718945	0.455005		1.75121	1.26487
0.527252	0.981298		0.525856	1.16868
0.493597	0.295525		1.70268	1.81929
1.72925	0.626113		1.34258	1.23204
1.59771	0.698742		0.48166	0.931061
1.81567	0.64427		0.849429	1.18625
0.916476	0.54445		0.915071	0.404242
1.74249	0.841317		0.71841	2.42885
1.17708	0.37853		0.680611	0.847185
0.435672	0.180142		1.09307	1.0795
0.672714	0.286491		0.844319	1.63272
1.17887	0.416097		0.989382	1.19038
0.56879	0.401875		0.387435	1.2983
1.17954	0.279962		1.31296	1.27487
1.37123	1.39221		0.63668	1.07655
0.512895	0.570389		0.564148	0.622475
1.01052	0.780405		1.65264	1.17338
0.610313	0.858133		0.922719	0.942193
1.09852	0.3915		0.565945	1.11938
1.30951	1.4143		0.611921	0.868883
1.99412	1.01368		0.609877	0.537991
1.26147	1.18478		0.405551	0.755657
0.929486	1.59838		0.738852	0.68348
2.05697	1.93147		0.557258	0.573169
0.984267	0.925574		1.39544	0.884144
0.552404	1.07459		0.536059	0.613084
0.954855	0.902229		1.64293	1.01259
2.24462	1.88353		0.898964	1.01437
1.8994	2.02744		0.631076	1.39866
2.07963	1.86537		1.48893	1.90086
1.04868	1.38058		1.04736	0.879448
0.996161	1.80186		0.649209	0.55382
1.30076	1.85374		0.77843	1.68963
1.22758	1.76948		0.821851	1.13934
0.36542	0.684431		1.69348	1.83103
0.586075	0.854287		1.27747	1.48371
0.547231	0.642929		0.91456	1.03315
0.507056	1.03443		1.69937	0.965106
1.15149	1.3948		1.4902	0.449379
1.13846	1.49721		0.904075	0.880015
0.442859	0.75706		1.66131	1.73894
1.43722	1.7007		0.542702	0.398373
2.28524	1.79408		1.07367	1.16868
0.998175	0.56386		0.771276	0.976238
0.881691	0.646864		1.51242	1.23965
1.0626	1.28201		0.953363	1.66381
1.68346	2.07664		0.767452	1.21969
1.20266	0.965735		0.968448	0.484597
2.06302	1.2872		0.589435	0.674696
1.14475	0.948919		0.905097	0.951585
1.87986	1.21466		0.567478	0.754483
1.12231	0.86985		0.361637	0.315063
1.34969	0.701336		0.395083	0.842489
1.01232	0.865914		0.601947	0.811966
0.613225	0.740155		0.294215	0.923451
0.675176	0.996861		1.22204	0.935757
0.742966	1.80312		1.69451	1.50071
1.1966	1.1109		0.62979	0.664697
1.94877	0.701336		1.62862	1.74125
2.12295	1.39355		0.46839	0.610736
1.24307	1.21725		1.36455	0.973283
1.03612	0.799815		0.870875	1.01494
1.97594	1.22244		0.999092	0.919322
1.25676	0.92942		1.39775	1.34996
1.4159	1.30017		1.00394	1.2596
2.19052	1.47521		0.860919	0.834838
1.06327	1.36108		1.22715	1.07011
0.80896	0.898293		0.441817	0.543861
1.15036	0.727186		2.23901	1.41509
0.777535	1.18613		0.913273	0.7087
0.416375	0.515917		0.593277	0.953933
0.781794	1.10053		0.537856	0.5943
0.537366	1.31707		0.479616	0.668826
0.782476	1.18478		1.06778	0.790835
0.903234	0.7635		0.633367	0.675262
1.37908	1.33523		0.724543	0.448205
1.19952	1.85634		1.92003	1.32413
0.662166	0.423879		1.09767	0.853621
0.681247	1.00464		0.831032	0.61952
1.1562	0.475756		0.641032	0.326195
1.76763	1.66573		0.48677	0.700482
2.23115	2.55374		1.01007	0.792616
0.730173	0.394093		0.863227	0.753876
1.54699	0.939796		0.934719	0.519208
1.40468	1.72924		0.992449	0.814314
0.527035	0.504289		0.850962	0.656479
0.586973	1.21332		1.66693	1.00206
0.409637	1.22763		1.49122	0.760353
0.556214	0.759654		2.41242	1.41214
0.893353	0.461445		0.898471	0.736874
1.30254	1.82127		1.28027	0.895843
0.667324	1.62163		1.73282	0.778529
1.19592	0.629959		1.3528	0.870056
0.893585	0.925574		1.80459	1.08655
2.09781	0.996861		1.02105	0.922277
1.27225	0.578171		0.539636	0.883537
1.23992	0.881478		1.88299	1.09181
0.853178	0.596328		1.29022	1.20621
1.30748	1.09793		0.825675	0.617172
1.04015	0.92942		1.52571	1.03668
			1.08183	0.617779
			0.687008	0.826054
			1.86946	1.29948
			0.460214	0.776181
			1.18527	1.25082
			0.875985	0.846011
			0.942896	0.977979
			1.13802	1.04663
			1.25294	1.06951
			0.350394	0.604299
			0.892849	1.43383
			1.05298	1.04663
			0.365725	0.293325
			0.382325	1.02081
			1.13393	0.96628
			0.443103	1.23026
			1.94608	1.12407
			0.502101	0.711655
			0.901273	1.34761
			0.778166	1.01085
			0.495458	0.808445
			0.661209	0.937498
			0.919652	0.893495
			0.856584	1.62863
			1.102	1.34761
			0.605789	0.974457
			0.473501	0.660001
			0.253086	0.581994
			0.848918	1.21386
			0.500815	1.67968
			0.333037	0.567907
			0.692612	0.614258
			0.51308	2.06979
			0.380792	0.777922
			0.543213	0.99324
			0.315661	0.782618
			1.31322	1.20738
			0.984025	1.57289
			1.09	0.923451
			1.28589	1.96422
			0.503634	1.29596
			0.798096	0.862406
			0.409128	0.869449
			0.622124	0.726916
			0.62519	0.482856
			0.756474	0.462292
			0.329195	0.333239
			0.664522	0.665871
			0.763875	0.842489
			1.52111	1.58519
			0.488303	0.781444
			1.53235	0.992673
			1.79157	1.10059
			0.56799	0.601344
			0.77843	0.393677
			1.40593	1.07068
			0.572836	0.545602
			1.31475	0.872971
			1.58802	0.740396
			0.623921	0.571995
			1.02794	0.857143
			0.699519	0.608955
			1.28538	1.1446
			0.501326	0.608388
			0.767963	0.583168
			0.342729	0.390155
			0.56161	0.9158
			1.08285	0.433551
			0.579743	0.768571
			0.753143	0.847751
			0.776633	0.768571
			0.998317	0.645347
			1.38651	1.04898
			0.409392	1.44557
			1.72081	1.48079
			0.972782	0.601344
			0.617014	0.809618
