# Supplementary material for: An optimized CRISPR/Cas9 approach for precise genome editing in neurons
Source: eLife. 2021 Mar 10;10:e65202. doi: 10.7554/eLife.65202 (PMC7946428; doi:10.7554/eLife.65202)
Supplement: Figure 5—source data 1. [file elife-65202-fig5-data1.xlsx]

## Sheet: Fig5
SEP + /HA + cells
Animal	Slice identifier	No. of SEP +ve cells	No. of Cas9 cells	SEP +ve / Cas9 +ve (%)
1	1	7	62	11.2903
1	2	15	77	19.4805
2	1	7	70	10
2	2	16	83	19.2771
2	3	12	102	11.7647
2	4	6	73	8.21918
2	5	9	68	13.2353
2	6	8	54	14.8148
3	1	11	60	18.3333
3	2	13	55	23.6364
3	3	14	77	18.1818
Animal	1	2	3
Animal efficiency	15.3854	12.8852	20.0505
Overall average	16.107
