# Supplementary material for: An optimized CRISPR/Cas9 approach for precise genome editing in neurons
Source: eLife. 2021 Mar 10;10:e65202. doi: 10.7554/eLife.65202 (PMC7946428; doi:10.7554/eLife.65202)
Supplement: Figure 7—source data 1. [file elife-65202-fig7-data1.xlsx]

## Sheet: Fig7
Panel C
SEP + /mCherry + cells
%	SEP-rGluA1	SEP-rGluA2
Exp.#1	13.04 (15/115)	26.09 (36/138)
Exp.#2	9.76 (4/41)	28.40 (23/81)
Exp.#3	18.82 (16/85)	35.00 (14/40)
Ave.	13.87	29.83
