# Supplementary material for: An optimized CRISPR/Cas9 approach for precise genome editing in neurons
Source: eLife. 2021 Mar 10;10:e65202. doi: 10.7554/eLife.65202 (PMC7946428; doi:10.7554/eLife.65202)
Supplement: Figure 7—source data 2. — Source Data for figure supplements. [file elife-65202-fig7-data2.xlsx]

## Sheet: Fig7
Panel F
SEP-rGluA1 fluorescent intensity
Time (min)	ROI01	ROI02	ROI03	ROI04	ROI05	ROI06	ROI07	ROI08	ROI09	ROI10	ROI11	ROI12	ROI13	ROI14	ROI15	ROI16	ROI17	ROI18	ROI19	ROI20	ROI21	ROI22	ROI23	ROI24	ROI25	ROI26	ROI27	ROI28	ROI29	ROI30	ROI31	ROI32	ROI33	ROI34	ROI35	ROI36	ROI37	ROI38	ROI39	ROI40	ROI41	ROI42	ROI43	ROI44	ROI45	ROI46
-2	1.01485	0.963665	0.996583	1.0193	1.06818	1.02587	1.0152	0.956032	1.00577	0.942825	1.04362	0.968958	1.03316	1.00539	1.08077	0.983784	1.0388	1.02433	1.00109	1.02031	1.00168	0.972716	1.07262	1.05311	0.983893	0.907317	1.06329	1.04279	0.930201	0.979192	0.929427	0.965831	1.10706	1.09669	1.07718	1.04196	1.14819	1.04745	1.01078	0.995289	1.01807	1.00566	0.987254	1.0117	0.947689	0.957047
-1	0.985149	1.03634	1.00342	0.9807	0.931818	0.974128	0.984799	1.04397	0.994226	1.05717	0.956383	1.03104	0.966837	0.994612	0.919231	1.01622	0.961197	0.975666	0.998908	0.979689	0.998319	1.02728	0.927383	0.946891	1.01611	1.09268	0.936709	0.957213	1.0698	1.02081	1.07057	1.03417	0.892938	0.903311	0.922822	0.958042	0.851807	0.952546	0.989222	1.00471	0.981928	0.994337	1.01275	0.988296	1.05231	1.04295
0	0	0	0	0	0	0	0	0	0	0	0	0	0	0	0	0	0	0	0	0	0	0	0	0	0	0	0	0	0	0	0	0	0	0	0	0	0	0	0	0	0	0	0	0	0	0
1	0.111386	0.121643	0.14123	0.127865	0.271307	0.218223	0.100977	0.204059	0.143187	0.118834	0.269149	0.159645	0.132653	0.052802	0.207692	0.202703	0.136364	0.183082	0.093886	0.157706	0.32605	0.223013	0.237519	0.216321	0.287248	0.281301	0.146273	0.145477	0.249664	0.175031	0.143808	0.111617	0.048975	0.258278	0.07387	0.088578	0.159036	0.177083	0.118563	0.077739	0.119277	0.142695	0.11124	0.139142	0.158151	0.077852
2	0.106436	0.317536	0.177677	0.287093	0.318182	0.340832	0.156352	0.291995	0.286374	0.256726	0.454255	0.247228	0.295918	0.09806	0.321795	0.394595	0.325942	0.225956	0.19214	0.225806	0.314286	0.390273	0.252648	0.244819	0.316779	0.291057	0.257384	0.235941	0.29396	0.317013	0.182423	0.165148	0.181093	0.299338	0.115766	0.068765	0.366265	0.211806	0.161677	0.256773	0.131325	0.206116	0.146002	0.136541	0.266423	0.178523
3	0.195545	0.314376	0.291572	0.524729	0.43892	0.425197	0.237785	0.349493	0.274827	0.38565	0.478723	0.291574	0.320153	0.115302	0.387179	0.586486	0.325942	0.395133	0.298035	0.278375	0.391597	0.415184	0.503782	0.319948	0.432215	0.339837	0.481013	0.256724	0.144966	0.372093	0.110519	0.200456	0.104784	0.422517	0.15656	0.145688	0.253012	0.262731	0.22515	0.220259	0.228916	0.293318	0.17613	0.141743	0.354015	0.195973
4	0.272277	0.399684	0.356492	0.512666	0.356534	0.466817	0.297503	0.390079	0.36836	0.441704	0.55	0.345898	0.397959	0.150862	0.473077	0.635135	0.315965	0.404403	0.331878	0.383513	0.460504	0.349941	0.481089	0.351036	0.303356	0.195122	0.320675	0.333741	0.226846	0.335373	0.181092	0.238041	0.186788	0.339073	0.262404	0.102564	0.249398	0.326389	0.323353	0.336867	0.255422	0.330691	0.227115	0.218466	0.384428	0.209396
5	0.230198	0.406003	0.378132	0.496984	0.566761	0.501687	0.267101	0.429538	0.446882	0.331839	0.538298	0.409091	0.394133	0.179957	0.574359	0.62027	0.399113	0.351101	0.377729	0.422939	0.596639	0.459075	0.431165	0.349741	0.367785	0.20813	0.482419	0.462103	0.256376	0.439412	0.165113	0.176538	0.198178	0.474172	0.194046	0.174825	0.421687	0.350694	0.31497	0.306243	0.251807	0.339751	0.290846	0.258778	0.417275	0.245638
6	0.282178	0.423381	0.35877	0.53076	0.413352	0.534308	0.334419	0.493799	0.497691	0.534753	0.630851	0.508869	0.470663	0.220905	0.669231	0.7	0.339246	0.497103	0.399563	0.369176	0.583193	0.516014	0.502269	0.362694	0.346309	0.209756	0.419128	0.5978	0.18255	0.430845	0.258322	0.230068	0.189066	0.454305	0.262404	0.187646	0.507229	0.430556	0.433533	0.375736	0.251807	0.390713	0.265353	0.308192	0.497567	0.202685
7	0.24505	0.380727	0.404328	0.581423	0.431818	0.556805	0.389794	0.526494	0.532333	0.59417	0.62766	0.539911	0.355867	0.203664	0.891026	0.656757	0.412417	0.449594	0.395197	0.487455	0.556303	0.58363	0.602118	0.388601	0.587919	0.385366	0.548523	0.41687	0.379866	0.5153	0.268975	0.164009	0.264237	0.568212	0.274531	0.280886	0.461446	0.33912	0.461078	0.358068	0.310843	0.335221	0.254925	0.23277	0.440389	0.29396
8	0.381188	0.385466	0.400911	0.457177	0.430398	0.554556	0.380022	0.568207	0.545035	0.513453	0.647872	0.513304	0.334184	0.216595	0.876923	0.728378	0.45898	0.441483	0.45524	0.541219	0.467227	0.552788	0.446293	0.550518	0.49396	0.331707	0.912799	0.50978	0.245638	0.506732	0.314248	0.238041	0.230068	0.582781	0.29989	0.250583	0.368675	0.425926	0.470659	0.394582	0.336145	0.455266	0.312862	0.370611	0.445255	0.138255
9	0.321782	0.540284	0.441913	0.546441	0.372159	0.550056	0.391965	0.518602	0.6097	0.530269	0.693617	0.588692	0.409439	0.251078	1.1	0.7	0.496674	0.516802	0.467249	0.492234	0.556303	0.569395	0.461422	0.446891	0.47651	0.386992	0.59353	0.59291	0.339597	0.543452	0.29028	0.280182	0.236902	0.329801	0.300992	0.322844	0.468675	0.533565	0.500599	0.454653	0.324096	0.396376	0.325608	0.317295	0.509732	0.206711
Fitting
Time (min)	ROI01	ROI02	ROI03	ROI04	ROI05	ROI06	ROI07	ROI08	ROI09	ROI10	ROI11	ROI12	ROI13	ROI14	ROI15	ROI16	ROI17	ROI18	ROI19	ROI20	ROI21	ROI22	ROI23	ROI24	ROI25	ROI26	ROI27	ROI28	ROI29	ROI30	ROI31	ROI32	ROI33	ROI34	ROI35	ROI36	ROI37	ROI38	ROI39	ROI40	ROI41	ROI42	ROI43	ROI44	ROI45	ROI46
0	0	0	0	0	0	0	0	0	0	0	0	0	0	0	0	0	0	0	0	0	0	0	0	0	0	0	0	0	0	0	0	0	0	0	0	0	0	0	0	0	0	0	0	0	0	0
1	0.111386	0.121643	0.14123	0.127865	0.271307	0.218223	0.100977	0.204059	0.143187	0.118834	0.269149	0.159645	0.132653	0.052802	0.207692	0.202703	0.136364	0.183082	0.093886	0.157706	0.32605	0.223013	0.237519	0.216321	0.287248	0.281301	0.146273	0.145477	0.249664	0.175031	0.143808	0.111617	0.048975	0.258278	0.07387	0.088578	0.159036	0.177083	0.118563	0.077739	0.119277	0.142695	0.11124	0.139142	0.158151	0.077852
2	0.106436	0.317536	0.177677	0.287093	0.318182	0.340832	0.156352	0.291995	0.286374	0.256726	0.454255	0.247228	0.295918	0.09806	0.321795	0.394595	0.325942	0.225956	0.19214	0.225806	0.314286	0.390273	0.252648	0.244819	0.316779	0.291057	0.257384	0.235941	0.29396	0.317013	0.182423	0.165148	0.181093	0.299338	0.115766	0.068765	0.366265	0.211806	0.161677	0.256773	0.131325	0.206116	0.146002	0.136541	0.266423	0.178523
3	0.195545	0.314376	0.291572	0.524729	0.43892	0.425197	0.237785	0.349493	0.274827	0.38565	0.478723	0.291574	0.320153	0.115302	0.387179	0.586486	0.325942	0.395133	0.298035	0.278375	0.391597	0.415184	0.503782	0.319948	0.432215	0.339837	0.481013	0.256724	0.144966	0.372093	0.110519	0.200456	0.104784	0.422517	0.15656	0.145688	0.253012	0.262731	0.22515	0.220259	0.228916	0.293318	0.17613	0.141743	0.354015	0.195973
4	0.272277	0.399684	0.356492	0.512666	0.356534	0.466817	0.297503	0.390079	0.36836	0.441704	0.55	0.345898	0.397959	0.150862	0.473077	0.635135	0.315965	0.404403	0.331878	0.383513	0.460504	0.349941	0.481089	0.351036	0.303356	0.195122	0.320675	0.333741	0.226846	0.335373	0.181092	0.238041	0.186788	0.339073	0.262404	0.102564	0.249398	0.326389	0.323353	0.336867	0.255422	0.330691	0.227115	0.218466	0.384428	0.209396
5	0.230198	0.406003	0.378132	0.496984	0.566761	0.501687	0.267101	0.429538	0.446882	0.331839	0.538298	0.409091	0.394133	0.179957	0.574359	0.62027	0.399113	0.351101	0.377729	0.422939	0.596639	0.459075	0.431165	0.349741	0.367785	0.20813	0.482419	0.462103	0.256376	0.439412	0.165113	0.176538	0.198178	0.474172	0.194046	0.174825	0.421687	0.350694	0.31497	0.306243	0.251807	0.339751	0.290846	0.258778	0.417275	0.245638
6	0.282178	0.423381	0.35877	0.53076	0.413352	0.534308	0.334419	0.493799	0.497691	0.534753	0.630851	0.508869	0.470663	0.220905	0.669231	0.7	0.339246	0.497103	0.399563	0.369176	0.583193	0.516014	0.502269	0.362694	0.346309	0.209756	0.419128	0.5978	0.18255	0.430845	0.258322	0.230068	0.189066	0.454305	0.262404	0.187646	0.507229	0.430556	0.433533	0.375736	0.251807	0.390713	0.265353	0.308192	0.497567	0.202685
7	0.24505	0.380727	0.404328	0.581423	0.431818	0.556805	0.389794	0.526494	0.532333	0.59417	0.62766	0.539911	0.355867	0.203664	0.891026	0.656757	0.412417	0.449594	0.395197	0.487455	0.556303	0.58363	0.602118	0.388601	0.587919	0.385366	0.548523	0.41687	0.379866	0.5153	0.268975	0.164009	0.264237	0.568212	0.274531	0.280886	0.461446	0.33912	0.461078	0.358068	0.310843	0.335221	0.254925	0.23277	0.440389	0.29396
8	0.381188	0.385466	0.400911	0.457177	0.430398	0.554556	0.380022	0.568207	0.545035	0.513453	0.647872	0.513304	0.334184	0.216595	0.876923	0.728378	0.45898	0.441483	0.45524	0.541219	0.467227	0.552788	0.446293	0.550518	0.49396	0.331707	0.912799	0.50978	0.245638	0.506732	0.314248	0.238041	0.230068	0.582781	0.29989	0.250583	0.368675	0.425926	0.470659	0.394582	0.336145	0.455266	0.312862	0.370611	0.445255	0.138255
9	0.321782	0.540284	0.441913	0.546441	0.372159	0.550056	0.391965	0.518602	0.6097	0.530269	0.693617	0.588692	0.409439	0.251078	1.1	0.7	0.496674	0.516802	0.467249	0.492234	0.556303	0.569395	0.461422	0.446891	0.47651	0.386992	0.59353	0.59291	0.339597	0.543452	0.29028	0.280182	0.236902	0.329801	0.300992	0.322844	0.468675	0.533565	0.500599	0.454653	0.324096	0.396376	0.325608	0.317295	0.509732	0.206711
