# Supplementary material for: An optimized CRISPR/Cas9 approach for precise genome editing in neurons
Source: eLife journal article supplement (doi:10.7554/elife.65202), 2021-03-10
Supplement: figures [file elife-65202-figures-v1.pdf]

---

## Figures and figure supplements

An optimized CRISPR/Cas9 approach for precise genome editing in neurons

**Huaqiang Fang et al**

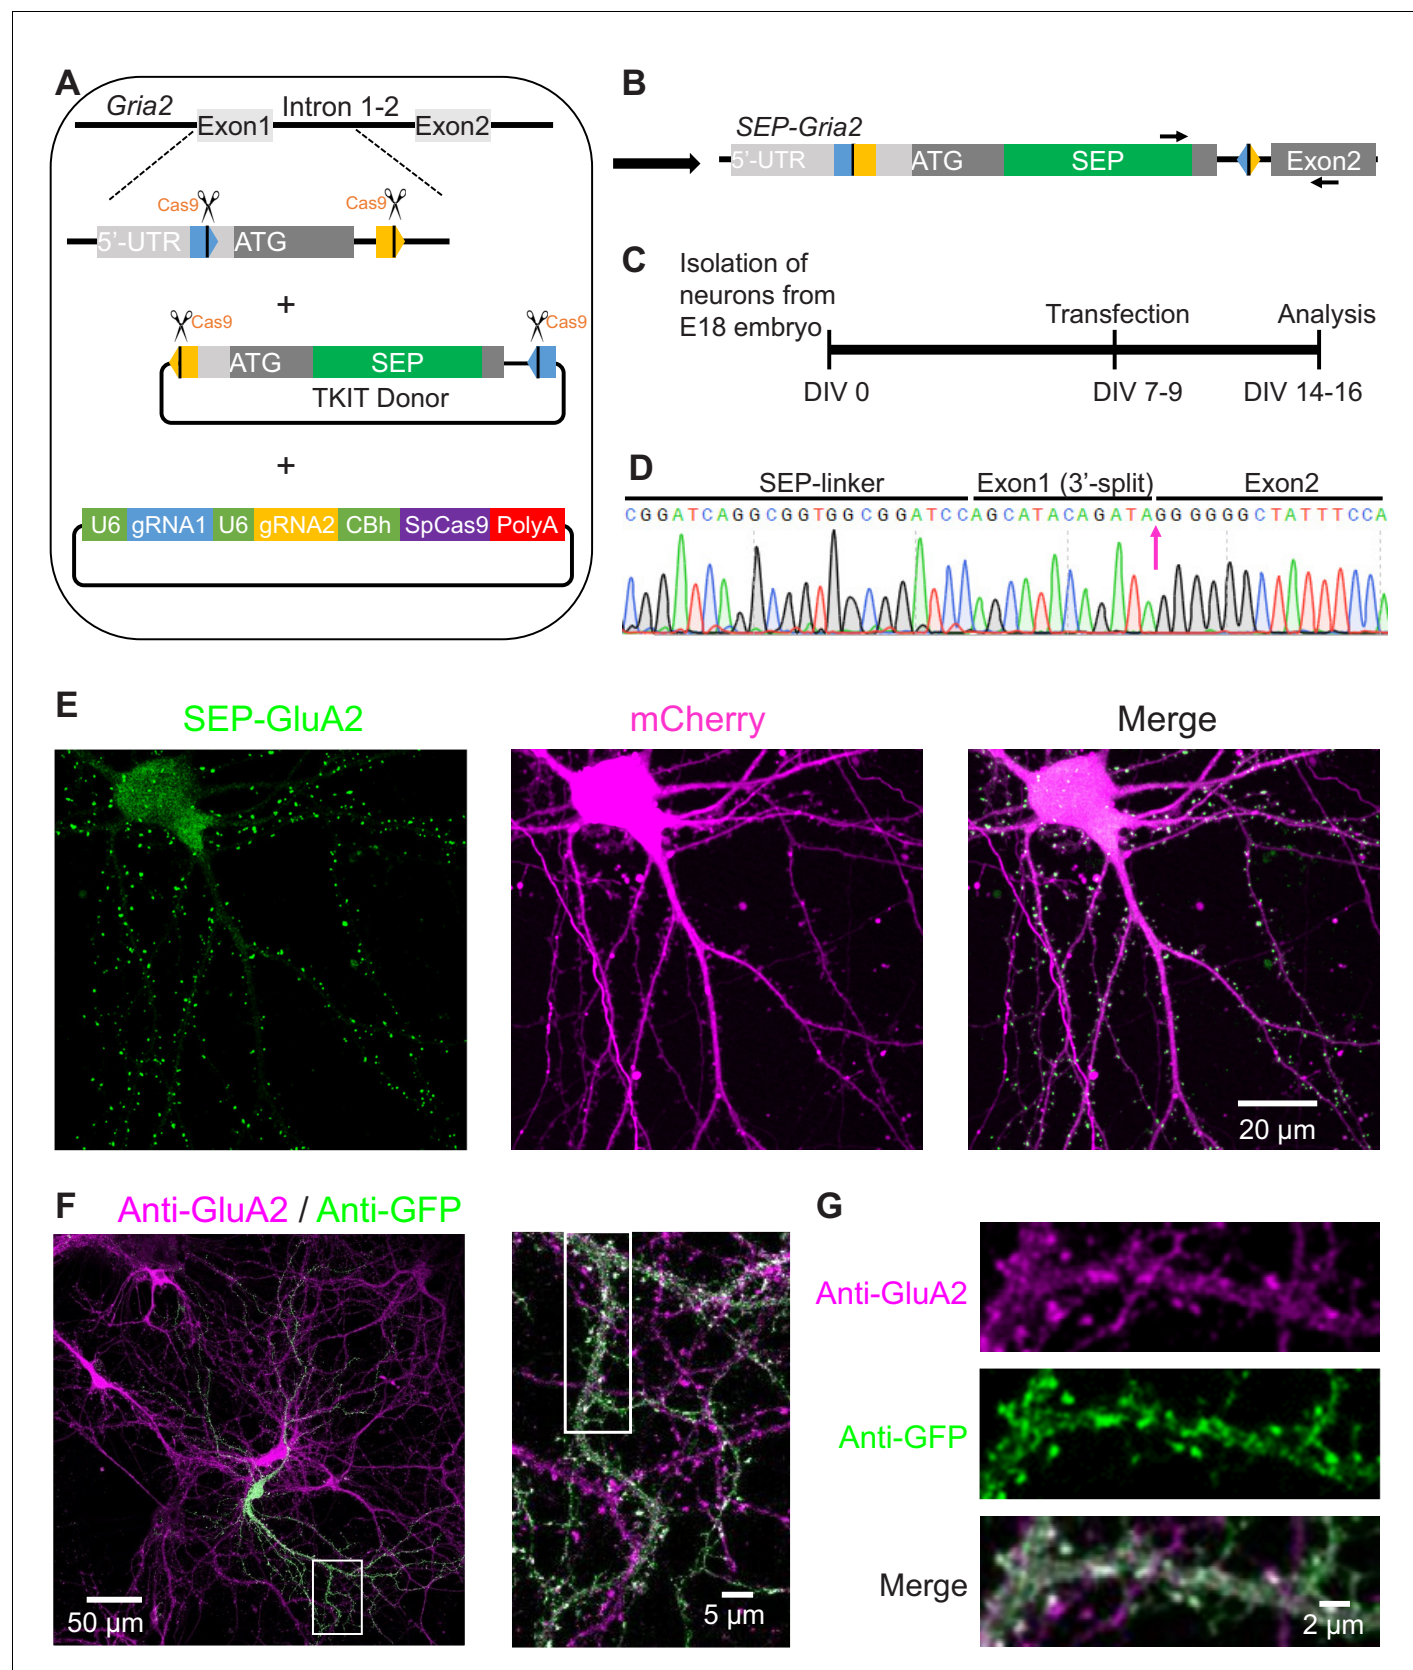

**Figure 1.** TKIT-mediated genome editing in neuron culture. (A) Graphical representation of the mouse genomic loci of *Gria2* and schematic of TKIT gene targeting. The blue and orange pentagons indicate gRNA target sequences. The black vertical line within pentagon indicates the Cas9 cleavage site. The TKIT Donor construct contains a 5'-UTR, ATG, SEP, and Exon2. (B) Schematic of the *SEP-Gria2* construct. The construct contains a 5'-UTR, ATG, SEP, and Exon2. (C) Isolation of neurons from E18 embryo. The timeline shows DIV 0 (Isolation), DIV 7-9 (Transfection), and DIV 14-16 (Analysis). (D) Sequencing chromatogram showing the SEP-linker, Exon1 (3'-split), and Exon2. The sequence is: C G G A T C A G G C G G T G G C G G A T C C A G C A T A C A G A T A G G G G G G C T A T T T C C A. A pink arrow indicates the cleavage site. (E) Fluorescence microscopy images showing *SEP-GluA2* (green), mCherry (magenta), and Merge. Scale bar: 20  $\mu$ m. (F) Fluorescence microscopy images showing Anti-GluA2 (magenta) and Anti-GFP (green). Scale bar: 50  $\mu$ m. Inset shows a higher magnification view with a 5  $\mu$ m scale bar. (G) Fluorescence microscopy images showing Anti-GluA2 (magenta), Anti-GFP (green), and Merge. Scale bar: 2  $\mu$ m.

*Figure 1 continued*

site. (B) Schematic of genomic DNA following SEP KI to *Gria2* with TKIT. Arrows indicate primers for RT-PCR and cDNA sequencing. (C) Experimental scheme for SEP KI in primary cultured neurons. (D) Sequence analysis of the cDNA from mRNA extracted from electroplated neuronal culture of SEP-GluA2. (E) Representative images showing the endogenous SEP signal in live neurons following TKIT-mediated SEP-GluA2 knock-in. Scale bar, 20  $\mu\text{m}$ . (F) Representative images of immunofluorescence showing that SEP-GluA2 (green) colocalized with GluA2 (magenta). Scale bars display 50 or 5  $\mu\text{m}$ . (G) Enlarged dendrite and spine (white boxes in right panel of F). Scale bars display 2  $\mu\text{m}$ .

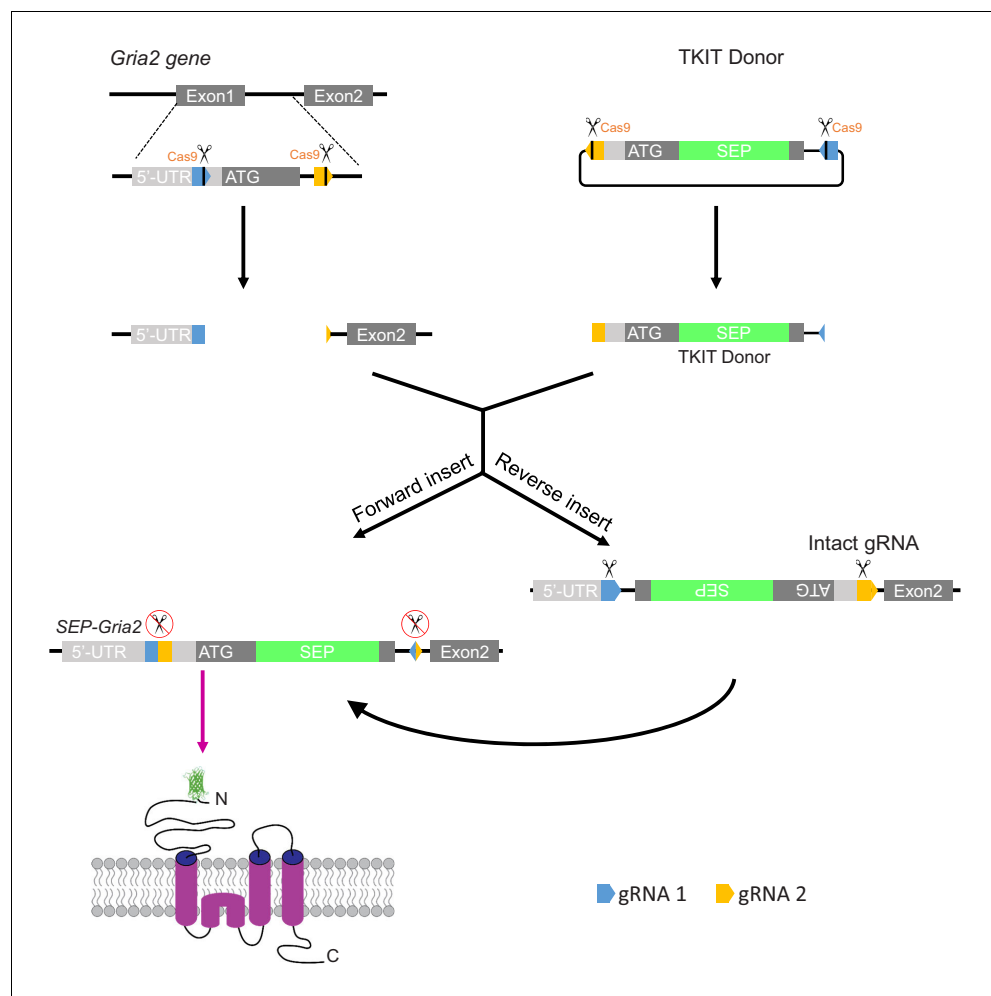

**Figure 1—figure supplement 1.** Strategy to promote donor DNA insertion in the correct orientation. Graphical representation of TKIT-mediated genome editing with *Streptococcus pyogenes* Cas9. The blue and orange pentagons indicate guide RNA 1 and guide RNA 2 recognition sites, respectively. The black line within the pentagon indicates the Cas9 cleavage site. The light gray rectangle indicates the 5-UTR of gene of interest and the dark gray rectangle the coding sequence. Black arrows indicate the possible outcomes following genomic insertion of the donor DNA.



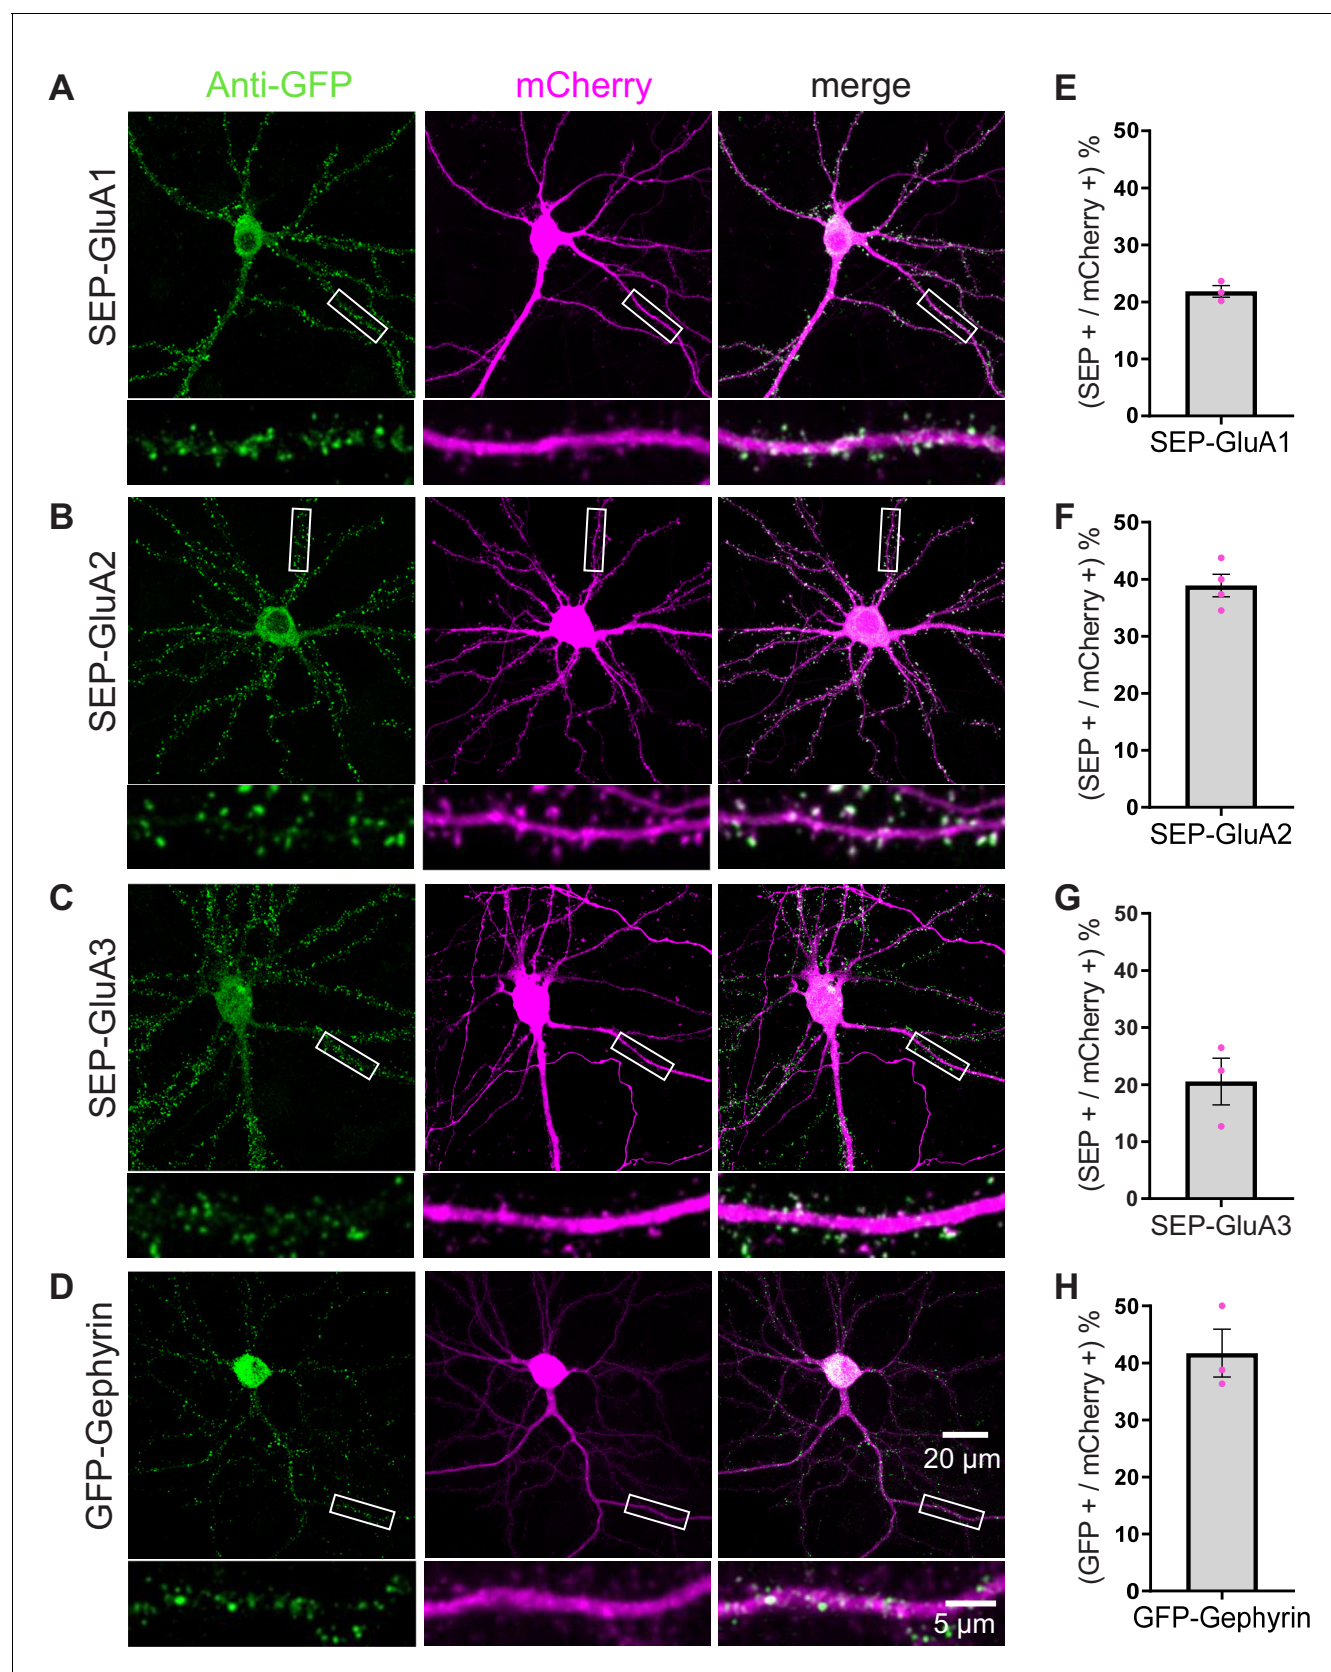

**Figure 2.** Efficient KI of SEP-GluA1-3 and GFP-gephyrin using TKIT. (A) SEP-GluA1, (B) SEP-GluA2, (C) SEP-GluA3, and (D) GFP-gephyrin visualized with confocal microscopy after neurons were co-transfected with TKIT constructs and a mCherry cell fill. Segments of dendrite in the white boxed region are

Figure 2 continued on next page

Figure 2 continued

enlarged below. Scale bar, 20  $\mu\text{m}$  or 5  $\mu\text{m}$ . Average efficiency of KI for (E) SEP-GluA1, (F) SEP-GluA2, (G) SEP-GluA3, and (H) GFP-gephyrin. Error bars display SEM.

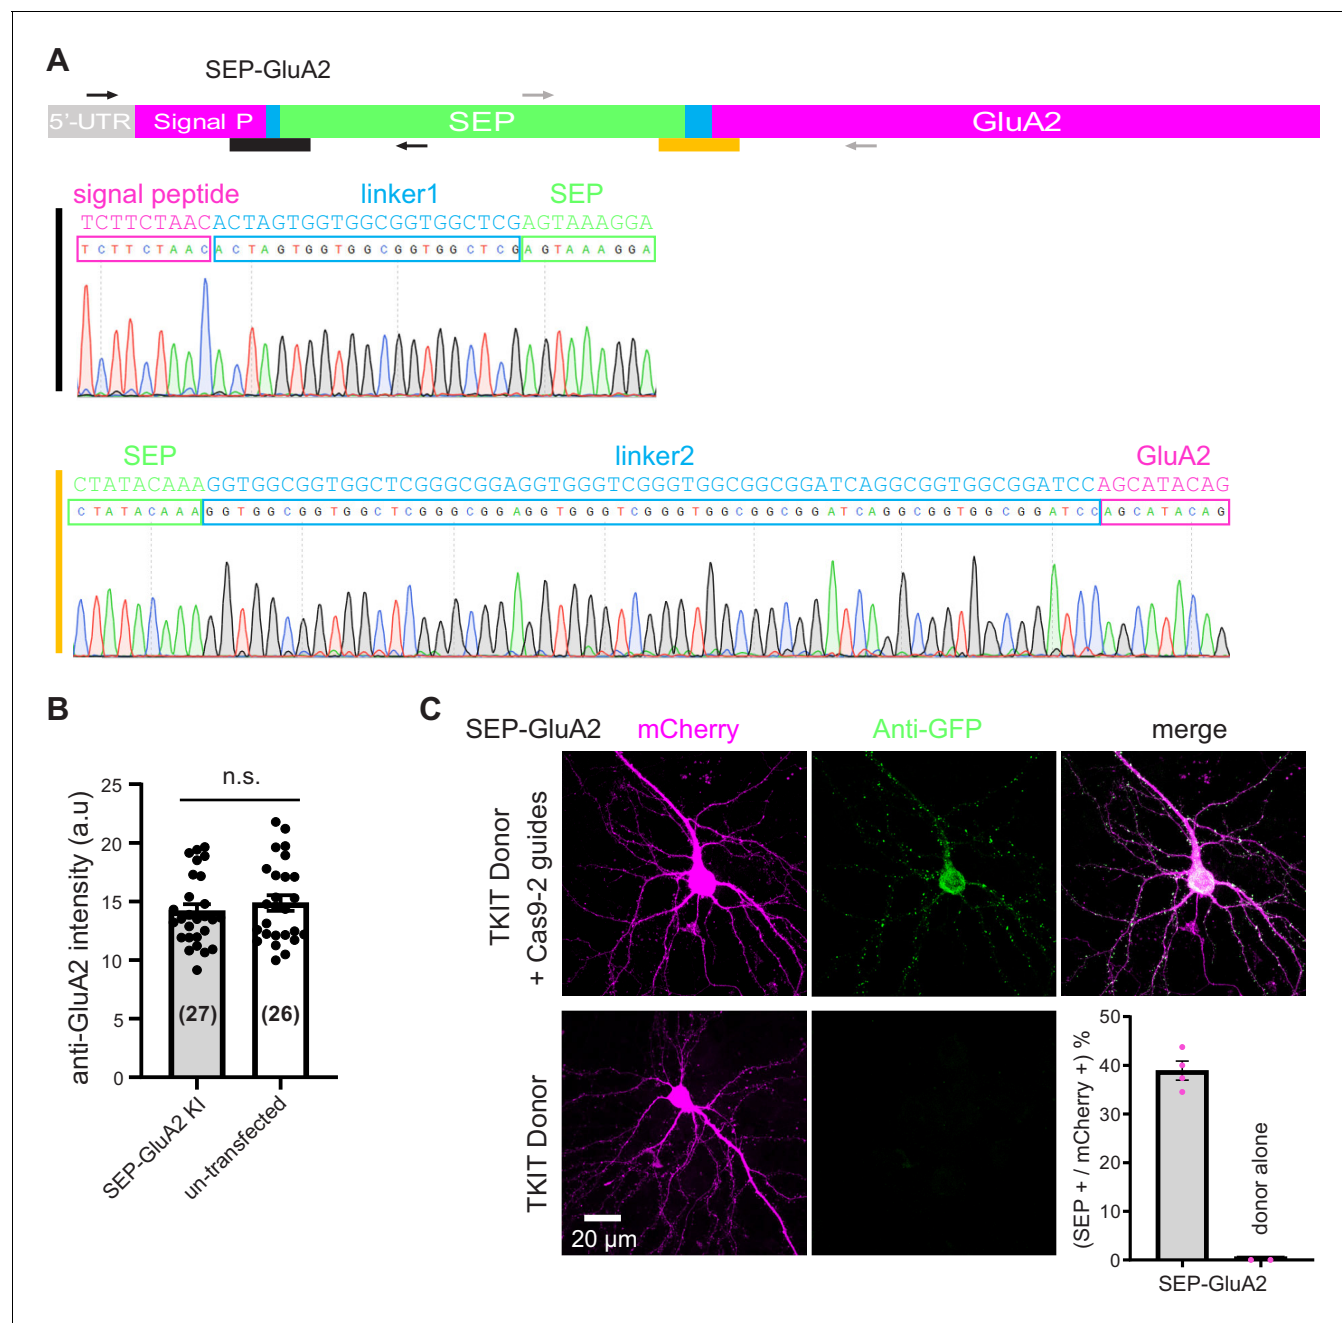

**Figure 2—figure supplement 1.** Correct splicing of SEP-GluA2 and comparable GluA2 levels in KI and WT surrounding neurons. **(A)** Sequence analysis of cDNA reverse-transcribed from mRNA extracted from neuronal cultures electroporated with TKIT SEP-GluA2 constructs. The black line indicates the junction between the signal peptide and linker1-SEP and the orange line indicates the junction between SEP-linker2 and the mature protein. The magenta region indicates the endogenous protein sequence, the green sequence indicates SEP and the blue sequence indicates linkers. Black and gray arrows indicate the location of PCR primer pairs. **(B)** Quantification of synaptic GluA2 levels with immunofluorescence. GluA2 levels in SEP-GluA2 KI neurons are comparable with non-transfected (WT) neurons (data from 27 SEP-GluA2 KI neurons and 26 surrounding non-transfected neurons). Data presented as mean  $\pm$  SEM. Individual data points are shown as black dots. Unpaired Student's t-test for comparison ( $p=0.4495$ ). **(C)** Transfection of TKIT donor alone does not produce KI. Representative images showing TKIT of SEP-GluA2 KI compared to TKIT donor-only control. Average efficiency of KI for SEP-GluA2 compared to donor-only control (bottom right corner). Scale bar indicates 20  $\mu$ m.

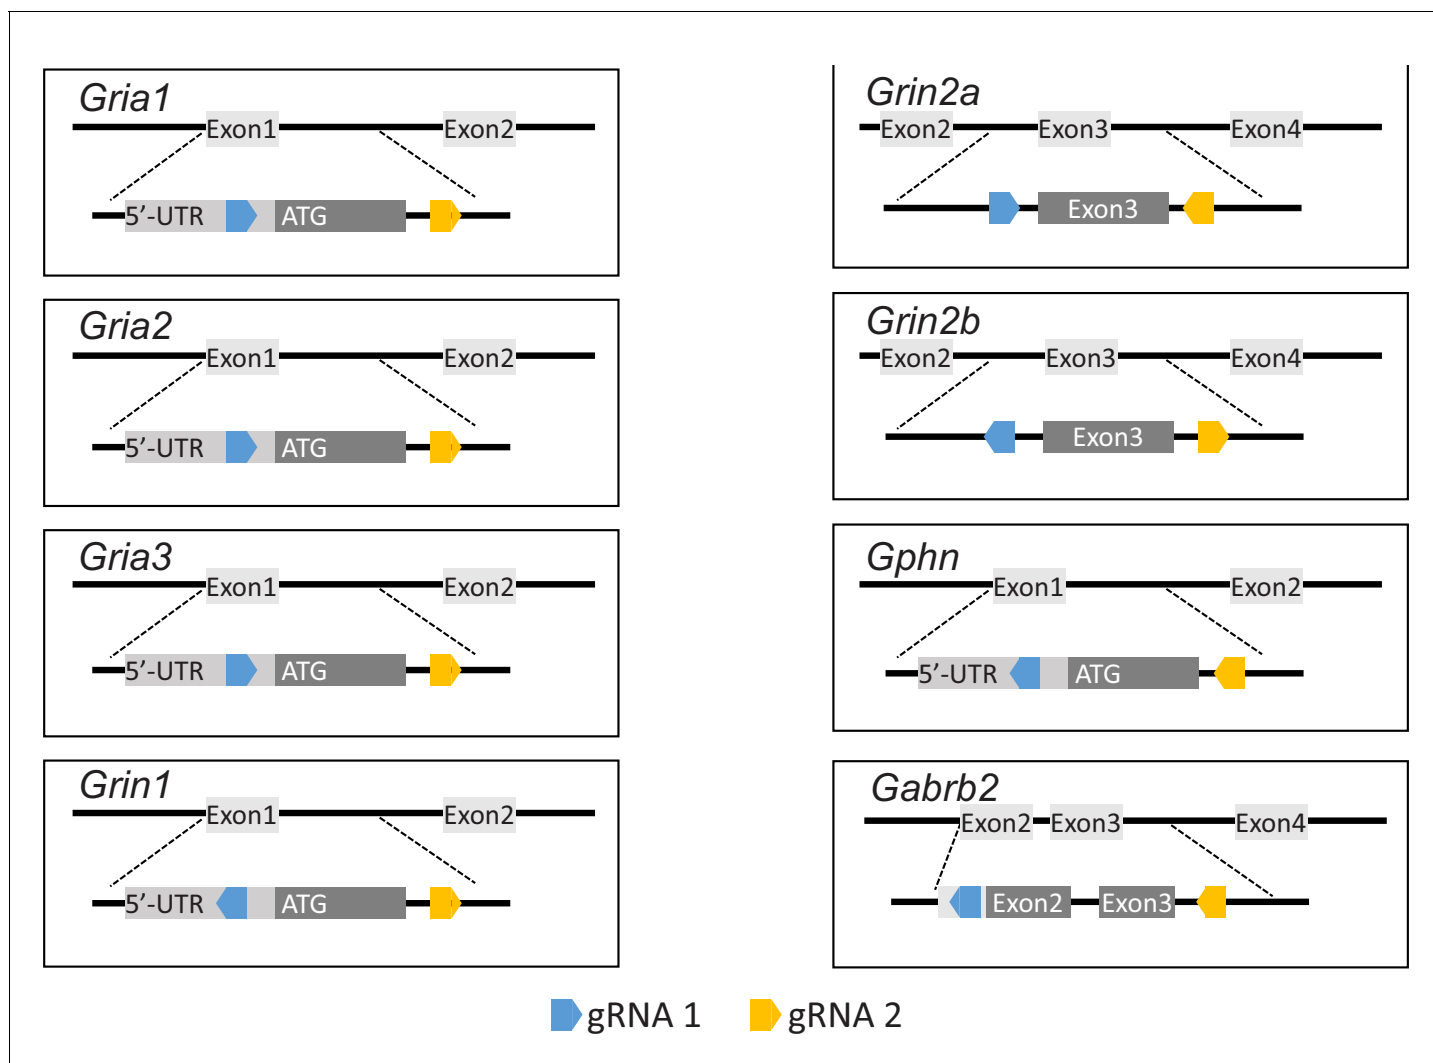

**Figure 2—figure supplement 2.** Location of TKIT guide pairs. Schematic illustrating the location of all guide RNAs and their orientation in all genes targeted for TKIT. In each panel the top portion indicates the partial exons and introns being targeted. The bottom part shows an enlargement of the region to be edited. The light gray rectangle indicates the 5'-UTR. The dark gray rectangle indicates the coding sequence. The blue and orange pentagons indicate guide RNA (gRNA) 1 and 2, respectively. The genes *Gria1*, *Gria2*, *Gria3*, *Grin1*, *Grin2a*, *Grin2b*, *Gphn*, and *Gabrb2* encode for GluA1, GluA2, GluA3, NR1, NR2A, NR2B, Gephyrin, and GABA<sub>A</sub>R Beta-2, respectively.

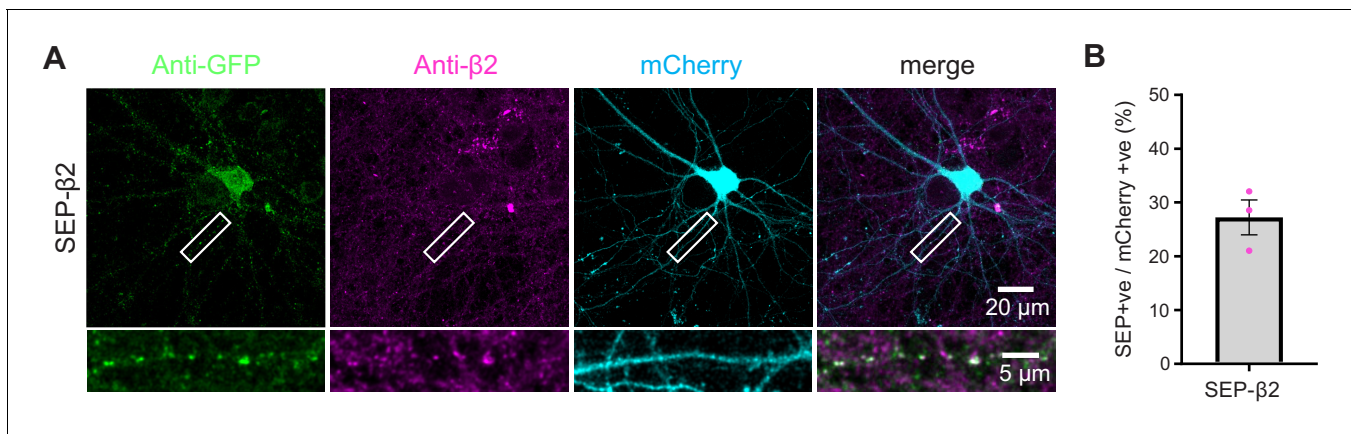

**Figure 2—figure supplement 3.** TKIT of SEP-GABA<sub>A</sub> β2. (A) Representative immunofluorescent images demonstrating TKIT of SEP-GABA<sub>A</sub> β2 (SEP-β2). The dendritic region within the white box is enlarged below to better illustrate co-localization between SEP-β2 (green) and anti-β2 signal (magenta). Note: the cell-fill channel was removed from the enlarged overlay images for clarity. Scale bars display 20 μm or 5 μm. (B) Average efficiency of SEP-β2 KI was 27.22 ± 3.24%. Data presented as mean ± SEM.



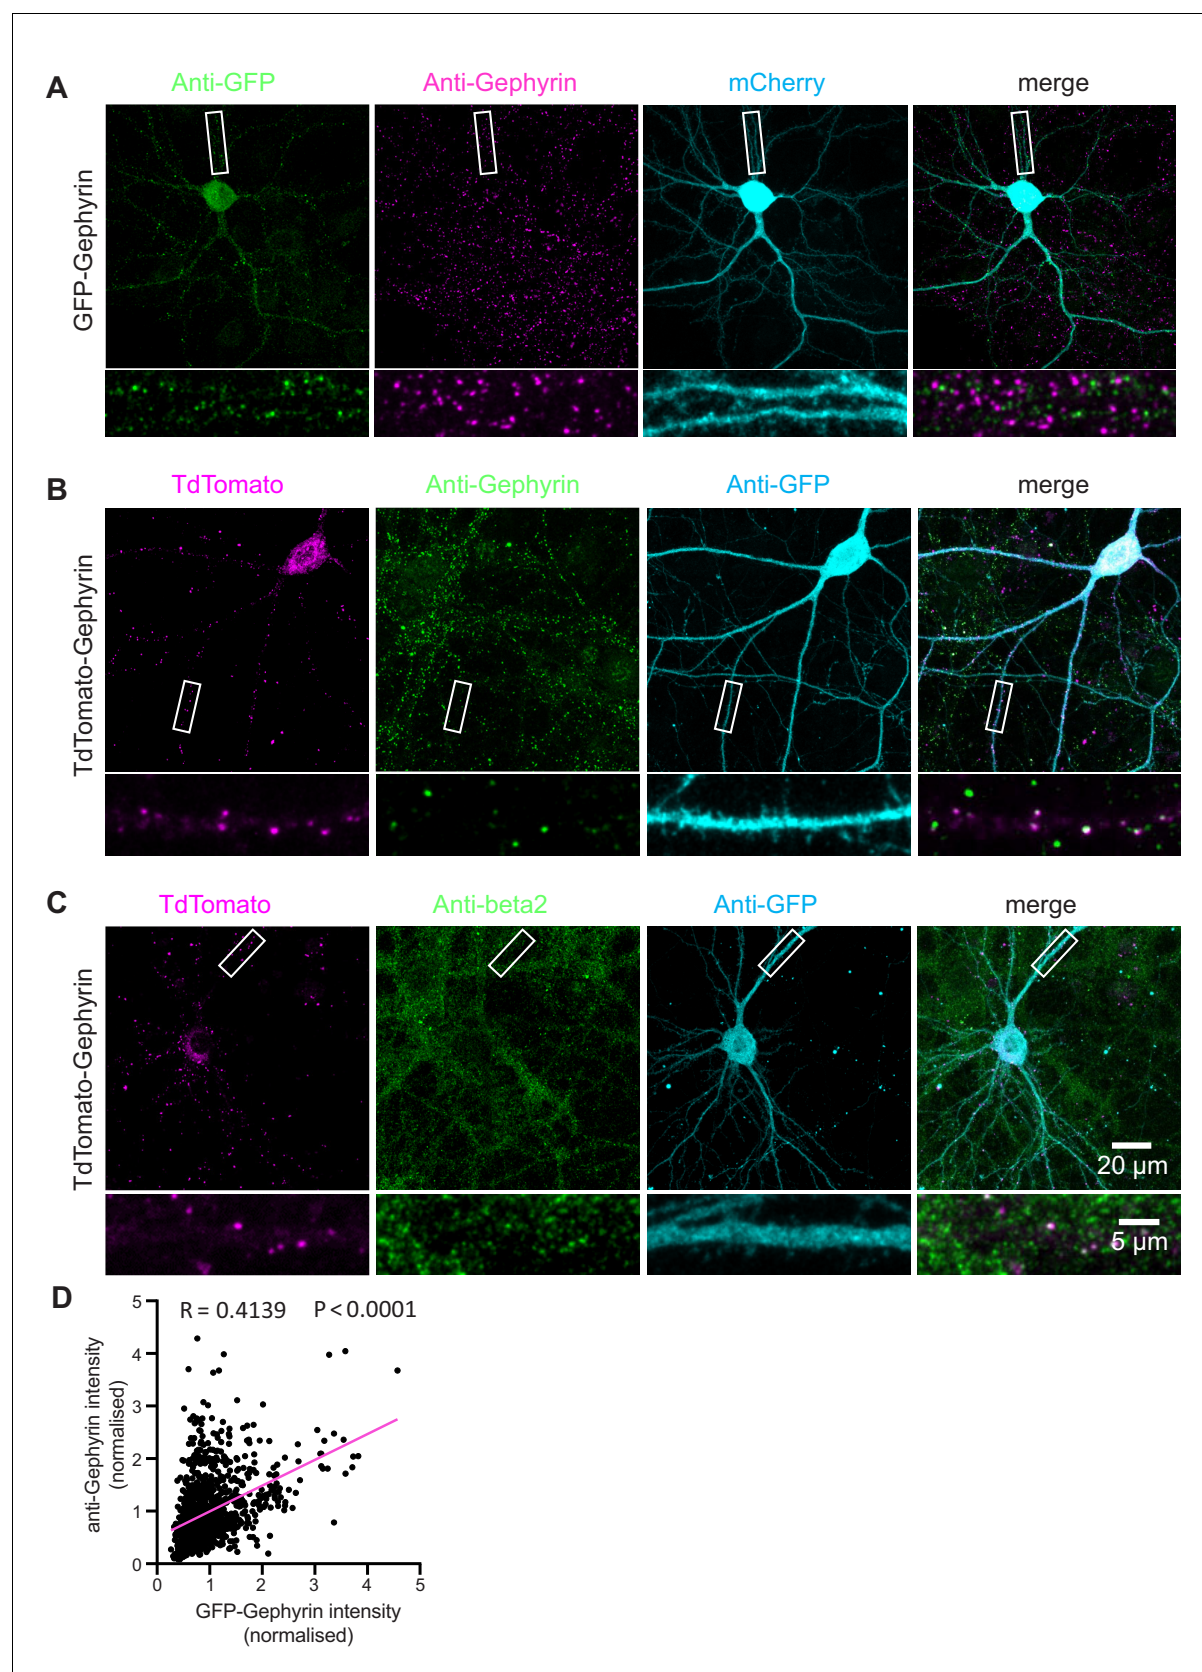

**Figure 2—figure supplement 4.** TKIT of GFP-Gephyrin and tdTomato-Gephyrin. (A) Representative immunofluorescent images demonstrating TKIT of GFP-Gephyrin. The dendritic region within the white box is enlarged below to better illustrate co-localization between GFP-Gephyrin (green) and anti-Gephyrin (magenta). *Figure 2—figure supplement 4 continued on next page*

*Figure 2—figure supplement 4 continued*

Gephyrin signal (magenta). **(B)** Representative immunofluorescent images demonstrating TKIT of tdTomato-Gephyrin. The dendritic region within the white box is enlarged below to better illustrate co-localization between tdTomato-Gephyrin (magenta) and anti-Gephyrin signal (green). **(C)** Representative immunofluorescent images demonstrating TKIT of tdTomato-Gephyrin. The dendritic region within the white box is enlarged below to better illustrate co-localization between tdTomato-Gephyrin (magenta) and the  $\beta 2$  GABA<sub>A</sub> receptor subunit (green). Note: the cell-fill channel was removed from the enlarged overlay images for clarity. Scale bars display 20  $\mu\text{m}$  or 5  $\mu\text{m}$ . **(D)** Scatter plot showing the correlation between GFP-Gephyrin (from KI) and anti-Gephyrin staining intensity (from immunofluorescence). Correlation (slope) between GFP and anti-Gephyrin fluorescent intensity was calculated by Simple Linear Regression (GraphPad Prism 7 or 8). Data from 20 neurons and 1007 GFP-Gephyrin puncta.

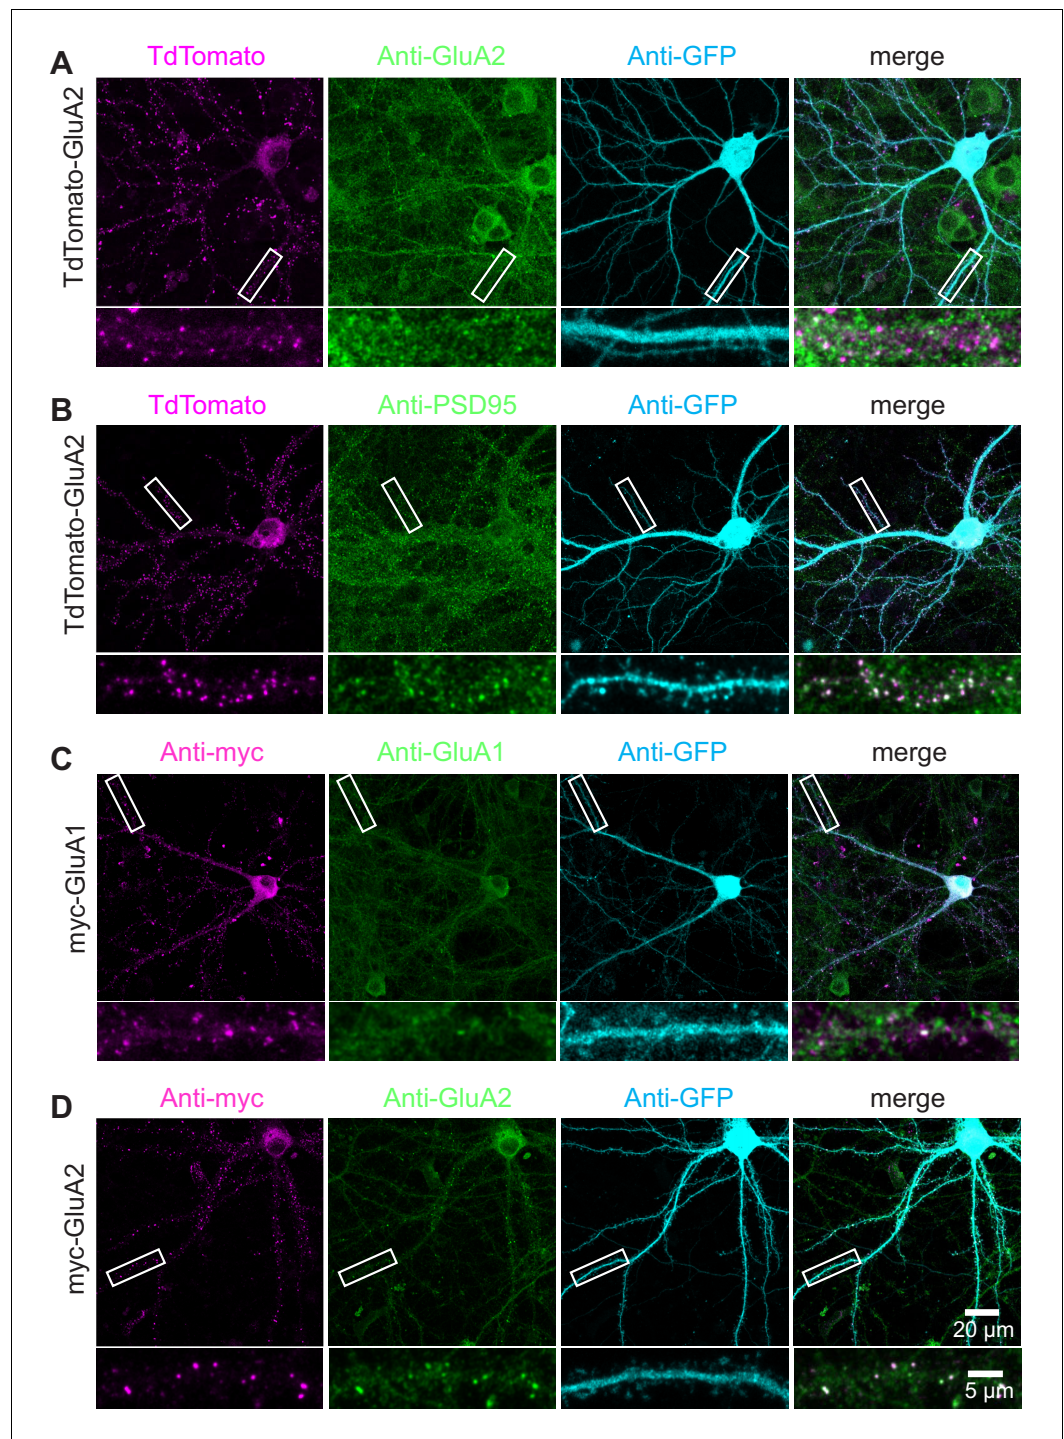

**Figure 2—figure supplement 5.** TKIT of alternative tags for AMPA receptors. (A and B) Representative immunofluorescent images demonstrating TKIT of tdTomato-GluA2. The dendritic region within the white box is enlarged below to better illustrate co-localization between tdTomato-GluA2 (magenta) and GluA2 (green, A) or PSD95 (green, B). (C and D) Representative immunofluorescent images demonstrating TKIT of myc-GluA1 and myc-GluA2. The dendritic region within the white box is enlarged below to better illustrate co-localization between myc-GluA1 and myc-GluA2 (magenta) with GluA1 and GluA2 (green), respectively. Note: The cell-fill channel was removed from the enlarged merged images for clarity. Scale bars display 20  $\mu\text{m}$  or 5  $\mu\text{m}$ .



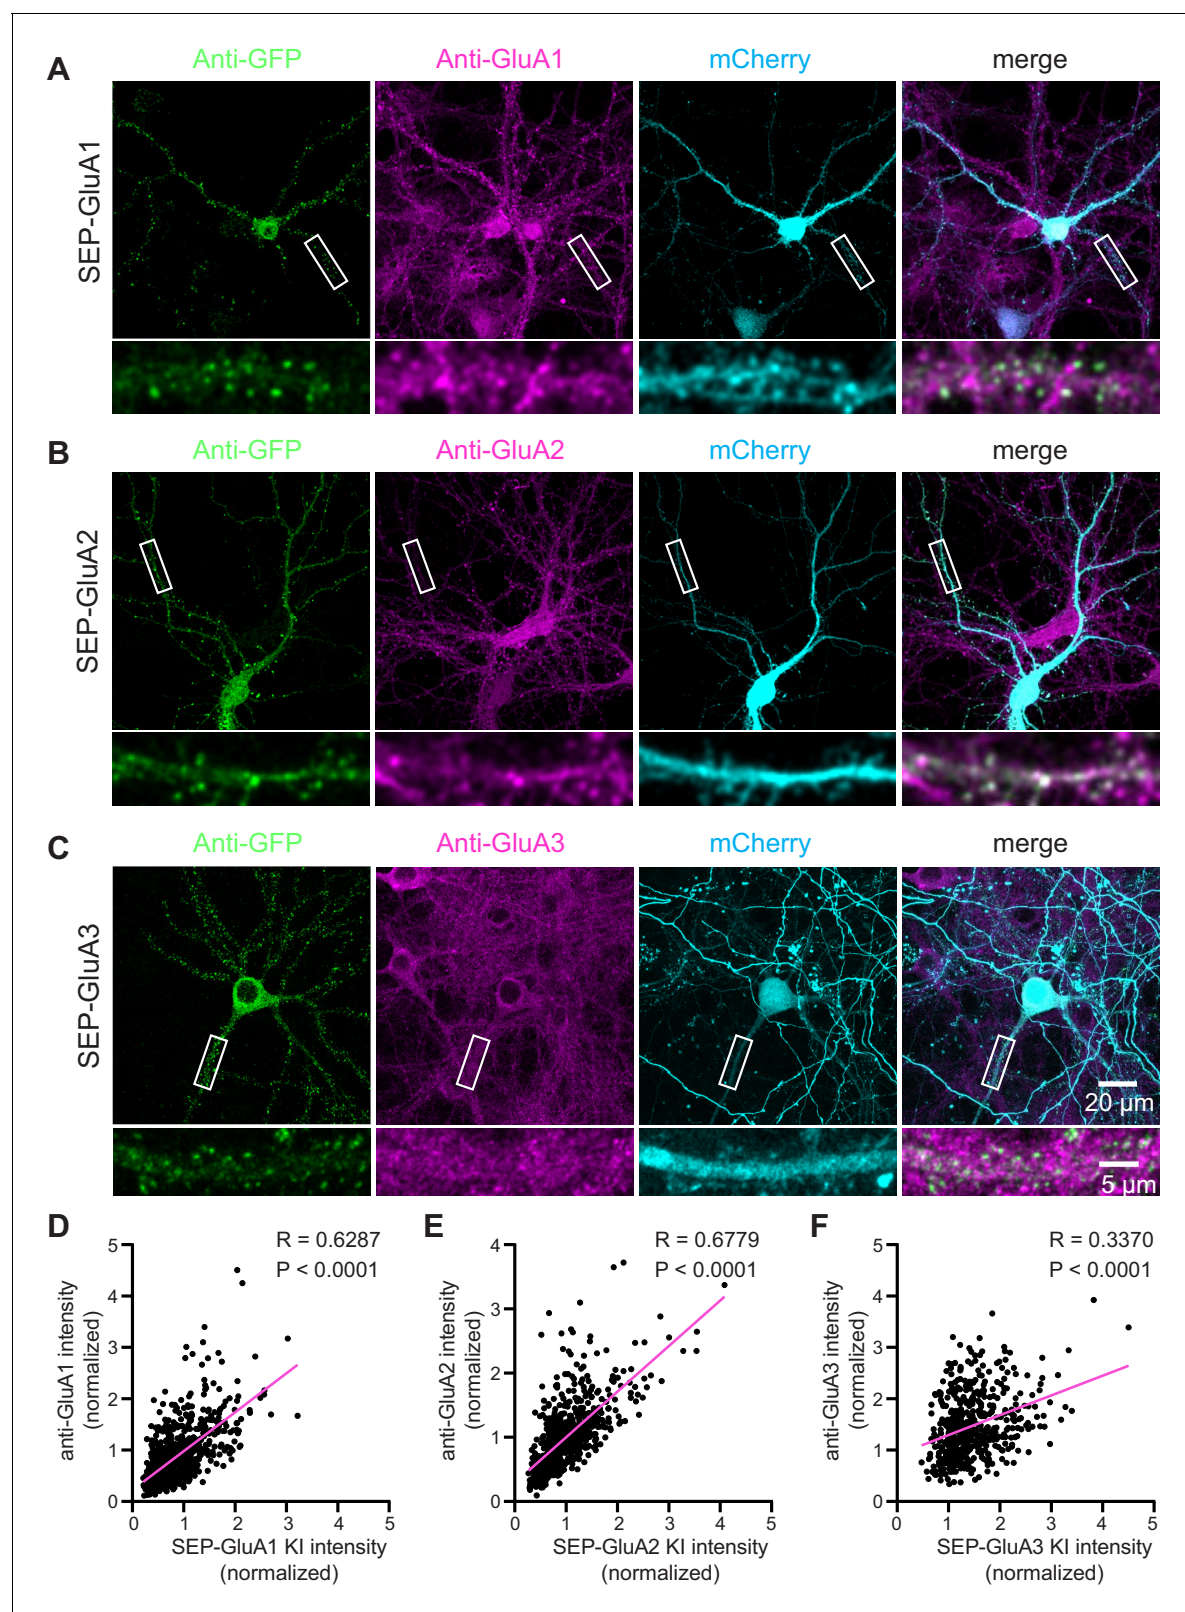

**Figure 2—figure supplement 6.** Correlation of SEP-GluA1-3 KI with endogenous AMPA receptors. (A–C) Representative immunofluorescent images showing TKIT of SEP-GluA1 (A), SEP-GluA2 (B), and SEP-GluA3 (C). The dendritic region within the white box is enlarged below to better illustrate co-localization between SEP-GluA1 (green) and GluA1 (magenta, A), SEP-GluA2 (green) and GluA2 (magenta, B), and SEP-GluA3 (green) and GluA3 (magenta, C). Note: The cell-fill channel was removed from the enlarged overlay images for clarity. Scale bars display 20  $\mu\text{m}$  or 5  $\mu\text{m}$ . (D–F) Scatter plots

Figure 2—figure supplement 6 continued on next page

Figure 2—figure supplement 6 continued

showing the correlation between SEP-GluA1-3 and anti-GluA1-3 immunofluorescence intensity. Correlation (slope) between SEP and anti-GluA fluorescent intensity was calculated by Simple Linear Regression (GraphPad Prism 7 or 8). Data from 14 neurons and 733 synapses for SEP-GluA1, 13 neurons and 668 synapses for SEP-GluA2, and 10 neurons and 508 synapses for SEP-GluA3.

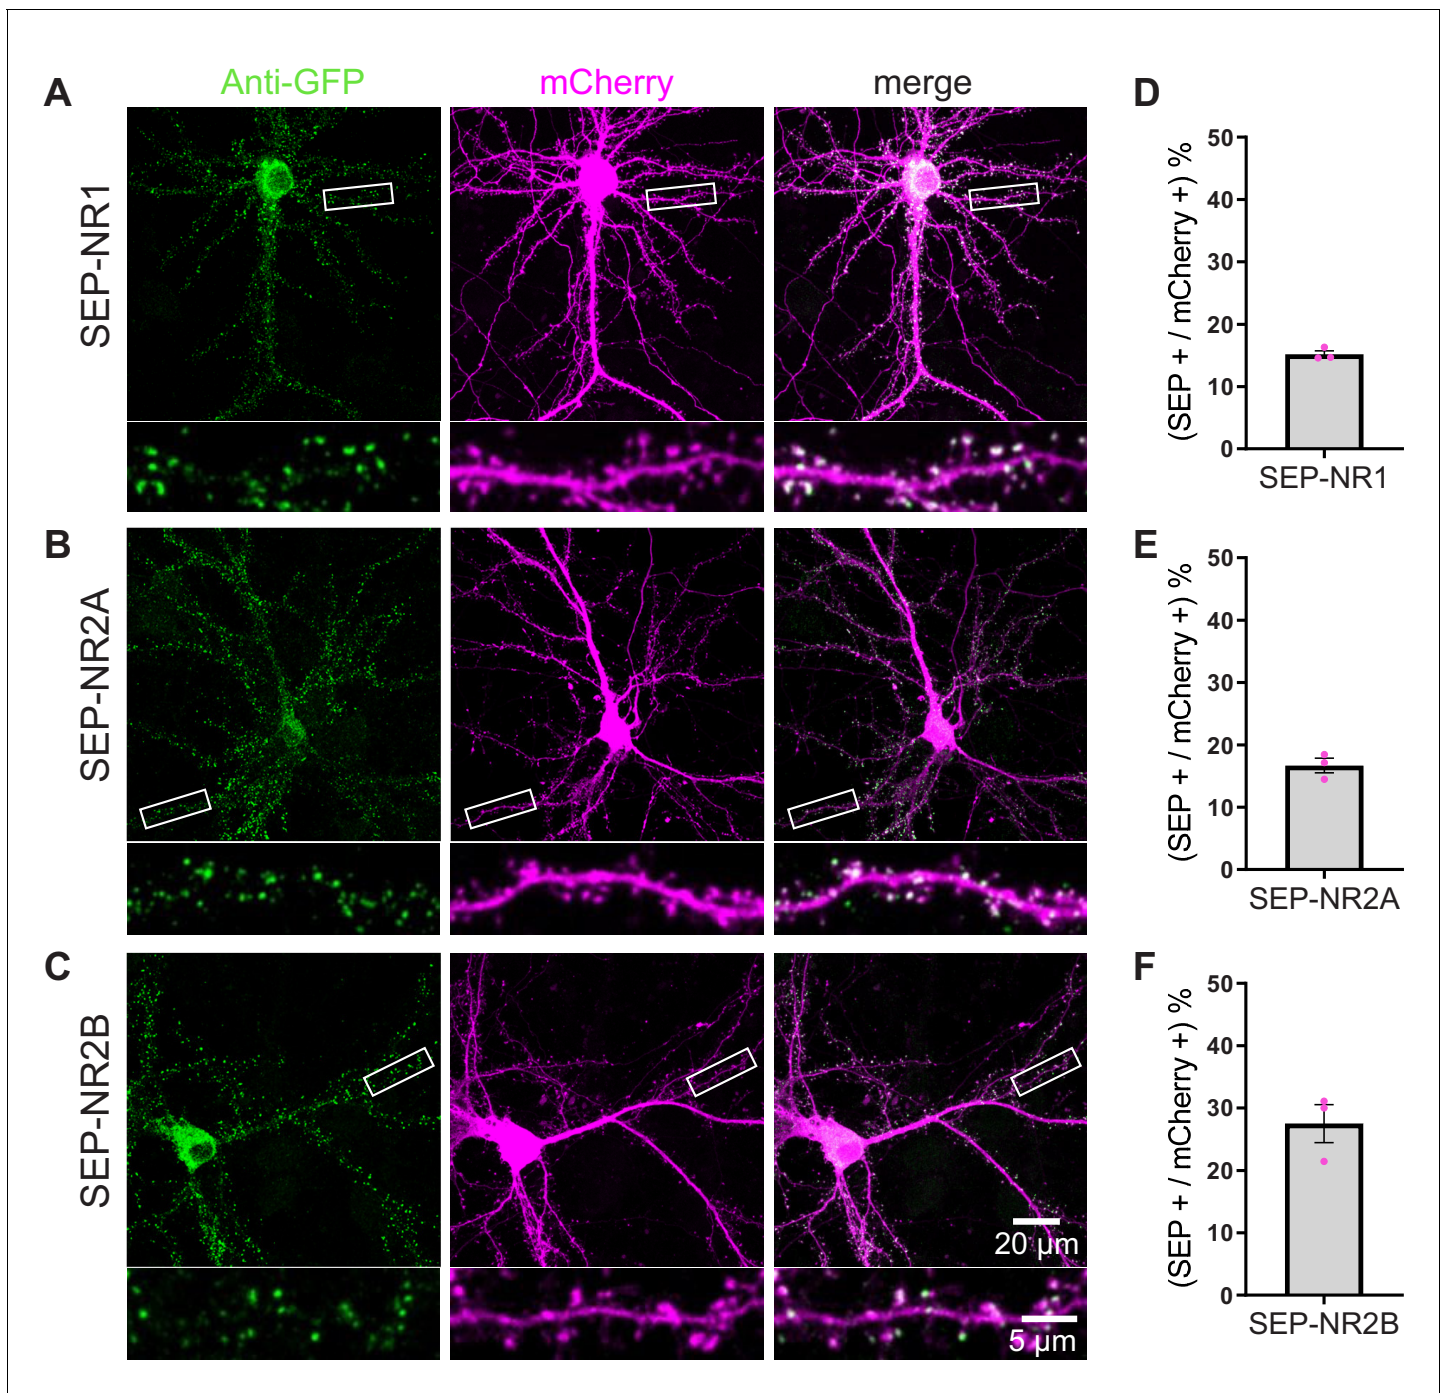

**Figure 3.** TKIT of SEP NMDA receptor subunits. (A) SEP-NR1, (B) SEP-NR2A, and (C) SEP-NR2B KI were visualized with confocal microscopy after neurons were co-transfected with TKIT constructs and a mCherry cell fill. Segments of dendrite in the white boxed region are enlarged below. Scale bar, 20  $\mu$ m or 5  $\mu$ m. Average efficiency of KI for (D) SEP-NR1, (E) SEP-NR2A, and (F) SEP-NR2B. Error bars display SEM.



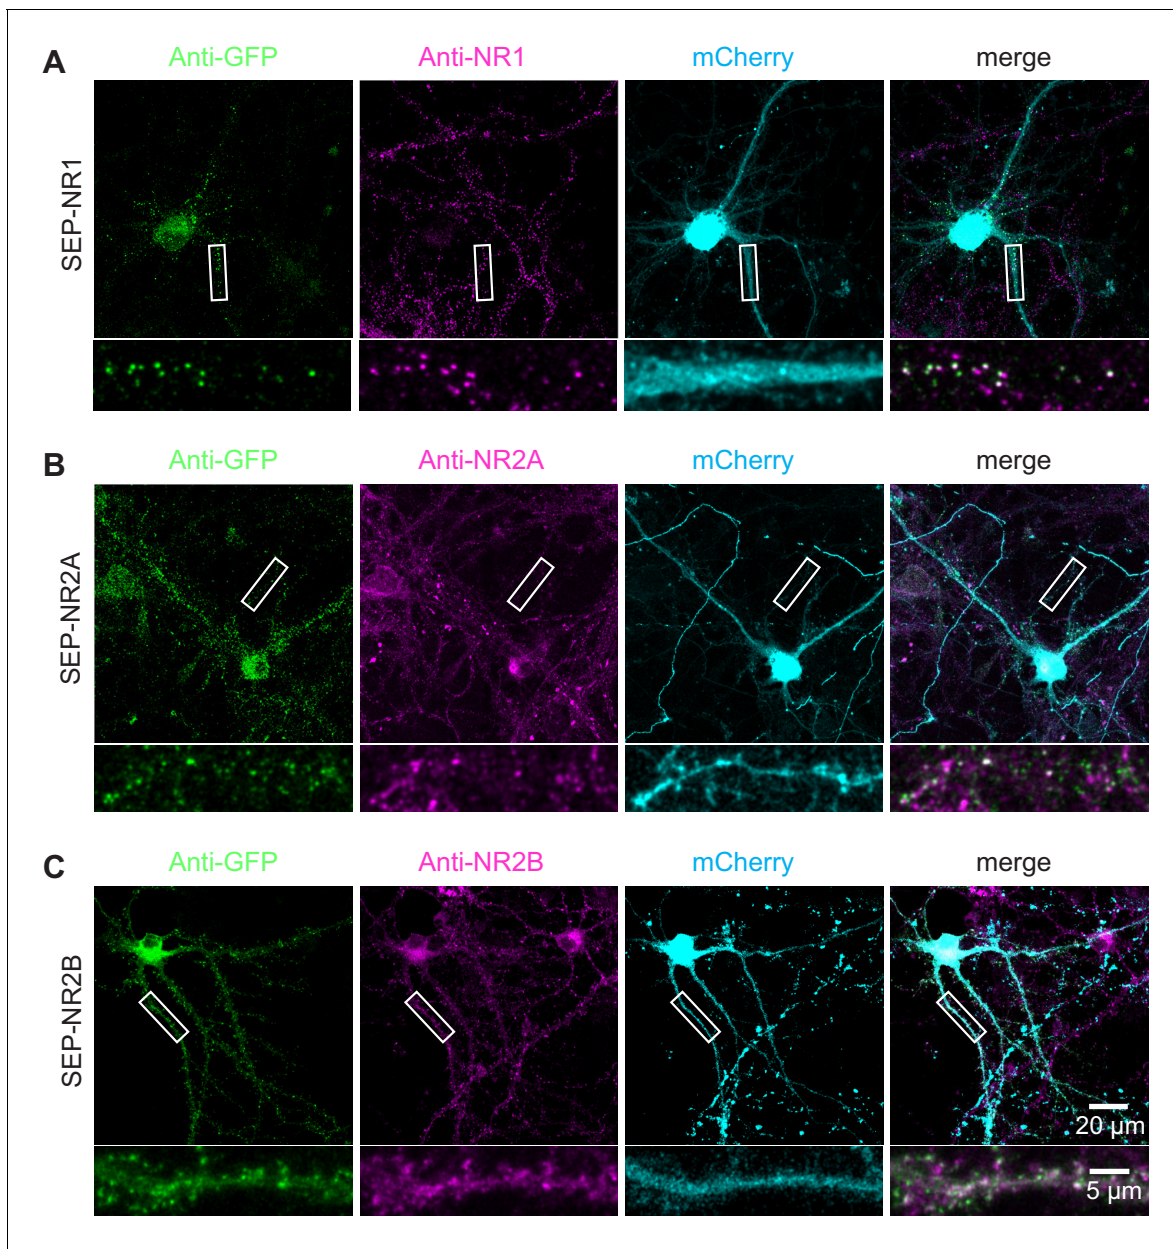

**Figure 3—figure supplement 1.** TKIT of SEP-NMDA receptors. Representative immunofluorescent images demonstrating TKIT of SEP-NR1 (A), SEP-NR2A (B), and SEP-NR2B (C). The dendritic region within the white box is enlarged below to better illustrate co-localization between SEP-NR1 (green) and anti-NR1 (magenta, A), SEP-NR2A (green), and anti-NR2A (magenta, B), and SEP-NR2B (green) and anti-NR2B (magenta, C). Note: The cell-fill channel was removed from the enlarged overlay images for clarity. Scale bars display 20  $\mu\text{m}$  or 5  $\mu\text{m}$ .

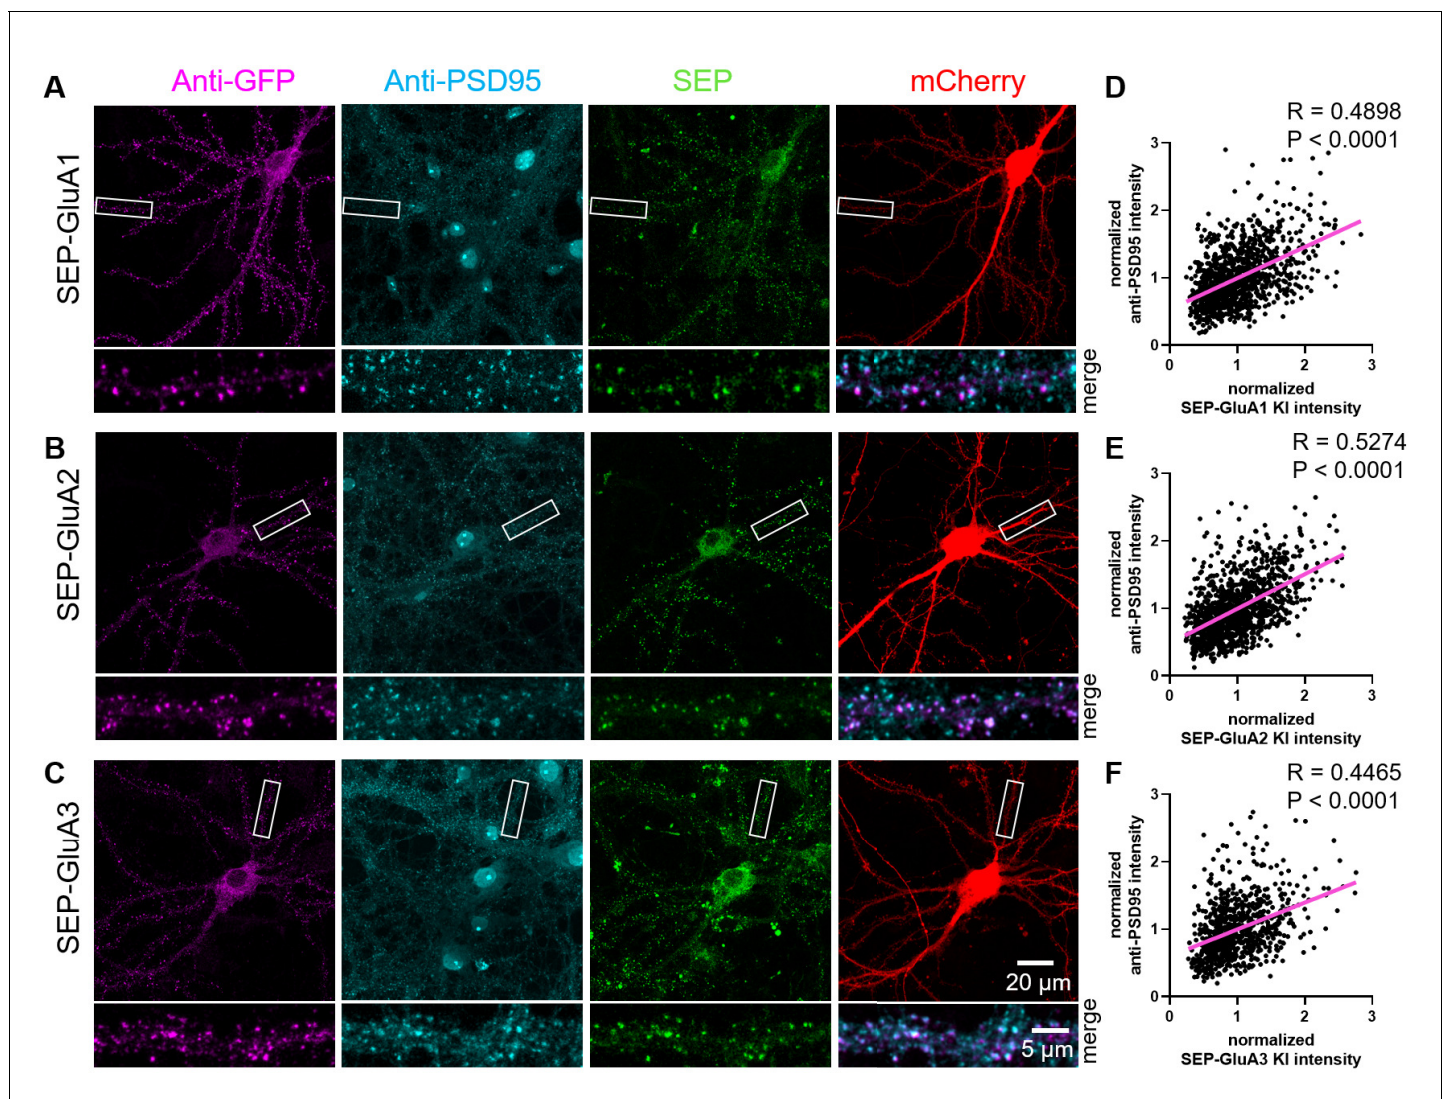

**Figure 4.** Validation of synaptic localization following SEP KI to AMPARs. TK1 of (A) SEP-GluA1, (B) SEP-GluA2, and (C) SEP-GluA3 with endogenous SEP signal (green), PSD95 staining (cyan), GFP staining (magenta), and mCherry cell fill (red). Segments of dendrite in the white boxed region are enlarged below. Note: the endogenous SEP signal and cell-fill channel (mCherry) were removed from the enlarged overlay images for clarity. Scale bars display 20 or 5  $\mu$ m. (D–F) Scatter plots showing the correlation between SEP-GluA1–3 signal and PSD95 immunofluorescence signal. Correlation (slope) between SEP and anti-PSD95 fluorescent intensity was calculated by Simple Linear Regression (GraphPad Prism 7 or 8). (D) SEP-GluA1 correlations with data from 22 neurons and 1114 synapses, (E) SEP-GluA2 correlations with data from 23 neurons and 1191 synapses, and (F) SEP-GluA3 correlations with data from 16 neurons and 810 synapses.

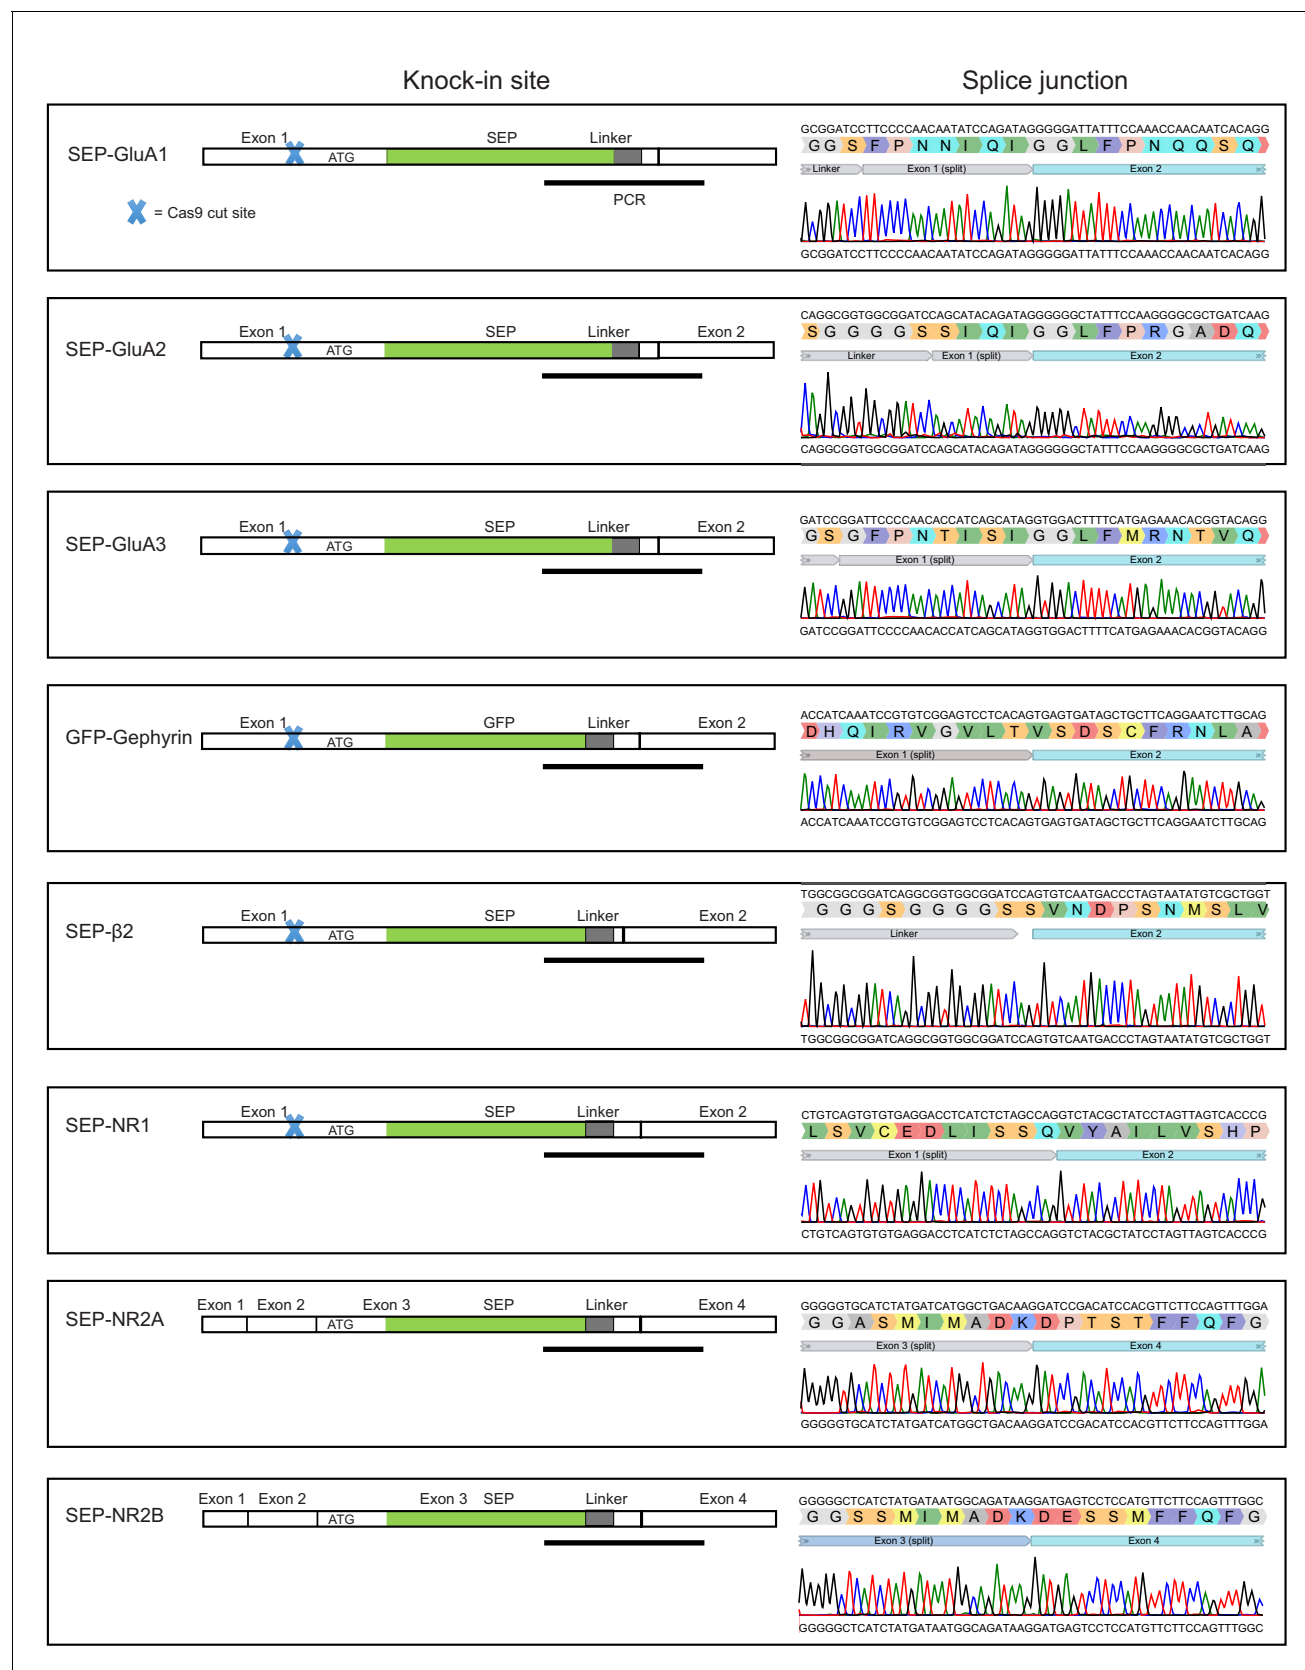

**Figure 4—figure supplement 1.** Intact splicing with TKIT. Schematic of cDNAs indicating the KI site and neighboring exons for each SEP/GFP TKIT target. The blue cross indicates DNA cut sites. Sanger sequencing was used to analyze cDNA reverse-transcribed from mRNA extracted from neuronal

Figure 4—figure supplement 1 continued on next page

*Figure 4—figure supplement 1 continued*

cultures electroporated with each SEP/GFP TKIT target. Sequencing results indicate intact splicing of tagged proteins. The black line under the schematic indicate the region PCR amplified and sequenced. Note: The downstream cut site for SEP-GluA1, SEP-GluA2, SEP-GluA3, GFP-Gephyrin, SEP- $\beta$ 2, and SEP-NR1 is located within introns and therefore is not indicated within the schematic. Both cut sites for SEP-NR2A and SEP-NR2B are located within introns.



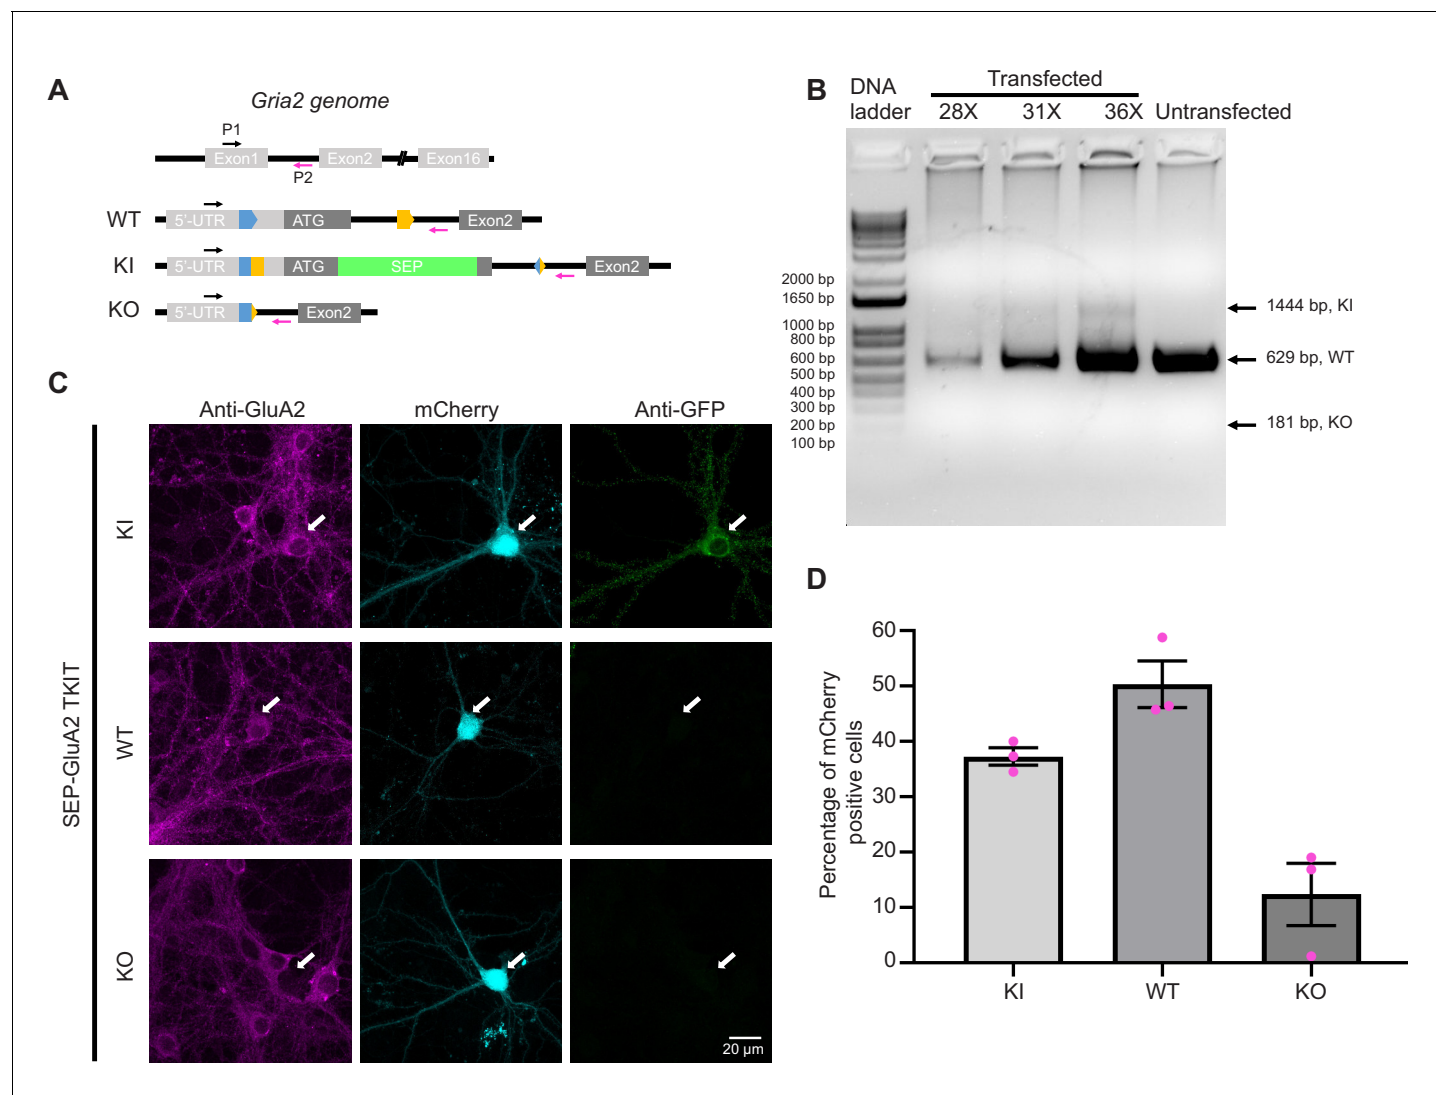

**Figure 4—figure supplement 2.** Low levels of GluA2 KO with TKIT. (A) Top panel: cartoon showing *Gria2* gene structure and the location of PCR primers (upstream P1, black arrow and downstream P2, magenta arrow). Bottom panel: three predicted genotypes (WT, KI, and KO). Arrows indicate the same primers showed in top panel. (B) Genomic DNA was extracted from neuronal cultures following electroporation of TKIT constructs. PCR was performed with one pair of PCR primers to detect KI/WT/KO outcomes with different numbers of cycles (28, 31, and 36). Following DNA electrophoresis of PCR products, there was clear KI and WT bands, and no detectable KO band. Note: proportion of WT was overestimated, because part of WT was from non-transfected cells. (C) Representative immunofluorescent images of TKIT mediated SEP-GluA2 KI, including KI, WT, and KO neurons. White arrows indicate transfected neurons. Scale bars represent 20  $\mu$ m. (D) Quantification of different fractions of KI, WT, or KO cells based on data from 252 neurons (three experiments) following SEP-GluA2 TKIT mediated KI. Mean of KI: 37.3%, WT: 50.3%, KO: 12.4%. Results shown as mean  $\pm$  SEM.



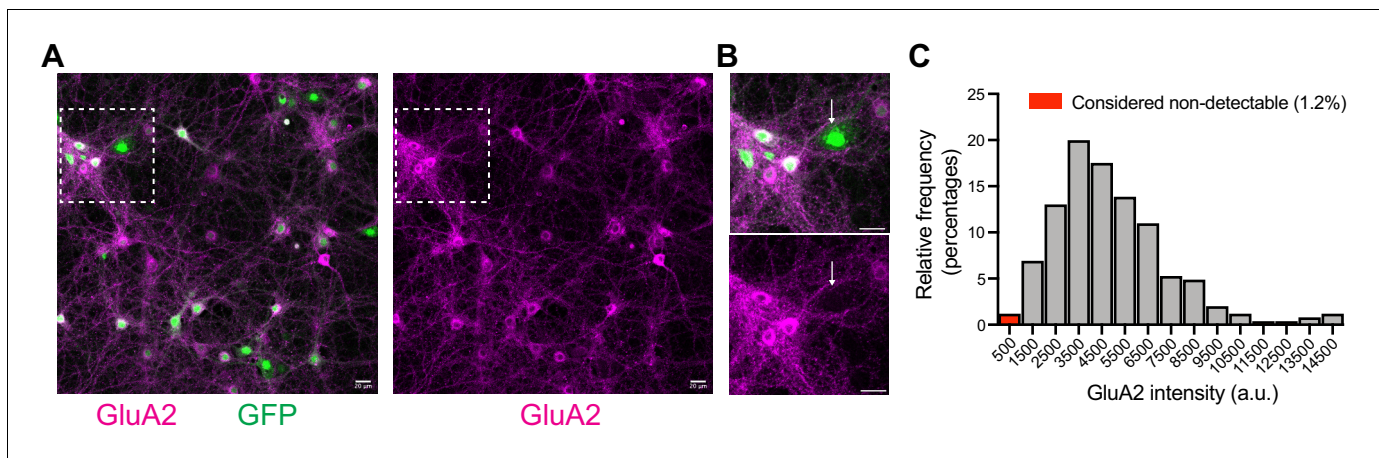

**Figure 4—figure supplement 3.** Occasional detection of GluA2-lacking neurons in the absence of TKIT construct transfection. **(A)** Representative images of mouse cortical neurons at DIV15. Cells were transduced with AAV-GFP at DIV2, to serve as a morphology marker. Immunofluorescence for GluA2 was performed to assess the level of GluA2 expression. **(B)** Enlargement of white boxed region showing GFP (green) and GluA2 (magenta). The white arrow indicates an example of a cell lacking detectable levels of GluA2. **(C)** GluA2 levels were quantified at the cell body of 245 neurons, from three coverslips. We considered cells with levels of GluA2 lower than 1000 (a.u.) to be GluA2 lacking. Scale bars indicate 20  $\mu$ m.

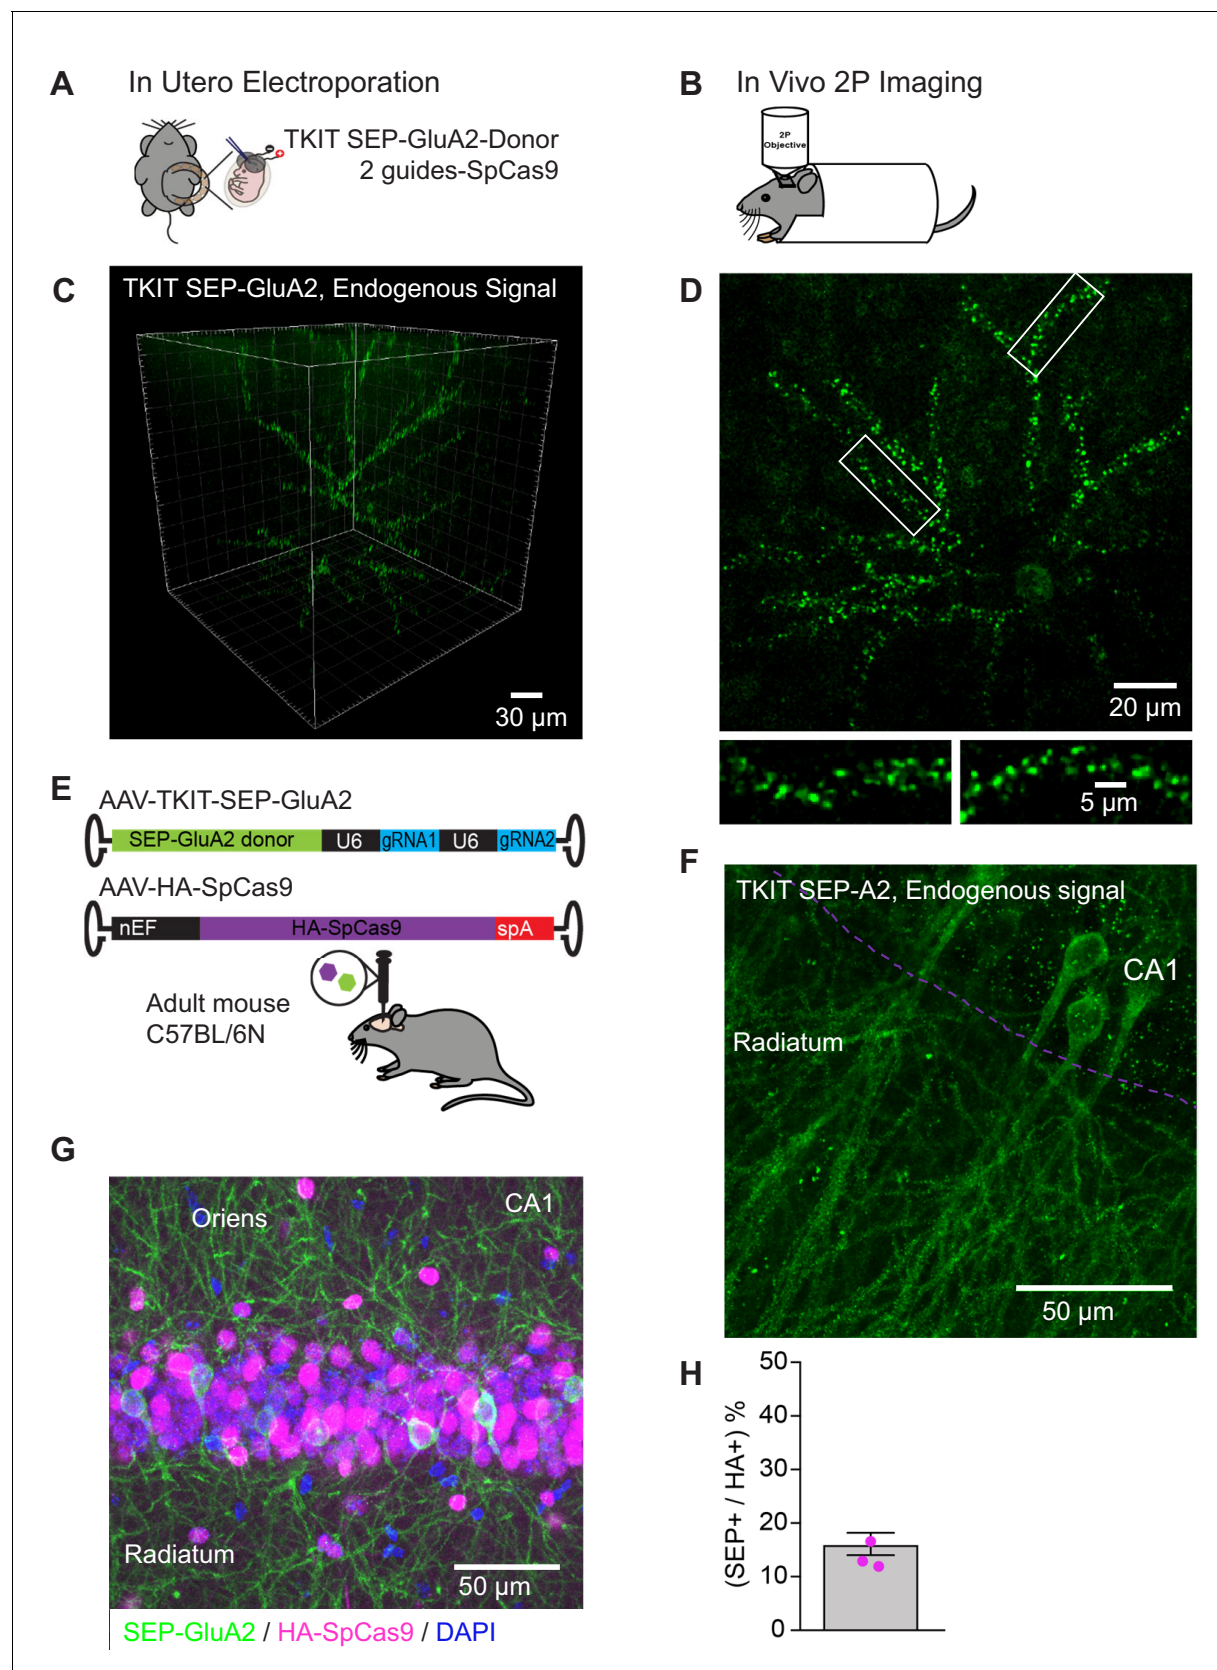

**Figure 5.** TKIT mediated KI in vivo. (A) Schematic of in utero electroporation and (B) subsequent in vivo two-photon microscopy setup. (C) Two-photon 3D reconstruction of a layer 2/3 pyramidal neuron with TKIT-mediated SEP-GluA2 KI. (D) Maximum intensity projection of the same example cell in (C) Figure 5 continued on next page

*Figure 5 continued*

with magnified dendritic segments (white boxes). Scale bars are shown in the bottom right corner of each image. (E) Dual AAV-HA-SpCas9 and AAV-TKIT-SEP-GluA2 injections were made into the dorsal hippocampus of adult C57BL/6N mice. (F) Confocal image of native SEP-GluA2 fluorescence signal. The CA1 cell layer is illustrated with a magenta dotted line with dendrites in Stratum radiatum. The image is a maximum intensity projection. (G) A composite confocal image showing the expression of SEP-GluA2 (GFP antibody, green), Cas9 (HA antibody, magenta), and nuclei (DAPI, blue). The image is a maximum intensity projection and is centered on the CA1 pyramidal cell layer. (H) Quantification of the 16.1% of HA-SpCas9 expressing cells that are also GFP positive. Scale bars are indicated in the bottom right corner of images.

## A Excitatory Neuron Knock-In

AAV-TKIT-SEP-GluA1

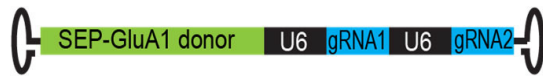

*Camk2a*<sup>Cre/wt</sup>:SpCas9<sup>fl/wt</sup>

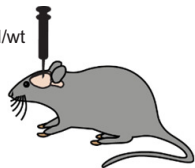

## B

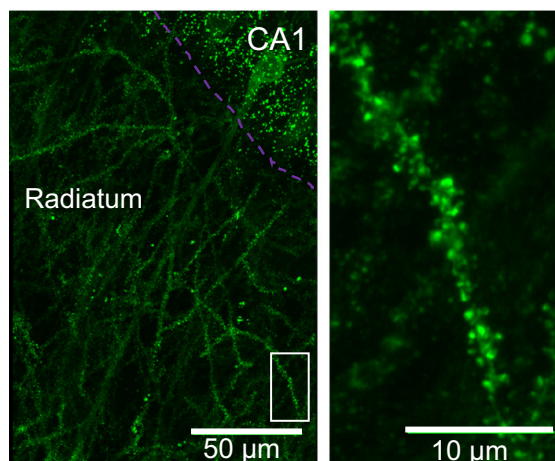

TKIT SEP-GluA1, Endogenous Signal

## C Inhibitory Neuron Knock-In

AAV-TKIT-SEP-GluA1

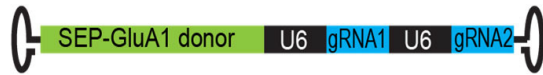

*Pvalb*<sup>Cre/wt</sup>:SpCas9<sup>fl/wt</sup>

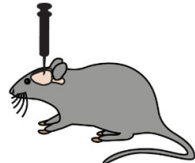

## D

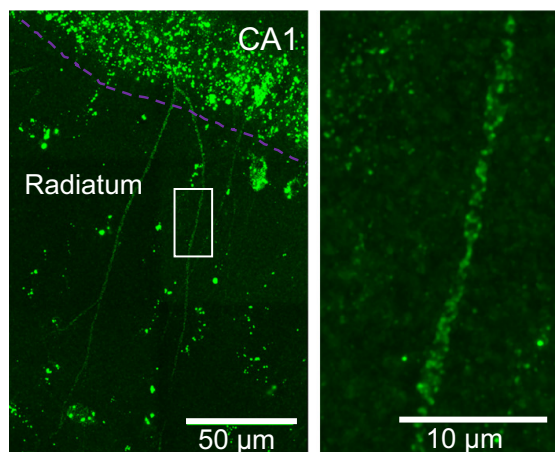

TKIT SEP-GluA1, Endogenous Signal

## E In Vivo 2-photon imaging

AAV-TKIT-SEP-GluA2

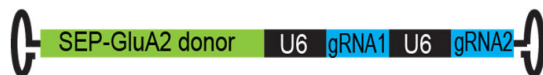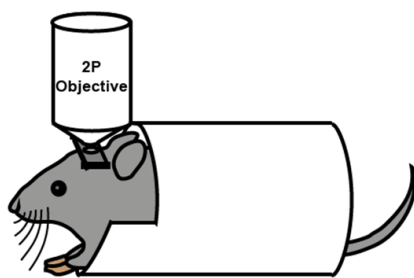

*Camk2a*<sup>Cre/wt</sup>:SpCas9<sup>fl/wt</sup>

## F

In vivo 2-photon microscopy

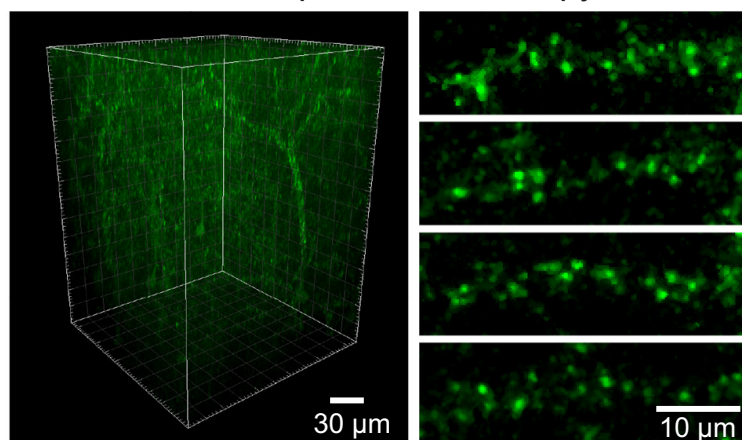

**Figure 6.** Cell-type specific KI with TKIT. (A) Schematic of experimental design for targeting excitatory neurons using *Camk2a*<sup>Cre</sup>:Cas9<sup>fl/wt</sup> animals (B) Super-resolution Airyscan confocal image of a CA1 pyramidal neuron with TKIT-mediated SEP-GluA1 KI illustrated as a maximum intensity projection. Figure 6 continued on next page

## Figure 6 continued

The CA1 cell layer is illustrated with a magenta dotted line with dendrites in Stratum radiatum. A zoomed in region (right) shows the dendritic segment indicated with a white box. (C) Schematic of experimental design for targeting PV positive interneurons using *Pvalb*<sup>Cre/wt</sup>:Cas9<sup>fl/wt</sup> animals. (D) Super-resolution Airyscan confocal image of a CA1 PV neuron with TKIT-mediated SEP-GluA1 KI illustrated as a maximum intensity projection. The CA1 cell layer is illustrated with a magenta dotted line with dendrites in Stratum radiatum. A zoomed in region (right) shows the dendritic segment indicated with a white box. (E) Schematic of experimental setup for two-photon image of virus-mediated TKIT GluA2 KI. (F) In vivo two-photon 3D reconstruction of a layer 2/3 pyramidal neuron in barrel cortex with TKIT-mediated SEP-GluA2 KI. High-magnification images of dendritic segments (right) from a maximum intensity projection of the same cell. Scale bars are indicated in the bottom right corner of images.



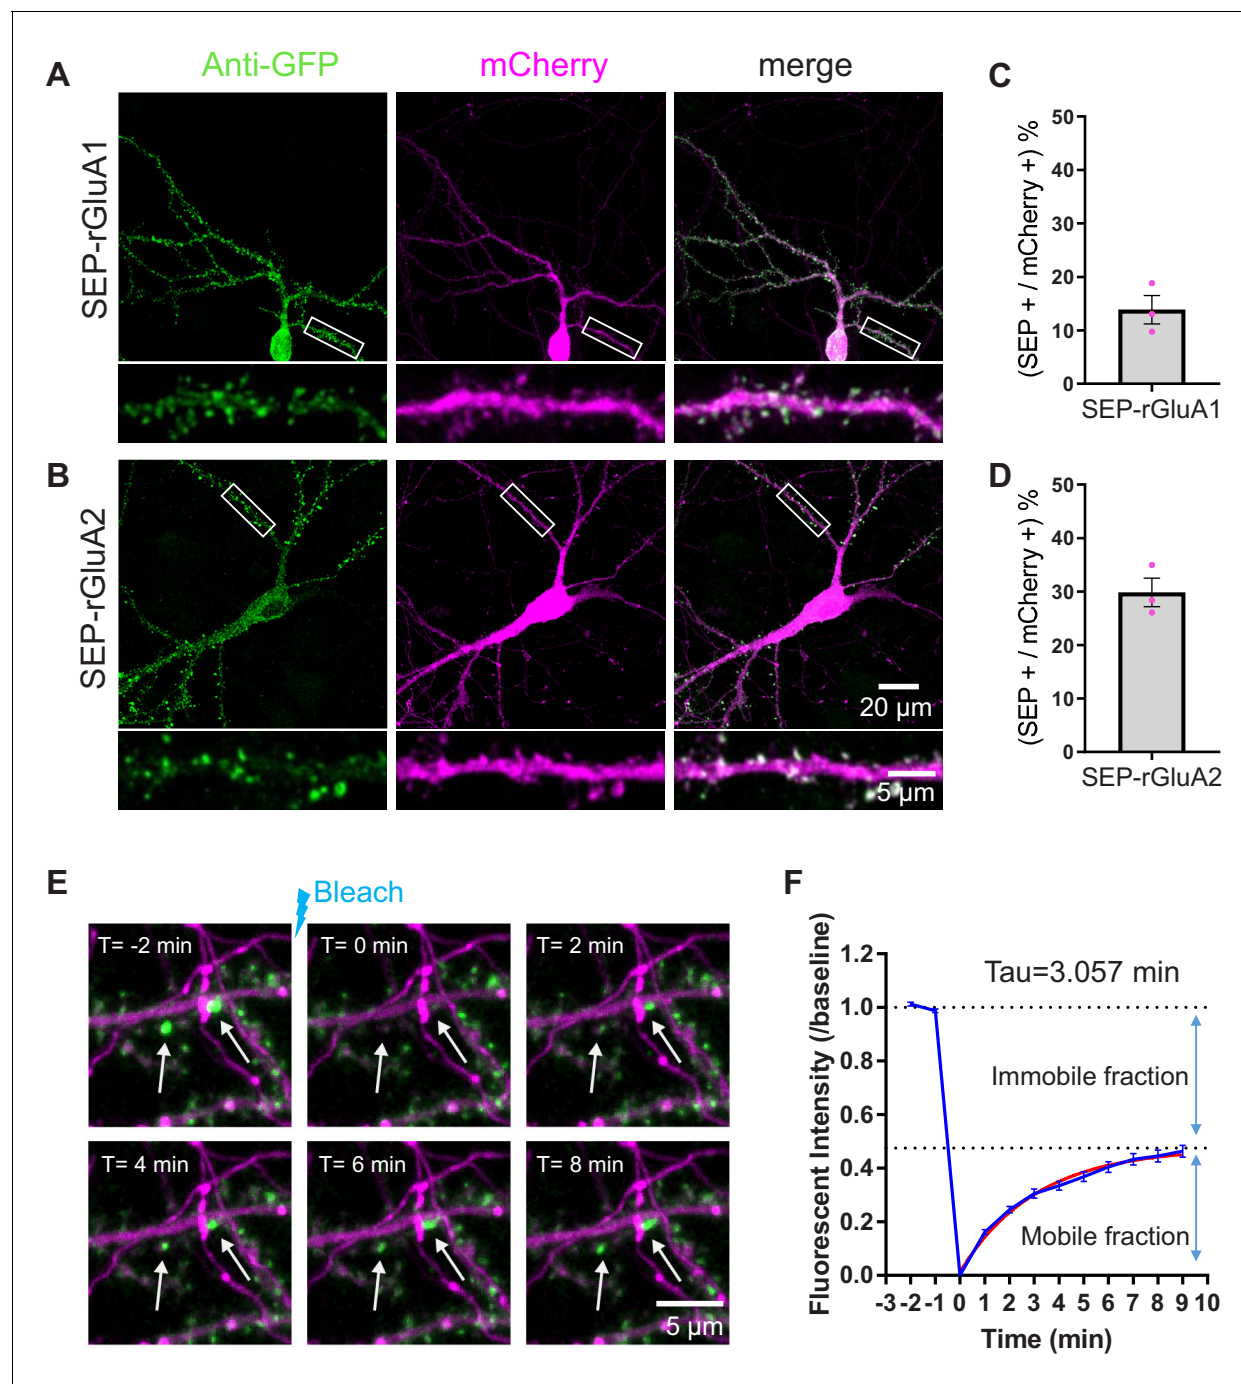

**Figure 7.** TKIT KI and FRAP in rat neurons. TKIT-mediated KI of SEP-GluA1 (A) and SEP-GluA2 (B) in primary cultured rat neurons. Efficiency of KI for SEP-GluA1 (C) and SEP-GluA2 (D). (E) Representative example of a SEP-GluA1 containing spine undergoing bleaching and fluorescence recovery. The white arrow indicates the spine that will be bleached. Images are separated by 2 min intervals. Scale bar indicates 5  $\mu$ m. (F) Summary of SEP-GluA1 FRAP data with estimated recovery time and immobile fraction of receptors. Red trace is from exponential (one-phase decay) fitting, GraphPad Prism 7.

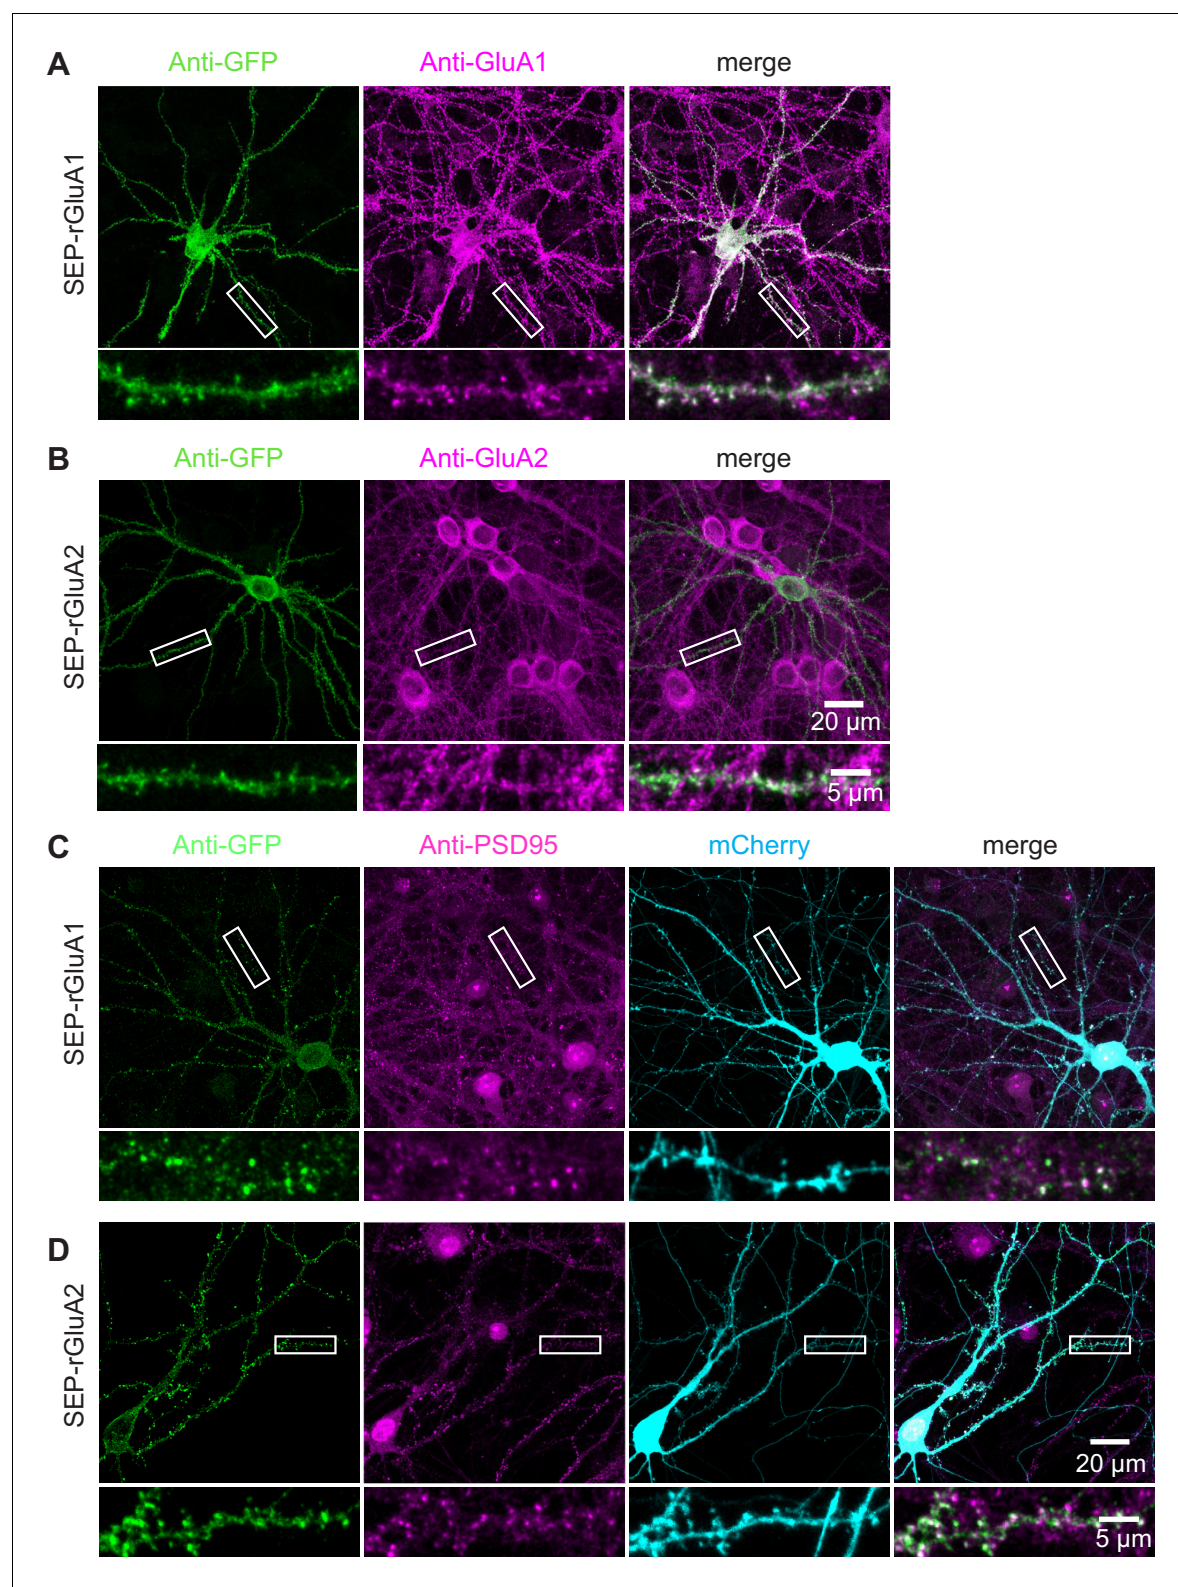

**Figure 7—figure supplement 1.** TKIT of SEP-GluA1 and SEP-GluA2 KI in rat neurons. Representative immunofluorescent images demonstrating TKIT of SEP-GluA1 (A) and SEP-GluA2 (B) in rat primary cultured neurons. The dendritic region within the white box is enlarged below to better illustrate co-localization between (A) SEP-GluA1 (green) and GluA1 (magenta), or (B) SEP-GluA2 (green) and GluA2 (magenta). (C and D) Co-localization of SEP-GluA1 and SEP-GluA2 with PSD95. The dendritic region within the white box is enlarged below to better illustrate co-localization between (C) SEP-GluA1 and PSD95, or (D) SEP-GluA2 and PSD95. Figure 7—figure supplement 1 continued on next page

Figure 7—figure supplement 1 continued

GluA1 (green) and PSD95 (magenta), or (D) SEP-GluA2 (green) with PSD95 (magenta). Note: The cell-fill channel was removed from the enlarged overlay images for clarity. Scale bars display 20  $\mu\text{m}$  or 5  $\mu\text{m}$ .
